# Supplementary material
Source: Research Square preprint supplement (doi:10.21203/rs.3.rs-9238693/v1)
Supplement: Supplementary file 1 [file 4500f2c218b83272ce4024ef.xlsx]

## Sheet: Annotated_OTUs
											CustomDB					Silva
OTU	DC1	DC2	DC3	DS1	DS2	DS3	RL1	RL2	RL3	PercentID	cPhylum	cClass	cOrder	cFamily	cGenus	sPhylum	sClass	sOrder	sFamily	sGenus	sSpecies	Length	Mismatch	Match?
ASV1974	8	0	25	0	0	0	46	2	10	99.136	Arthropoda	Arachnida	Oribatida	Limnozetidae	Limnozetes	Arthropoda	Arachnida	?	?	?	Limnozetes rugosus	463	4
ASV1421	22	0	76	0	0	0	59	1	4	99.132	Arthropoda	Arachnida	Oribatida	Limnozetidae	Limnozetes	Arthropoda	Arachnida	?	?	?	Limnozetes rugosus	461	4
ASV796	6	48	277	7	15	176	0	5	0	98.272	Arthropoda	Arachnida	Oribatida	Limnozetidae	Limnozetes	Arthropoda	Arachnida	?	?	?	?	463	8
ASV1484	0	3	147	0	0	0	0	1	0	98.048	Arthropoda	Arachnida	Oribatida	Limnozetidae	Limnozetes	Arthropoda	Arachnida	?	?	?	?	461	9
ASV856	88	55	308	0	0	6	0	0	0	97.397	Arthropoda	Arachnida	Oribatida	Limnozetidae	Limnozetes	Arthropoda	Arachnida	?	?	?	Allonothrus russeolus	461	12
ASV1269	53	32	103	0	0	20	0	0	0	97.192	Arthropoda	Arachnida	Oribatida	Limnozetidae	Limnozetes	Arthropoda	Arachnida	?	?	?	Allonothrus russeolus	463	13
ASV1355	64	24	73	0	0	17	0	0	0	96.963	Arthropoda	Arachnida	Oribatida	Limnozetidae	Limnozetes	Arthropoda	Arachnida	?	?	?	?	461	14
ASV2010	12	20	54	0	1	0	0	0	0	96.529	Arthropoda	Arachnida	Oribatida	Limnozetidae	Limnozetes	Arthropoda	Arachnida	?	?	?	Liodes sp.	461	16
ASV1856	12	32	55	0	3	0	0	0	0	94.457	Arthropoda	Arachnida	Oribatida	Limnozetidae	Limnozetes	Arthropoda	Arachnida	?	?	?	?	451	25
ASV2014	0	0	0	10	23	53	0	0	0	94.255	Arthropoda	Arachnida	Oribatida	Limnozetidae	Limnozetes	Arthropoda	Arachnida	?	?	?	Zoysia pacifica	470	20
ASV835	135	60	186	10	2	0	21	36	32	93.035	Arthropoda	Arachnida	Oribatida	Limnozetidae	Limnozetes	Arthropoda	Arachnida	?	?	?	?	201	13
ASV391	113	200	1262	16	7	64	0	1	5	92.662	Arthropoda	Arachnida	Oribatida	Limnozetidae	Limnozetes	Arthropoda	Arachnida	?	?	?	?	477	20
ASV865	26	55	361	8	0	0	0	0	2	92.662	Arthropoda	Arachnida	Oribatida	Limnozetidae	Limnozetes	Arthropoda	Arachnida	?	?	?	?	477	20
ASV2029	46	0	39	0	0	0	0	0	0	92.5	Arthropoda	Arachnida	Oribatida	Limnozetidae	Limnozetes	Arthropoda	Arachnida	?	?	?	?	200	14
ASV989	8	46	276	8	0	0	0	6	0	92	Arthropoda	Arachnida	Oribatida	Limnozetidae	Limnozetes	Arthropoda	Arachnida	?	?	?	?	475	23
ASV1584	11	24	82	0	0	0	0	5	11	87.527	Arthropoda	Arachnida	Oribatida	Limnozetidae	Limnozetes	Arthropoda	Arachnida	?	?	?	Recifella sp.	465	53
ASV507	303	159	525	10	1	0	44	40	50	87.446	Arthropoda	Arachnida	Oribatida	Limnozetidae	Limnozetes	Arthropoda	Arachnida	?	?	?	?	462	55
ASV1194	130	22	17	5	0	0	40	18	9	87.284	Arthropoda	Arachnida	Oribatida	Limnozetidae	Limnozetes	Arthropoda	Arachnida	?	?	?	?	464	52
ASV1368	88	13	29	3	0	0	19	11	11	87.124	Arthropoda	Arachnida	Oribatida	Limnozetidae	Limnozetes	Arthropoda	Arachnida	?	?	?	?	466	53
ASV310	0	7	0	809	346	1209	0	0	1	86.78	Arthropoda	Arachnida	Oribatida	Limnozetidae	Limnozetes	Arthropoda	Arachnida	Scorpiones	?	?	?	469	49
ASV399	0	3	0	489	221	904	0	0	0	86.724	Arthropoda	Arachnida	Oribatida	Limnozetidae	Limnozetes	Arthropoda	Arachnida	Scorpiones	?	?	?	467	49
ASV212	0	5	0	1547	693	1954	0	0	0	86.538	Arthropoda	Arachnida	Oribatida	Limnozetidae	Limnozetes	Arthropoda	Arachnida	Scorpiones	?	?	?	468	50
ASV1574	0	0	0	49	11	75	0	0	0	82.906	Arthropoda	Arachnida	Oribatida	Limnozetidae	Limnozetes	Arthropoda	Arachnida	?	?	?	?	468	67
ASV1774	0	0	0	37	18	56	0	0	0	82.906	Arthropoda	Arachnida	Oribatida	Limnozetidae	Limnozetes	Arthropoda	Arachnida	?	?	?	?	468	67
ASV1245	0	0	0	52	9	158	0	0	0	82.766	Arthropoda	Arachnida	Oribatida	Limnozetidae	Limnozetes	Arthropoda	Arachnida	?	?	?	?	470	68
ASV1524	0	0	0	62	12	69	0	0	0	82.34	Arthropoda	Arachnida	Oribatida	Limnozetidae	Limnozetes	Arthropoda	Arachnida	?	?	?	?	470	70
ASV374	18	508	87	120	726	270	58	0	0	81.852	Arthropoda	Arachnida	Oribatida	Limnozetidae	Limnozetes	Ciliophora	Intramacronucleata	Conthreep	Phyllopharyngea	?	?	270	39
ASV1081	21	0	0	263	0	0	6	0	0	81.362	Arthropoda	Arachnida	Oribatida	Limnozetidae	Limnozetes	Apicomplexa	Conoidasida	Gregarinasina	Eugregarinorida	?	?	279	39
ASV1371	18	0	0	153	1	0	2	0	0	81.227	Arthropoda	Arachnida	Oribatida	Limnozetidae	Limnozetes	Apicomplexa	Conoidasida	Gregarinasina	Eugregarinorida	?	?	277	39
ASV410	40	540	90	118	541	193	16	0	0	81.111	Arthropoda	Arachnida	Oribatida	Limnozetidae	Limnozetes	Ciliophora	Intramacronucleata	Conthreep	Phyllopharyngea	?	?	270	41
ASV1369	17	0	0	155	0	0	2	0	0	81.004	Arthropoda	Arachnida	Oribatida	Limnozetidae	Limnozetes	Apicomplexa	Conoidasida	Gregarinasina	Eugregarinorida	?	?	279	40
ASV2193	10	18	5	15	6	0	15	2	4	79.07	Arthropoda	Arachnida	Oribatida	Limnozetidae	Limnozetes	Phragmoplastophyta	?	?	?	?	?	473	74
ASV2291	0	35	7	0	0	0	0	16	10	78.692	Arthropoda	Arachnida	Oribatida	Limnozetidae	Limnozetes	Cryptomycota	Incertae Sedis	Incertae Sedis	?	?	?	474	73
ASV739	0	0	542	0	0	0	0	18	40	77.778	Arthropoda	Arachnida	Oribatida	Limnozetidae	Limnozetes	Apicomplexa	Conoidasida	Gregarinasina	Eugregarinorida	Paraschneideria	?	477	67
ASV425	5	0	1259	0	0	0	0	90	124	77.754	Arthropoda	Arachnida	Oribatida	Limnozetidae	Limnozetes	Apicomplexa	Conoidasida	Gregarinasina	Eugregarinorida	Paraschneideria	uncultured alveolate	472	74
ASV1699	0	0	117	2	0	0	0	0	0	77.568	Arthropoda	Arachnida	Oribatida	Limnozetidae	Limnozetes	Apicomplexa	Conoidasida	Gregarinasina	?	?	?	477	71
ASV294	0	4	0	2055	377	197	0	0	0	77.358	Arthropoda	Arachnida	Oribatida	Limnozetidae	Limnozetes	Apicomplexa	Conoidasida	Gregarinasina	Neogregarinorida	?	?	477	72
ASV1681	0	122	0	0	0	0	0	0	0	77.358	Arthropoda	Arachnida	Oribatida	Limnozetidae	Limnozetes	Apicomplexa	Conoidasida	Gregarinasina	Neogregarinorida	?	?	477	72
ASV991	0	0	22	12	11	16	266	6	10	77.322	Arthropoda	Arachnida	Oribatida	Limnozetidae	Limnozetes	?	?	?	?	?	?	463	77
ASV670	6	0	0	261	314	121	0	0	0	77.263	Arthropoda	Arachnida	Oribatida	Limnozetidae	Limnozetes	Apicomplexa	Conoidasida	Gregarinasina	Neogregarinorida	?	?	475	76
ASV143	17	166	101	4681	1624	1191	0	4	2	77.197	Arthropoda	Arachnida	Oribatida	Limnozetidae	Limnozetes	Apicomplexa	Conoidasida	Gregarinasina	Neogregarinorida	?	?	478	71
ASV724	17	0	0	233	247	123	0	0	0	76.842	Arthropoda	Arachnida	Oribatida	Limnozetidae	Limnozetes	Apicomplexa	Conoidasida	Gregarinasina	Neogregarinorida	?	?	475	78
ASV2167	0	4	0	43	30	0	0	0	0	90.805	Arthropoda	Insecta	Coleoptera	Chrysomelidae	Oomorphoides							87	8
ASV203	1240	676	2280	0	0	0	69	96	172	96.667	Arthropoda	Insecta	Coleoptera	Chrysomeloidea	Stenomela	Cercozoa	Vampyrellidae	?	?	?	uncultured freshwater eukaryote	90	3
ASV960	0	0	0	0	0	0	197	71	97	96.667	Arthropoda	Insecta	Coleoptera	Chrysomeloidea	Calligrapha	Cercozoa	Vampyrellidae	?	?	?	?	90	3
ASV1617	6	0	50	5	22	0	3	17	27	96.667	Arthropoda	Insecta	Coleoptera	Chrysomeloidea	Calligrapha	Cercozoa	Vampyrellidae	?	?	?	?	90	3
ASV1834	0	0	7	0	0	0	96	1	0	96.667	Arthropoda	Insecta	Coleoptera	Chrysomeloidea	Stenomela	Cercozoa	Vampyrellidae	?	?	?	?	90	3
ASV2147	0	5	7	0	0	0	57	0	9	96.667	Arthropoda	Insecta	Coleoptera	Chrysomeloidea	Stenomela	Cercozoa	Vampyrellidae	?	?	?	?	90	3
ASV2832	11	1	0	28	0	1	0	0	0	96.667	Arthropoda	Insecta	Coleoptera	Chrysomeloidea	Calligrapha							90	3
ASV897	5	3	2	128	275	3	2	3	1	95.652	Arthropoda	Insecta	Coleoptera	Chrysomeloidea	Stenomela	Cercozoa	Vampyrellidae	?	?	?	?	92	4
ASV133	2346	1683	3987	0	0	0	108	228	351	95.556	Arthropoda	Insecta	Coleoptera	Chrysomeloidea	Stenomela	Cercozoa	Vampyrellidae	?	?	?	uncultured freshwater eukaryote	90	4
ASV256	1161	612	1186	0	0	0	33	77	144	95.556	Arthropoda	Insecta	Coleoptera	Chrysomeloidea	Stenomela	Cercozoa	Vampyrellidae	?	?	?	uncultured freshwater eukaryote	90	4
ASV1039	0	0	0	0	0	0	178	62	71	95.556	Arthropoda	Insecta	Coleoptera	Chrysomeloidea	Calligrapha	Cercozoa	Vampyrellidae	?	?	?	?	90	4
ASV1436	0	0	24	0	0	0	134	2	0	95.556	Arthropoda	Insecta	Coleoptera	Chrysomeloidea	Stenomela	Cercozoa	Vampyrellidae	?	?	?	?	90	4
ASV1608	6	0	44	10	27	0	2	20	21	95.556	Arthropoda	Insecta	Coleoptera	Chrysomeloidea	Calligrapha	Cercozoa	Vampyrellidae	?	?	?	?	90	4
ASV1950	0	0	8	0	0	0	82	1	2	95.556	Arthropoda	Insecta	Coleoptera	Chrysomeloidea	Stenomela	Cercozoa	Vampyrellidae	?	?	?	?	90	4
ASV2385	0	8	1	0	0	0	41	5	8	95.556	Arthropoda	Insecta	Coleoptera	Chrysomeloidea	Stenomela	Cercozoa	Vampyrellidae	?	?	?	?	90	4
ASV427	152	1	14	0	0	0	1028	101	174	95.556	Arthropoda	Insecta	Coleoptera	Chrysomeloidea	Calligrapha	Cercozoa	Vampyrellidae	?	?	?	?	90	4
ASV2593	1	0	0	14	0	37	0	0	0	95.402	Arthropoda	Insecta	Coleoptera	Chrysomeloidea	Aphthonoides	Arthropoda	Arachnida	?	?	?	?	87	4
ASV1500	28	0	30	13	4	0	59	3	11	95	Arthropoda	Insecta	Coleoptera	Chrysomeloidea		Cercozoa	Vampyrellidae	?	?	?	?	100	4
ASV1675	6	9	10	0	0	0	20	34	43	95	Arthropoda	Insecta	Coleoptera	Chrysomeloidea		Cercozoa	Vampyrellidae	?	?	?	?	100	4
ASV1982	3	7	63	0	2	0	0	7	8	94.898	Arthropoda	Insecta	Coleoptera	Chrysomeloidea	Disonycha	Cercozoa	Vampyrellidae	?	?	?	?	98	4
ASV1705	7	2	22	24	36	0	22	0	5	94.845	Arthropoda	Insecta	Coleoptera	Chrysomeloidea	Lamprosphaerus	?	?	?	?	?	?	97	5
ASV2277	28	2	15	0	4	0	15	2	3	94.845	Arthropoda	Insecta	Coleoptera	Chrysomeloidea	Plagiodera	?	?	?	?	?	?	97	5
ASV2332	0	0	3	0	32	0	31	0	0	94.845	Arthropoda	Insecta	Coleoptera	Chrysomeloidea	Lamprosphaerus	?	?	?	?	?	?	97	5
ASV2339	0	0	12	3	21	24	5	0	0	94.845	Arthropoda	Insecta	Coleoptera	Chrysomeloidea	Lamprosphaerus	?	?	?	?	?	?	97	5
ASV2351	27	4	17	0	3	0	9	0	4	94.845	Arthropoda	Insecta	Coleoptera	Chrysomeloidea	Plagiodera	?	?	?	?	?	?	97	5
ASV221	607	34	47	0	6	0	2412	357	607	94.444	Arthropoda	Insecta	Coleoptera	Chrysomeloidea	Calligrapha	Cercozoa	Vampyrellidae	?	?	?	?	90	5
ASV470	220	9	21	0	0	0	682	138	203	94.444	Arthropoda	Insecta	Coleoptera	Chrysomeloidea	Calligrapha	Cercozoa	Vampyrellidae	?	?	?	?	90	5
ASV982	14	0	129	15	34	0	9	75	77	94.444	Arthropoda	Insecta	Coleoptera	Chrysomeloidea	Calligrapha	Cercozoa	Vampyrellidae	?	?	?	?	90	5
ASV1573	0	5	0	0	0	0	0	39	91	94	Arthropoda	Insecta	Coleoptera	Chrysomeloidea		Cercozoa	Vampyrellidae	?	?	?	?	100	5
ASV1631	10	5	13	0	0	0	18	31	51	94	Arthropoda	Insecta	Coleoptera	Chrysomeloidea		Cercozoa	Vampyrellidae	?	?	?	?	100	5
ASV1030	31	0	57	0	0	0	90	53	84	93.939	Arthropoda	Insecta	Coleoptera	Chrysomeloidea		Cercozoa	Vampyrellidae	?	?	?	?	99	5
ASV161	547	172	1397	887	550	123	1247	753	870	93.878	Arthropoda	Insecta	Coleoptera	Chrysomeloidea	Disonycha	Cercozoa	Vampyrellidae	?	?	?	?	98	5
ASV1901	1	14	58	0	1	0	0	16	8	93.878	Arthropoda	Insecta	Coleoptera	Chrysomeloidea	Disonycha	Cercozoa	Vampyrellidae	?	?	?	?	98	5
ASV674	15	8	132	122	201	87	122	3	7	93.814	Arthropoda	Insecta	Coleoptera	Chrysomeloidea	Lamprosphaerus	?	?	?	?	?	?	97	6
ASV1545	1	0	4	60	35	16	22	0	1	93.814	Arthropoda	Insecta	Coleoptera	Chrysomeloidea	Lamprosphaerus	?	?	?	?	?	?	97	6
ASV2278	0	0	8	5	28	22	5	1	0	93.814	Arthropoda	Insecta	Coleoptera	Chrysomeloidea	Lamprosphaerus	?	?	?	?	?	?	97	6
ASV2753	20	1	17	0	0	0	6	0	1	93.814	Arthropoda	Insecta	Coleoptera	Chrysomeloidea	Plagiodera	?	?	?	?	?	?	97	6
ASV313	0	0	2289	0	3	22	0	0	0	93.814	Arthropoda	Insecta	Coleoptera	Chrysomeloidea		Cercozoa	Vampyrellidae	?	?	?	?	97	6
ASV1480	0	0	0	9	34	52	30	2	25	93.814	Arthropoda	Insecta	Coleoptera	Chrysomeloidea	Stenomela	Cercozoa	Vampyrellidae	?	?	?	?	97	6
ASV404	260	80	721	0	0	0	123	169	205	93.75	Arthropoda	Insecta	Coleoptera	Chrysomeloidea	Disonycha	Cercozoa	Vampyrellidae	?	?	?	?	96	5
ASV35	9928	2441	3451	0	0	0	8919	16711	18582	93.407	Arthropoda	Insecta	Coleoptera	Chrysomeloidea	Stenomela	Cercozoa	Vampyrellidae	?	?	?	?	91	4
ASV1225	0	0	0	0	0	0	24	74	130	93.333	Arthropoda	Insecta	Coleoptera	Chrysomeloidea	Calligrapha	Cryptomycota	?	?	?	?	?	90	6
ASV286	0	0	17	10	0	0	2571	81	101	93.182	Arthropoda	Insecta	Coleoptera	Chrysomeloidea		Cercozoa	Vampyrellidae	?	?	?	?	88	5
ASV1091	37	0	33	0	0	0	57	67	90	93.103	Arthropoda	Insecta	Coleoptera	Chrysomeloidea		Cercozoa	Vampyrellidae	?	?	?	?	87	5
ASV2540	0	54	0	0	0	0	0	0	0	93.103	Arthropoda	Insecta	Coleoptera	Chrysomeloidea	Aphthonoides	Cercozoa	?	?	?	?	?	87	6
ASV1851	18	0	15	24	25	20	0	0	0	93.069	Arthropoda	Insecta	Coleoptera	Chrysomeloidea	Nisotra	Cercozoa	Vampyrellidae	?	?	?	?	101	6
ASV379	0	0	6	3	0	0	1558	72	107	93	Arthropoda	Insecta	Coleoptera	Chrysomeloidea		Cercozoa	Vampyrellidae	?	?	?	?	100	6
ASV466	4	0	336	11	47	23	817	25	26	92.857	Arthropoda	Insecta	Coleoptera	Chrysomeloidea	Disonycha	Cercozoa	Vampyrellidae	?	?	?	?	84	6
ASV252	130	40	1251	11	133	88	1371	146	125	92.784	Arthropoda	Insecta	Coleoptera	Chrysomeloidea	Disonycha	Cercozoa	Vampyrellidae	?	?	?	?	97	7
ASV280	0	0	2870	0	1	48	0	0	0	92.784	Arthropoda	Insecta	Coleoptera	Chrysomeloidea		Cercozoa	Vampyrellidae	?	?	?	?	97	7
ASV608	14	0	187	13	76	22	504	18	20	92.784	Arthropoda	Insecta	Coleoptera	Chrysomeloidea	Disonycha	Cercozoa	Vampyrellidae	?	?	?	?	97	7
ASV1412	15	0	5	70	61	14	0	0	0	92.784	Arthropoda	Insecta	Coleoptera	Chrysomeloidea	Disonycha	Cercozoa	Vampyrellidae	?	?	?	?	97	7
ASV1712	0	0	0	15	33	34	18	4	13	92.784	Arthropoda	Insecta	Coleoptera	Chrysomeloidea	Stenomela	Cercozoa	Vampyrellidae	?	?	?	?	97	7
ASV2154	0	0	0	21	7	41	0	5	4	92.784	Arthropoda	Insecta	Coleoptera	Chrysomeloidea	Stenomela	Cercozoa	Vampyrellidae	?	?	?	?	97	7
ASV2517	0	19	0	0	0	0	3	8	25	92.784	Arthropoda	Insecta	Coleoptera	Chrysomeloidea	Disonycha	Cercozoa	Vampyrellidae	?	?	?	?	97	7
ASV625	120	27	253	0	0	0	82	134	181	92.784	Arthropoda	Insecta	Coleoptera	Chrysomeloidea	Disonycha	Cercozoa	Vampyrellidae	?	?	?	?	97	6
ASV2499	0	0	0	27	9	20	0	0	0	92.308	Arthropoda	Insecta	Coleoptera	Chrysomeloidea	Cryptocephalus	Cercozoa	Vampyrellidae	?	?	?	?	104	6
ASV1013	0	0	0	0	0	0	326	0	1	92.222	Arthropoda	Insecta	Coleoptera	Chrysomeloidea	Stenomela	Cercozoa	Vampyrellidae	?	?	?	?	90	7
ASV1390	23	0	34	37	53	23	0	0	0	92.079	Arthropoda	Insecta	Coleoptera	Chrysomeloidea	Nisotra	Cercozoa	Vampyrellidae	?	?	?	?	101	7
ASV1727	0	0	0	69	46	0	0	0	0	92.079	Arthropoda	Insecta	Coleoptera	Chrysomeloidea	Nisotra	Cercozoa	Vampyrellidae	?	?	?	?	101	7
ASV1108	45	0	34	0	0	0	52	58	87	91.919	Arthropoda	Insecta	Coleoptera	Chrysomeloidea		Cercozoa	Vampyrellidae	?	?	?	?	99	7
ASV2477	15	5	14	0	8	0	0	4	11	91.919	Arthropoda	Insecta	Coleoptera	Chrysomeloidea	Nisotra	Cercozoa	Vampyrellidae	?	?	?	?	99	7
ASV1104	0	0	0	23	62	193	0	0	0	91.781	Arthropoda	Insecta	Coleoptera	Chrysomeloidea	Phratora	Arthropoda	Insecta	Hemiptera	?	?	?	146	11
ASV1084	0	0	0	24	75	189	0	0	0	91.772	Arthropoda	Insecta	Coleoptera	Chrysomeloidea	Phratora	Arthropoda	Insecta	Hemiptera	?	?	?	158	12
ASV1458	0	13	21	0	0	0	12	45	65	91.209	Arthropoda	Insecta	Coleoptera	Chrysomeloidea	Stenomela	Cercozoa	?	?	?	?	?	91	6
ASV2805	0	3	4	0	0	0	6	9	20	91.209	Arthropoda	Insecta	Coleoptera	Chrysomeloidea	Stenomela	Cercozoa	?	?	?	?	?	91	6
ASV1327	26	0	28	39	61	35	0	0	0	91.089	Arthropoda	Insecta	Coleoptera	Chrysomeloidea	Nisotra	Cercozoa	Vampyrellidae	?	?	?	?	101	8
ASV1605	0	0	0	68	61	2	0	0	0	91.089	Arthropoda	Insecta	Coleoptera	Chrysomeloidea	Nisotra	Cercozoa	Vampyrellidae	?	?	?	?	101	8
ASV279	0	1533	876	0	0	0	19	178	313	90.805	Arthropoda	Insecta	Coleoptera	Chrysomeloidea	Aphthonoides							87	8
ASV278	0	1579	801	0	0	0	13	181	370	90.789	Arthropoda	Insecta	Coleoptera	Chrysomeloidea	Aphthonoides							76	7
ASV1300	5	0	16	10	43	56	39	9	18	90.722	Arthropoda	Insecta	Coleoptera	Chrysomeloidea	Stenomela	Cercozoa	Vampyrellidae	?	?	?	?	97	9
ASV1643	3	0	2	10	42	31	26	6	7	90.722	Arthropoda	Insecta	Coleoptera	Chrysomeloidea	Stenomela	Cercozoa	Vampyrellidae	?	?	?	?	97	9
ASV1580	7	0	0	0	0	0	16	49	62	89.011	Arthropoda	Insecta	Coleoptera	Chrysomeloidea	Stenomela	Cercozoa	Vampyrellidae	?	?	?	?	91	8
ASV2582	1	0	1	0	0	0	8	20	22	89.011	Arthropoda	Insecta	Coleoptera	Chrysomeloidea	Stenomela	Cercozoa	Vampyrellidae	?	?	?	?	91	8
ASV2468	0	0	0	12	34	12	0	0	0	83.794	Arthropoda	Insecta	Coleoptera	Chrysomeloidea	Mimastra	Arthropoda	Insecta	Psocoptera	?	?	?	253	30
ASV1320	0	0	9	61	50	70	0	0	0	83.721	Arthropoda	Insecta	Coleoptera	Chrysomeloidea		Centrohelida	?	?	?	?	uncultured eukaryote	215	28
ASV848	0	0	0	113	353	0	0	0	0	82.424	Arthropoda	Insecta	Coleoptera	Chrysomeloidea	Pheloticus	Cnidaria	Myxozoa	Bivalvulida	?	?	?	165	21
ASV1588	0	0	5	0	0	2	8	33	85	82.273	Arthropoda	Insecta	Coleoptera	Chrysomeloidea		Centrohelida	?	?	?	?	uncultured eukaryote	220	29
ASV1015	0	0	24	12	42	0	158	37	53	82.079	Arthropoda	Insecta	Coleoptera	Chrysomeloidea		Centrohelida	?	?	?	?	?	279	40
ASV1847	0	0	4	0	20	0	57	9	13	82.079	Arthropoda	Insecta	Coleoptera	Chrysomeloidea		Centrohelida	?	?	?	?	?	279	40
ASV937	24	1	66	0	3	0	115	62	111	81.949	Arthropoda	Insecta	Coleoptera	Chrysomeloidea		Centrohelida	?	?	?	?	uncultured eukaryote	277	37
ASV556	27	102	157	139	144	164	9	101	149	81.72	Arthropoda	Insecta	Coleoptera	Chrysomeloidea		Centrohelida	?	?	?	?	?	279	40
ASV1569	0	0	0	54	45	37	0	0	0	81.72	Arthropoda	Insecta	Coleoptera	Chrysomeloidea		Centrohelida	?	?	?	?	?	279	38
ASV465	90	19	366	0	9	0	379	136	293	81.588	Arthropoda	Insecta	Coleoptera	Chrysomeloidea		Centrohelida	?	?	?	?	uncultured eukaryote	277	38
ASV1568	0	0	0	64	47	25	0	0	0	81.588	Arthropoda	Insecta	Coleoptera	Chrysomeloidea		Centrohelida	?	?	?	?	?	277	38
ASV1940	0	0	4	0	10	0	51	10	18	81.588	Arthropoda	Insecta	Coleoptera	Chrysomeloidea		Centrohelida	?	?	?	?	?	277	41
ASV2236	0	0	0	16	35	21	0	0	0	81.563	Arthropoda	Insecta	Coleoptera	Chrysomeloidea	Mimastra	Arthropoda	Insecta	Psocoptera	?	?	?	499	72
ASV895	1	0	9	0	0	0	276	56	85	81.495	Arthropoda	Insecta	Coleoptera	Chrysomeloidea		Centrohelida	?	?	?	?	?	281	40
ASV505	9	0	18	0	0	1	696	191	225	81.362	Arthropoda	Insecta	Coleoptera	Chrysomeloidea		Centrohelida	?	?	?	?	?	279	40
ASV791	46	17	71	0	5	0	231	48	125	81.362	Arthropoda	Insecta	Coleoptera	Chrysomeloidea		Centrohelida	?	?	?	?	uncultured eukaryote	279	39
ASV839	8	0	4	0	0	0	291	68	105	81.362	Arthropoda	Insecta	Coleoptera	Chrysomeloidea		Centrohelida	?	?	?	?	?	279	40
ASV894	0	0	0	192	118	117	0	0	0	81.362	Arthropoda	Insecta	Coleoptera	Chrysomeloidea		Centrohelida	?	?	?	?	?	279	39
ASV1402	0	0	14	43	60	50	0	0	0	81.295	Arthropoda	Insecta	Coleoptera	Chrysomeloidea		Centrohelida	?	?	?	?	uncultured eukaryote	278	40
ASV1095	0	0	20	67	69	126	0	0	0	81.159	Arthropoda	Insecta	Coleoptera	Chrysomeloidea		Centrohelida	?	?	?	?	uncultured eukaryote	276	40
ASV1339	0	0	8	57	61	59	0	0	0	80.576	Arthropoda	Insecta	Coleoptera	Chrysomeloidea		Centrohelida	?	?	?	?	uncultured eukaryote	278	42
ASV1387	0	77	93	0	0	0	0	0	0	77.978	Arthropoda	Insecta	Coleoptera	Chrysomeloidea	Cryptocephalus	Dinoflagellata	Dinophyceae	Gymnodiniphycidae	Suessiaceae	?	?	277	49
ASV618	630	0	160	0	0	0	31	0	0	82.171	Arthropoda	Insecta	Coleoptera	Hydraenidae	Hydraena	Centrohelida	?	?	?	?	?	258	29
ASV2257	52	0	6	0	0	0	12	0	0	81.625	Arthropoda	Insecta	Coleoptera	Hydraenidae	Hydraena	Centrohelida	?	?	?	?	?	283	35
ASV1270	0	0	0	117	42	49	0	0	0	80.287	Arthropoda	Insecta	Coleoptera	Hydraenidae	Hydraena	Centrohelida	?	?	?	?	uncultured eukaryote	279	46
ASV818	2	73	0	0	243	0	0	60	128	79.57	Arthropoda	Insecta	Coleoptera	Hydraenidae	Hydraena	Centrohelida	?	?	?	?	?	279	47
ASV1000	3	19	0	0	197	0	0	30	86	79.57	Arthropoda	Insecta	Coleoptera	Hydraenidae	Hydraena	Centrohelida	?	?	?	?	?	279	47
ASV1236	0	0	0	99	46	79	0	0	0	79.57	Arthropoda	Insecta	Coleoptera	Hydraenidae	Hydraena	Centrohelida	?	?	?	?	uncultured eukaryote	279	48
ASV347	9	0	10	189	322	138	1029	93	210	78.97	Arthropoda	Insecta	Coleoptera	Hydraenidae	Hydraena	Centrohelida	?	?	?	?	?	233	39
ASV2839	0	0	2	2	2	1	29	4	1	78.744	Arthropoda	Insecta	Coleoptera	Hydraenidae	Hydraena	Centrohelida	?	?	?	?	?	207	34
ASV462	196	65	42	0	0	0	231	399	375	96.552	Arthropoda	Insecta	Coleoptera	Hydrophilidae	Enochrus	Cercozoa	Vampyrellidae	?	?	?	?	87	3
ASV2611	9	15	6	0	0	0	19	2	0	85.443	Arthropoda	Insecta	Coleoptera	Hydrophilidae	Enochrus							158	23
ASV2206	0	4	0	42	28	0	0	0	0	85.35	Arthropoda	Insecta	Coleoptera	Hydrophilidae	Enochrus	Centrohelida	?	?	?	?	?	157	21
ASV2087	11	45	26	0	0	0	0	0	0	84.277	Arthropoda	Insecta	Coleoptera	Hydrophilidae	Enochrus	Centrohelida	?	?	?	?	?	159	23
ASV493	66	136	160	204	436	23	116	7	41	83.043	Arthropoda	Insecta	Coleoptera	Hydrophilidae	Enochrus	Centrohelida	?	?	?	?	?	230	32
ASV527	6	999	73	0	0	0	0	0	0	82.673	Arthropoda	Insecta	Coleoptera	Hydrophilidae	Enochrus	?	?	?	?	?	?	202	32
ASV1615	9	24	0	26	27	37	1	5	1	82.213	Arthropoda	Insecta	Coleoptera	Hydrophilidae	Enochrus	Centrohelida	?	?	?	?	?	253	34
ASV538	77	28	43	155	184	75	263	91	122	81.513	Arthropoda	Insecta	Coleoptera	Hydrophilidae	Enochrus	Centrohelida	?	?	?	?	uncultured eukaryote	238	34
ASV954	33	0	0	197	25	67	50	0	1	79.783	Arthropoda	Insecta	Coleoptera	Hydrophilidae	Enochrus	Centrohelida	?	?	?	?	?	277	43
ASV1329	16	0	0	110	23	26	12	0	0	79.57	Arthropoda	Insecta	Coleoptera	Hydrophilidae	Enochrus	Centrohelida	?	?	?	?	?	279	44
ASV2406	0	0	0	9	4	48	0	0	0	98.889	Arthropoda	Insecta	Coleoptera	Scirtidae	Prionocyphon	Arthropoda	Malacostraca	?	?	?	Panulirus ornatus	90	1
ASV1888	0	1	41	0	4	42	11	0	0	98.462	Arthropoda	Insecta	Coleoptera	Scirtidae		Cercozoa	?	?	?	?	?	65	1
ASV2640	0	8	40	0	0	0	1	0	0	96.552	Arthropoda	Insecta	Coleoptera	Scirtidae	Prionocyphon	?	?	?	?	?	?	87	3
ASV2636	0	0	49	0	0	0	0	0	0	96.552	Arthropoda	Insecta	Coleoptera	Scirtidae		Ciliophora	Intramacronucleata	Conthreep	?	?	?	87	3
ASV2901	9	0	18	0	2	0	5	3	2	96.552	Arthropoda	Insecta	Coleoptera	Scirtidae								87	3
ASV2631	0	0	0	34	16	0	0	0	0	94.318	Arthropoda	Insecta	Coleoptera	Scirtidae	Prionocyphon							88	5
ASV2568	0	0	0	38	15	0	0	0	0	93.421	Arthropoda	Insecta	Coleoptera	Scirtidae	Prionocyphon							76	5
ASV1893	0	0	0	15	57	26	0	0	0	93.258	Arthropoda	Insecta	Coleoptera	Scirtidae								89	6
ASV1619	0	0	0	38	55	37	0	0	0	90.551	Arthropoda	Insecta	Coleoptera	Scirtidae	Contacyphon	Arthropoda	Insecta	Psocoptera	?	?	?	254	20
ASV1172	0	5	33	8	17	0	76	43	69	82.283	Arthropoda	Insecta	Coleoptera	Scirtidae		Centrohelida	?	?	?	?	?	254	31
ASV1669	0	2	21	2	4	0	43	21	30	82.258	Arthropoda	Insecta	Coleoptera	Scirtidae		Centrohelida	?	?	?	?	?	248	30
ASV1707	0	2	24	0	9	0	37	20	26	82.143	Arthropoda	Insecta	Coleoptera	Scirtidae		Centrohelida	?	?	?	?	?	252	31
ASV1954	2	5	15	0	2	0	26	12	30	81.567	Arthropoda	Insecta	Coleoptera	Scirtidae		?	?	?	?	?	?	217	35
ASV2622	10	4	4	0	0	0	16	9	7	81.395	Arthropoda	Insecta	Coleoptera	Scirtidae		?	?	?	?	?	?	215	35
ASV308	52	654	93	201	1090	276	17	0	0	81.004	Arthropoda	Insecta	Coleoptera	Scirtidae		Ciliophora	Intramacronucleata	Conthreep	Phyllopharyngea	?	?	279	35
ASV247	0	1	0	468	2011	769	33	37	53	80.935	Arthropoda	Insecta	Coleoptera	Scirtidae		Ciliophora	Intramacronucleata	Conthreep	Phyllopharyngea	?	?	278	37
ASV353	0	0	0	362	1148	345	23	43	43	80.435	Arthropoda	Insecta	Coleoptera	Scirtidae		Ciliophora	Intramacronucleata	Conthreep	Phyllopharyngea	?	?	276	38
ASV620	0	136	674	0	0	0	0	0	0	90.837	Arthropoda	Insecta	Diptera	Ceratopogonidae	Atrichopogon	Arthropoda	Insecta	Diptera	?	?	Culex territans	251	18
ASV783	0	52	487	7	0	0	0	0	0	90.438	Arthropoda	Insecta	Diptera	Ceratopogonidae	Atrichopogon	Arthropoda	Insecta	Diptera	?	?	Culex territans	251	19
ASV1318	0	3	0	48	140	0	0	0	0	80.216	Arthropoda	Insecta	Diptera	Ceratopogonidae	Brachypogon	Ciliophora	Intramacronucleata	Conthreep	?	?	?	278	35
ASV2172	6	0	31	20	3	16	0	0	0	100	Arthropoda	Insecta	Diptera	Chironomidae	Tanytarsus	Arthropoda	Insecta	Diptera	?	?	?	250	0
ASV1986	31	8	51	0	0	0	0	0	0	99.6	Arthropoda	Insecta	Diptera	Chironomidae	Psectrotanypus	Arthropoda	Insecta	Diptera	?	?	Ablabesmyia rhamphe	250	1
ASV2124	12	0	14	28	1	24	0	0	0	99.6	Arthropoda	Insecta	Diptera	Chironomidae	Tanytarsus	Arthropoda	Insecta	Diptera	?	?	?	250	1
ASV2169	11	3	23	20	2	17	0	0	0	99.6	Arthropoda	Insecta	Diptera	Chironomidae	Tanytarsus	Arthropoda	Insecta	Diptera	?	?	?	250	1
ASV1842	13	4	37	18	7	24	0	0	0	99.2	Arthropoda	Insecta	Diptera	Chironomidae	Tanytarsus	Arthropoda	Insecta	Diptera	?	?	?	250	2
ASV2569	6	2	17	16	2	10	0	0	0	98.79	Arthropoda	Insecta	Diptera	Chironomidae	Tanytarsus	Arthropoda	Insecta	Diptera	?	?	?	248	3
ASV2222	13	28	32	0	0	0	0	0	0	98.387	Arthropoda	Insecta	Diptera	Chironomidae	Apsectrotanypus	Arthropoda	Insecta	Diptera	?	?	?	248	2
ASV2027	26	0	60	0	0	0	0	0	0	97.211	Arthropoda	Insecta	Diptera	Chironomidae	Conchapelopia	Arthropoda	Insecta	Diptera	?	?	?	251	6
ASV896	1	58	365	0	0	0	0	0	0	95.413	Arthropoda	Insecta	Diptera	Chironomidae	Paramerina	Arthropoda	Insecta	Diptera	?	?	?	109	5
ASV1217	0	29	201	0	0	0	0	0	0	95.413	Arthropoda	Insecta	Diptera	Chironomidae	Paramerina	Arthropoda	Insecta	Diptera	?	?	?	109	5
ASV2542	0	0	0	4	38	12	0	0	0	90.698	Arthropoda	Insecta	Diptera	Chironomidae	Tanytarsus	?	?	?	?	?	?	86	8
ASV1996	0	0	0	47	23	19	0	0	0	87.261	Arthropoda	Insecta	Diptera	Chironomidae	Tanytarsus	?	?	?	?	?	?	157	20
ASV2860	2	2	0	16	0	20	0	0	0	86.875	Arthropoda	Insecta	Diptera	Chironomidae	Tanytarsus	Zoopagomycota	?	?	?	?	?	160	21
ASV1528	0	0	0	101	22	20	0	0	0	86.624	Arthropoda	Insecta	Diptera	Chironomidae	Tanytarsus	Ciliophora	?	?	?	?	?	157	21
ASV1322	0	0	0	13	149	28	0	0	0	86.335	Arthropoda	Insecta	Diptera	Chironomidae	Tanytarsus	Ciliophora	Intramacronucleata	Conthreep	Plagiopylea	?	?	161	17
ASV1754	0	0	0	4	99	9	0	0	0	86.335	Arthropoda	Insecta	Diptera	Chironomidae	Tanytarsus	Ciliophora	Intramacronucleata	Conthreep	Plagiopylea	?	?	161	17
ASV1656	0	0	0	9	101	15	0	0	0	86.164	Arthropoda	Insecta	Diptera	Chironomidae	Tanytarsus	Ciliophora	Intramacronucleata	Conthreep	Plagiopylea	?	?	159	17
ASV2690	0	0	0	10	36	1	0	0	0	85.625	Arthropoda	Insecta	Diptera	Chironomidae	Tanytarsus	Ciliophora	Intramacronucleata	Conthreep	Plagiopylea	?	?	160	19
ASV1861	0	0	0	0	0	0	0	48	54	84.049	Arthropoda	Insecta	Diptera	Chironomidae	Dicrotendipes							163	19
ASV908	0	47	361	0	0	0	0	0	0	82.806	Arthropoda	Insecta	Diptera	Chironomidae	Apsectrotanypus	Arthropoda	Insecta	Diptera	?	?	?	506	59
ASV2875	0	0	0	0	10	0	30	0	0	82.39	Arthropoda	Insecta	Diptera	Chironomidae	Tanytarsus	Ciliophora	Intramacronucleata	Conthreep	Plagiopylea	?	?	159	23
ASV1176	0	85	164	0	0	0	0	0	0	98.75	Arthropoda	Insecta	Hemiptera	Corixidae	Sigara	Dinoflagellata	Dinophyceae	Gymnodiniphycidae	Suessiaceae	?	?	80	1
ASV1107	0	0	0	25	45	206	0	0	0	93.5	Arthropoda	Insecta	Hemiptera	Corixidae	Sigara	Arthropoda	Insecta	Hemiptera	?	?	?	200	12
ASV890	0	0	0	47	89	295	0	0	0	91.667	Arthropoda	Insecta	Hemiptera	Corixidae	Sigara	Arthropoda	Insecta	Hemiptera	?	?	?	252	16
ASV2259	0	0	0	18	3	45	0	0	4	95.89	Arthropoda	Insecta	Hemiptera	Gerridae	Gerris	Cercozoa	Vampyrellidae	?	?	?	?	73	3
ASV1184	70	65	36	41	23	0	10	0	0	89.412	Arthropoda	Insecta	Hemiptera	Gerridae	Metrobates	Cercozoa	?	?	?	?	?	85	9
ASV1697	25	49	15	11	19	0	0	0	0	89.412	Arthropoda	Insecta	Hemiptera	Gerridae	Metrobates	Cercozoa	?	?	?	?	?	85	9
ASV2387	14	22	11	7	3	0	5	0	0	89.412	Arthropoda	Insecta	Hemiptera	Gerridae	Metrobates	Cercozoa	?	?	?	?	?	85	9
ASV2046	0	0	0	37	38	5	0	4	0	98.864	Arthropoda	Insecta	Odonata	Aeshnidae	Anax	Centrohelida	?	?	?	?	uncultured eukaryote	88	1
ASV2545	0	0	0	0	0	0	8	12	34	98.864	Arthropoda	Insecta	Odonata	Aeshnidae	Anax	Centrohelida	?	?	?	?	?	88	1
ASV2119	0	0	0	50	20	9	0	0	0	97.802	Arthropoda	Insecta	Odonata	Aeshnidae	Anax							91	2
ASV1560	13	14	9	12	0	16	27	20	25	97.727	Arthropoda	Insecta	Odonata	Aeshnidae	Anax	?	?	?	?	?	?	88	2
ASV2045	0	0	0	26	44	8	0	4	2	97.727	Arthropoda	Insecta	Odonata	Aeshnidae	Anax	Centrohelida	?	?	?	?	uncultured eukaryote	88	2
ASV2521	0	0	4	0	0	0	10	14	27	97.727	Arthropoda	Insecta	Odonata	Aeshnidae	Anax	Centrohelida	?	?	?	?	?	88	2
ASV1687	0	0	0	68	34	19	0	0	0	96.703	Arthropoda	Insecta	Odonata	Aeshnidae	Anax							91	3
ASV2551	0	0	0	41	8	5	0	0	0	96.703	Arthropoda	Insecta	Odonata	Aeshnidae	Anax							91	3
ASV2859	40	0	0	0	0	0	0	0	0	99.6	Arthropoda	Insecta	Odonata	Coenagrionidae	Ischnura	Arthropoda	Insecta	Odonata	?	?	?	250	1
ASV970	21	0	0	35	150	135	18	0	0	91.351	Arthropoda	Insecta	Odonata	Coenagrionidae	Azuragrion	Gastrotricha	?	Chaetonotida	?	?	Polymerurus nodicaudus	185	13
ASV127	379	5059	3727	0	0	0	0	0	0	99.793	Arthropoda	Insecta	Odonata	Lestidae	Indolestes	Arthropoda	Insecta	Odonata	?	?	Indolestes cyaneus	483	1
ASV113	353	5358	4798	0	1	0	0	0	0	99.585	Arthropoda	Insecta	Odonata	Lestidae	Indolestes	Arthropoda	Insecta	Odonata	?	?	Indolestes cyaneus	482	2
ASV95	485	6648	7124	156	126	511	0	0	0	99.168	Arthropoda	Insecta	Odonata	Lestidae	Indolestes	Arthropoda	Insecta	Odonata	?	?	Indolestes cyaneus	481	3
ASV1743	5	0	101	0	1	5	0	0	1	89.068	Arthropoda	Insecta	Odonata	Lestidae	Indolestes	Gastrotricha	?	?	?	?	?	311	30
ASV1343	3	0	2	1	4	9	160	1	4	88.106	Arthropoda	Insecta	Odonata	Lestidae	Indolestes	Gastrotricha	?	?	?	?	?	227	24
ASV714	0	0	1	132	96	401	0	0	0	100	Arthropoda	Insecta	Odonata	Libellulidae	Allorrhizucha	Arthropoda	Insecta	Odonata	?	?	?	481	0
ASV784	0	0	3	87	38	417	0	0	0	99.378	Arthropoda	Insecta	Odonata	Libellulidae	Allorrhizucha	Arthropoda	Insecta	Odonata	?	?	?	482	3
ASV1787	0	0	0	48	33	28	0	0	0	99.2	Arthropoda	Insecta	Odonata	Libellulidae	Allorrhizucha	Arthropoda	Insecta	Odonata	?	?	?	250	2
ASV792	0	5	535	0	0	0	0	1	1	98.755	Arthropoda	Insecta	Odonata	Libellulidae	Allorrhizucha	Arthropoda	Insecta	Odonata	?	?	?	482	6
ASV920	0	2	389	0	0	0	0	3	2	98.4	Arthropoda	Insecta	Odonata	Libellulidae	Allorrhizucha	Arthropoda	Insecta	Odonata	?	?	?	250	4
ASV1031	74	4	2	0	0	0	10	94	131	96.703	Arthropoda	Insecta	Odonata	Libellulidae	Acisoma	Ciliophora	?	?	?	?	?	91	3
ASV2869	40	0	0	0	0	0	0	0	0	96.703	Arthropoda	Insecta	Odonata	Libellulidae	Acisoma	Gracilipodida	?	?	?	?	?	91	3
ASV1741	98	0	16	0	0	0	0	0	0	95.604	Arthropoda	Insecta	Odonata	Libellulidae	Acisoma	Cryptomycota	?	?	?	?	?	91	4
ASV2048	80	0	4	0	0	0	0	0	0	95.604	Arthropoda	Insecta	Odonata	Libellulidae	Acisoma	Cryptomycota	?	?	?	?	?	91	4
ASV1519	141	0	3	0	0	0	0	0	0	94.505	Arthropoda	Insecta	Odonata	Libellulidae	Acisoma	?	?	?	?	?	?	91	5
ASV2433	43	3	0	0	0	0	0	3	10	94.505	Arthropoda	Insecta	Odonata	Libellulidae	Acisoma	Cryptomycota	?	?	?	?	?	91	5
ASV582	2	24	883	0	0	1	0	3	0	93.509	Arthropoda	Insecta	Odonata	Libellulidae	Celithemis	Arthropoda	Insecta	Odonata	?	?	?	493	20
ASV1136	25	239	0	0	0	0	0	0	0	83.333	Arthropoda	Insecta	Odonata	Libellulidae	Sympetrum	Microsporidia	?	?	?	?	?	84	14
ASV2856	0	0	0	0	14	26	0	0	0	95.349	Arthropoda	Insecta	Trichoptera	Hydroptilidae	Oxyethira							86	4
ASV2316	0	0	0	54	13	0	0	0	0	94.186	Arthropoda	Insecta	Trichoptera	Hydroptilidae	Oxyethira							86	5
ASV2006	26	8	45	0	2	0	3	0	4	84.158	Arthropoda	Insecta	Trichoptera	Hydroptilidae	Anchitrichia	Zoopagomycota	Incertae Sedis	Harpellales	?	Furculomyces	Furculomyces boomerangus	202	26
ASV1283	0	0	0	52	152	0	0	0	0	80.727	Arthropoda	Insecta	Trichoptera	Hydroptilidae	Byrsopteryx	Ciliophora	Intramacronucleata	Conthreep	?	?	?	275	34
ASV842	0	6	0	161	306	0	0	0	0	80.435	Arthropoda	Insecta	Trichoptera	Hydroptilidae	Byrsopteryx	Ciliophora	Intramacronucleata	Conthreep	?	?	?	276	35
ASV1477	0	1	0	63	88	0	0	0	0	80.364	Arthropoda	Insecta	Trichoptera	Hydroptilidae	Byrsopteryx	Ciliophora	Intramacronucleata	Conthreep	?	?	?	275	35
ASV257	0	0	0	588	1845	652	31	31	64	79.859	Arthropoda	Insecta	Trichoptera	Hydroptilidae	Byrsopteryx	Ciliophora	Intramacronucleata	Conthreep	Phyllopharyngea	?	?	283	38
ASV1023	0	15	113	0	0	0	136	16	38	99.795	Arthropoda	Malacostraca	Decapoda	Parastacidae	Cherax	Arthropoda	Malacostraca	?	?	?	Cherax parvus	488	1
ASV1347	0	3	43	0	0	0	104	6	26	99.177	Arthropoda	Malacostraca	Decapoda	Parastacidae	Cherax	Arthropoda	Malacostraca	?	?	?	Cherax parvus	486	4
ASV1592	0	2	35	0	0	0	71	7	17	98.975	Arthropoda	Malacostraca	Decapoda	Parastacidae	Cherax	Arthropoda	Malacostraca	?	?	?	Cherax parvus	488	5
ASV1997	0	0	0	61	28	0	0	0	0	89.773	Arthropoda	Malacostraca	Decapoda	Parastacidae	Cherax	?	?	?	?	?	?	88	9
ASV1748	0	0	0	0	0	0	113	0	0	88.079	Arthropoda	Malacostraca	Decapoda	Parastacidae	Cherax	?	?	?	?	?	?	151	12
ASV2135	79	0	0	0	0	0	0	0	0	87.778	Arthropoda	Malacostraca	Decapoda	Parastacidae	Cherax	Microsporidia	?	?	?	?	?	90	11
ASV2267	69	0	0	0	0	0	0	0	0	87.778	Arthropoda	Malacostraca	Decapoda	Parastacidae	Cherax	Microsporidia	?	?	?	?	?	90	11
ASV2754	0	0	0	0	0	0	0	5	40	86.747	Arthropoda	Malacostraca	Decapoda	Parastacidae	Cherax	Microsporidia	?	?	?	?	?	83	11
ASV1838	0	47	0	0	0	0	14	22	21	86.667	Arthropoda	Malacostraca	Decapoda	Parastacidae	Cherax	Microsporidia	?	?	?	?	?	90	12
ASV355	0	1909	3	0	0	0	0	0	0	85.556	Arthropoda	Malacostraca	Decapoda	Parastacidae	Cherax	Microsporidia	?	?	?	?	?	90	13
ASV542	2	1016	5	0	0	0	0	0	0	85.556	Arthropoda	Malacostraca	Decapoda	Parastacidae	Cherax	Microsporidia	?	?	?	?	?	90	13
ASV646	38	708	0	0	0	0	0	0	0	85.556	Arthropoda	Malacostraca	Decapoda	Parastacidae	Cherax	Microsporidia	?	?	?	?	?	90	13
ASV1285	0	56	0	0	0	0	7	62	78	85.556	Arthropoda	Malacostraca	Decapoda	Parastacidae	Cherax	Microsporidia	?	?	?	?	?	90	13
ASV1434	11	149	0	0	0	0	0	0	0	85.556	Arthropoda	Malacostraca	Decapoda	Parastacidae	Cherax	Microsporidia	?	?	?	?	?	90	13
ASV196	0	0	0	499	842	3449	0	0	0	85.02	Arthropoda	Malacostraca	Decapoda	Parastacidae	Cherax	Arthropoda	Malacostraca	?	?	?	Panulirus ornatus	494	45
ASV135	0	0	0	879	1333	6355	2	0	0	84.49	Arthropoda	Malacostraca	Decapoda	Parastacidae	Cherax	Arthropoda	Malacostraca	?	?	?	Panulirus ornatus	490	47
ASV494	0	1186	3	0	0	0	0	0	0	84.444	Arthropoda	Malacostraca	Decapoda	Parastacidae	Cherax	Microsporidia	?	?	?	?	?	90	14
ASV1380	2	169	0	0	0	0	0	0	0	84.444	Arthropoda	Malacostraca	Decapoda	Parastacidae	Cherax	Microsporidia	?	?	?	?	?	90	14
ASV1664	0	0	0	0	0	0	2	55	67	84.259	Arthropoda	Malacostraca	Decapoda	Parastacidae	Cherax	Dinoflagellata	Dinophyceae	Gymnodiniphycidae	Suessiaceae	Biecheleria	?	216	29
ASV2486	0	5	7	15	22	0	7	0	1	83.182	Arthropoda	Malacostraca	Decapoda	Parastacidae	Cherax	?	?	?	?	?	?	220	29
ASV2111	0	0	0	6	7	67	0	0	0	81.418	Arthropoda	Malacostraca	Decapoda	Parastacidae	Cherax	Arthropoda	Malacostraca	?	?	?	Panulirus ornatus	409	47
ASV2330	0	0	0	22	25	19	0	0	0	100	Arthropoda	Malacostraca	Isopoda	Janiridae	Heterias	Arthropoda	Malacostraca	?	?	?	Heterias exul	250	0
ASV667	1	1	0	252	213	238	0	0	0	99.598	Arthropoda	Malacostraca	Isopoda	Janiridae	Heterias	Arthropoda	Malacostraca	?	?	?	Heterias exul	249	1
ASV76	30	34	89	17	3	0	11460	4005	5838	98.889	Arthropoda	Malacostraca	Isopoda	Janiridae	Heterias	?	?	?	?	?	?	90	0
ASV93	64	66	218	32	3	0	7774	3046	4005	97.802	Arthropoda	Malacostraca	Isopoda	Janiridae	Heterias	?	?	?	?	?	?	91	1
ASV118	1	29	23	0	0	0	5114	2295	2828	97.802	Arthropoda	Malacostraca	Isopoda	Janiridae	Heterias	?	?	?	?	?	?	91	1
ASV342	10	0	0	0	0	0	1047	490	507	97.802	Arthropoda	Malacostraca	Isopoda	Janiridae	Heterias	?	?	?	?	?	?	91	1
ASV2130	0	0	4	0	0	0	31	21	23	97.802	Arthropoda	Malacostraca	Isopoda	Janiridae	Heterias							91	1
ASV88	37	31	91	15	2	0	7419	4193	5244	97.753	Arthropoda	Malacostraca	Isopoda	Janiridae	Heterias	?	?	?	?	?	?	89	1
ASV87	59	41	109	27	5	0	8086	4049	5198	96.703	Arthropoda	Malacostraca	Isopoda	Janiridae	Heterias	?	?	?	?	?	?	91	2
ASV1935	14	0	1	13	28	4	33	1	0	95.402	Arthropoda	Malacostraca	Isopoda	Janiridae	Heterias							87	4
ASV1800	0	0	0	21	33	53	0	0	0	94.667	Arthropoda	Malacostraca	Isopoda	Janiridae	Heterias	Arthropoda	Malacostraca	?	?	?	?	150	7
ASV1040	3	0	6	106	48	137	5	0	2	94.521	Arthropoda	Malacostraca	Isopoda	Janiridae	Heterias							73	4
ASV2737	0	19	0	0	10	0	10	0	6	94.318	Arthropoda	Malacostraca	Isopoda	Janiridae	Heterias							88	5
ASV1392	38	1	0	14	59	4	45	1	7	94.253	Arthropoda	Malacostraca	Isopoda	Janiridae	Heterias	Euglenozoa	Diplonemea	?	?	?	?	87	5
ASV1204	5	0	5	55	68	100	3	0	1	93.151	Arthropoda	Malacostraca	Isopoda	Janiridae	Heterias							73	5
ASV1837	0	0	0	57	22	25	0	0	0	93.151	Arthropoda	Malacostraca	Isopoda	Janiridae	Heterias							73	5
ASV2200	0	0	0	17	33	24	0	0	0	90.11	Arthropoda	Malacostraca	Isopoda	Janiridae	Heterias	Nematozoa	Chromadorea	Rhabditida	?	?	Euteratocephalus palustris	91	7
ASV903	0	0	0	184	219	9	0	0	0	89.011	Arthropoda	Malacostraca	Isopoda	Janiridae	Heterias	Nematozoa	Chromadorea	Rhabditida	?	?	Euteratocephalus palustris	91	8
ASV1912	0	0	0	75	21	0	0	0	0	87.912	Arthropoda	Malacostraca	Isopoda	Janiridae	Heterias	Nematozoa	Chromadorea	Rhabditida	?	?	?	91	9
ASV766	0	0	0	135	430	0	0	0	0	87.5	Arthropoda	Malacostraca	Isopoda	Janiridae	Heterias	Cnidaria	Myxozoa	?	?	?	?	88	11
ASV1362	0	0	0	0	0	0	139	17	20	98.889	Arthropoda	Branchiopoda	Cladocera	Bosminidae	Bosmina							90	1
ASV89	0	0	0	0	0	0	16424	280	321	98.889	Arthropoda	Branchiopoda	Cladocera	Bosminidae	Bosmina							90	1
ASV354	0	0	0	0	0	0	1884	30	44	98.864	Arthropoda	Branchiopoda	Cladocera	Bosminidae	Bosmina							88	1
ASV151	0	0	0	0	0	0	2925	2150	2252	98.734	Arthropoda	Branchiopoda	Cladocera	Bosminidae	Bosmina							79	1
ASV405	0	1	0	0	0	0	497	504	552	98.701	Arthropoda	Branchiopoda	Cladocera	Bosminidae	Bosmina							77	1
ASV187	0	0	0	0	0	0	1561	1883	1593	97.778	Arthropoda	Branchiopoda	Cladocera	Bosminidae	Bosmina							90	2
ASV2885	0	0	0	0	0	0	12	20	7	94.382	Arthropoda	Branchiopoda	Cladocera	Bosminidae	Bosmina	Zoopagomycota	?	?	?	?	?	89	5
ASV2743	20	8	0	0	0	0	17	0	0	76.681	Arthropoda	Branchiopoda	Cladocera	Bosminidae	Bosmina	Cryptomycota	?	?	?	?	?	476	81
ASV1364	0	0	0	0	0	0	0	93	82	89.773	Arthropoda	Branchiopoda	Cladocera	Cercopagididae	Bythotrephes							88	9
ASV1962	0	0	0	0	0	0	1	46	45	89.773	Arthropoda	Branchiopoda	Cladocera	Cercopagididae	Bythotrephes							88	9
ASV720	209	30	380	3	0	0	0	0	0	98.4	Arthropoda	Branchiopoda	Cladocera	Chydoridae	Alonopsis	Arthropoda	Branchiopoda	Diplostraca	?	?	?	250	4
ASV917	287	23	91	0	0	0	0	0	0	96.121	Arthropoda	Branchiopoda	Cladocera	Chydoridae	Rhynchochydorus	Arthropoda	Branchiopoda	Diplostraca	?	?	?	232	5
ASV2430	0	0	0	48	9	3	0	0	0	96.063	Arthropoda	Branchiopoda	Cladocera	Chydoridae	Pseudochydorus	Arthropoda	Branchiopoda	Diplostraca	?	?	?	254	4
ASV1817	0	0	0	94	7	4	0	0	0	95.635	Arthropoda	Branchiopoda	Cladocera	Chydoridae	Pseudochydorus	Arthropoda	Branchiopoda	Diplostraca	?	?	?	252	5
ASV1361	82	3	92	0	0	0	0	0	0	93.689	Arthropoda	Branchiopoda	Cladocera	Chydoridae	Acroperus	Arthropoda	Branchiopoda	Diplostraca	?	?	?	206	10
ASV1256	110	15	90	0	0	0	0	0	0	93.204	Arthropoda	Branchiopoda	Cladocera	Chydoridae	Acroperus	Arthropoda	Branchiopoda	Diplostraca	?	?	?	206	11
ASV1714	0	0	0	105	9	3	0	0	0	84.951	Arthropoda	Branchiopoda	Cladocera	Chydoridae	Pleuroxus	Arthropoda	Branchiopoda	Diplostraca	?	?	?	206	21
ASV2178	0	0	0	69	7	0	0	0	0	84.466	Arthropoda	Branchiopoda	Cladocera	Chydoridae	Pleuroxus	Arthropoda	Branchiopoda	Diplostraca	?	?	?	206	22
ASV1336	2	12	42	0	4	0	110	6	10	98.925	Arthropoda	Branchiopoda	Cladocera	Daphniidae	Scapholeberis	Nucleariidae and Fonticula group	?	?	?	?	?	93	1
ASV1450	0	0	0	0	0	158	0	0	0	98.889	Arthropoda	Branchiopoda	Cladocera	Daphniidae	Scapholeberis	Ciliophora	Intramacronucleata	Litostomatea	Haptoria	Phialina	Lacrymaria marina	90	1
ASV1118	7	55	169	0	0	0	0	28	13	98.889	Arthropoda	Branchiopoda	Cladocera	Daphniidae	Scapholeberis	Protalveolata	Colpodellida	?	?	?	?	90	1
ASV1284	166	3	34	0	0	0	0	0	0	97.959	Arthropoda	Branchiopoda	Cladocera	Daphniidae	Daphnia	Arthropoda	Branchiopoda	Diplostraca	?	?	?	98	1
ASV1522	8	116	17	0	0	0	1	0	1	97.895	Arthropoda	Branchiopoda	Cladocera	Daphniidae	Scapholeberis	Cercozoa	Novel Clade 10	?	?	?	?	95	1
ASV1878	8	0	0	13	42	37	0	0	0	97.895	Arthropoda	Branchiopoda	Cladocera	Daphniidae	Scapholeberis	Cercozoa	Imbricatea	?	?	?	?	95	1
ASV1651	4	6	22	0	6	0	64	11	13	97.849	Arthropoda	Branchiopoda	Cladocera	Daphniidae	Scapholeberis	Nucleariidae and Fonticula group	?	?	?	?	?	93	2
ASV2381	49	12	2	0	0	0	0	0	0	97.849	Arthropoda	Branchiopoda	Cladocera	Daphniidae	Scapholeberis							93	2
ASV2145	0	7	8	0	2	0	53	4	4	97.802	Arthropoda	Branchiopoda	Cladocera	Daphniidae	Scapholeberis	?	Discosea	Dactylopodida	?	?	?	91	2
ASV1688	0	0	0	21	0	0	0	40	60	97.778	Arthropoda	Branchiopoda	Cladocera	Daphniidae	Scapholeberis	Cercozoa	?	?	?	?	?	90	2
ASV2100	0	0	0	28	49	1	2	0	0	97.778	Arthropoda	Branchiopoda	Cladocera	Daphniidae	Scapholeberis	Ciliophora	Intramacronucleata	Litostomatea	Haptoria	?	?	90	2
ASV2844	0	0	0	41	0	0	0	0	0	97.095	Arthropoda	Branchiopoda	Cladocera	Daphniidae	Scapholeberis	Arthropoda	Branchiopoda	Diplostraca	?	?	?	241	3
ASV1438	130	4	26	0	0	0	0	0	0	96.939	Arthropoda	Branchiopoda	Cladocera	Daphniidae	Daphnia	Arthropoda	Branchiopoda	Diplostraca	?	?	?	98	2
ASV1722	96	9	11	0	0	0	0	0	0	96.939	Arthropoda	Branchiopoda	Cladocera	Daphniidae	Daphnia	Arthropoda	Branchiopoda	Diplostraca	?	?	?	98	2
ASV1626	10	110	8	0	0	0	0	0	1	96.842	Arthropoda	Branchiopoda	Cladocera	Daphniidae	Scapholeberis	Cercozoa	Novel Clade 10	?	?	?	?	95	2
ASV2274	3	1	10	0	1	2	32	9	11	96.774	Arthropoda	Branchiopoda	Cladocera	Daphniidae	Scapholeberis	?	?	?	?	?	?	93	3
ASV1003	62	0	258	0	0	0	1	9	5	95.745	Arthropoda	Branchiopoda	Cladocera	Daphniidae	Scapholeberis							94	3
ASV1689	62	13	15	0	7	0	23	1	0	95.652	Arthropoda	Branchiopoda	Cladocera	Daphniidae	Scapholeberis	?	?	?	?	?	?	92	4
ASV534	0	0	0	202	149	356	336	1	8	92.763	Arthropoda	Branchiopoda	Cladocera	Daphniidae	Ceriodaphnia	Ciliophora	Intramacronucleata	Conthreep	Oligohymenophorea	?	?	152	11
ASV2020	13	0	0	33	15	25	0	0	0	92.748	Arthropoda	Branchiopoda	Cladocera	Daphniidae	Ceriodaphnia	Ascomycota	Saccharomycetes	Saccharomycetales	Debaryomycetaceae	Candida-Lodderomyces clade	Candida parapsilosis	262	17
ASV1724	17	70	0	15	5	2	5	2	0	92.279	Arthropoda	Branchiopoda	Cladocera	Daphniidae	Ceriodaphnia	Ascomycota	Sordariomycetes	Hypocreales	Hypocreaceae	Trichoderma	?	272	20
ASV1909	10	61	0	14	2	4	4	1	0	91.912	Arthropoda	Branchiopoda	Cladocera	Daphniidae	Ceriodaphnia	Ascomycota	Sordariomycetes	Hypocreales	Hypocreaceae	Trichoderma	?	272	21
ASV2837	0	0	41	0	0	0	0	0	0	91.781	Arthropoda	Branchiopoda	Cladocera	Daphniidae	Ceriodaphnia	Cryptomycota	?	?	?	?	?	146	12
ASV1959	15	20	53	1	2	1	0	0	0	91.756	Arthropoda	Branchiopoda	Cladocera	Daphniidae	Ceriodaphnia	Ascomycota	Sordariomycetes	Xylariales	?	Hyponectria	Hyponectria buxi	279	22
ASV756	66	0	301	184	0	0	0	28	3	91.503	Arthropoda	Branchiopoda	Cladocera	Daphniidae	Ceriodaphnia	Ciliophora	Intramacronucleata	Litostomatea	Haptoria	?	?	153	11
ASV359	5	48	41	206	1054	86	135	92	224	91.391	Arthropoda	Branchiopoda	Cladocera	Daphniidae	Ceriodaphnia	Ciliophora	Intramacronucleata	Armophorea	?	?	?	151	11
ASV1672	0	0	0	0	100	23	0	0	0	91.391	Arthropoda	Branchiopoda	Cladocera	Daphniidae	Ceriodaphnia	Ciliophora	Intramacronucleata	Litostomatea	Haptoria	?	Arcuospathidium sp.	151	11
ASV1955	0	0	0	20	69	0	3	0	0	91.391	Arthropoda	Branchiopoda	Cladocera	Daphniidae	Ceriodaphnia	Ciliophora	Intramacronucleata	Litostomatea	Haptoria	?	?	151	11
ASV2012	0	0	0	30	57	0	0	0	0	91.391	Arthropoda	Branchiopoda	Cladocera	Daphniidae	Ceriodaphnia	Ciliophora	Intramacronucleata	Litostomatea	Haptoria	?	?	151	11
ASV2870	0	30	0	0	10	0	0	0	0	91.333	Arthropoda	Branchiopoda	Cladocera	Daphniidae	Ceriodaphnia	?	?	?	?	?	?	150	13
ASV1011	0	0	0	0	0	0	0	121	208	91.333	Arthropoda	Branchiopoda	Cladocera	Daphniidae	Ceriodaphnia	Ciliophora	Intramacronucleata	Litostomatea	Haptoria	?	?	150	11
ASV1115	0	0	0	0	0	0	0	87	187	91.333	Arthropoda	Branchiopoda	Cladocera	Daphniidae	Ceriodaphnia	Ciliophora	Intramacronucleata	Litostomatea	Haptoria	?	?	150	11
ASV1728	0	0	0	49	0	66	0	0	0	91.321	Arthropoda	Branchiopoda	Cladocera	Daphniidae	Ceriodaphnia	Ascomycota	Saccharomycetes	Saccharomycetales	Metschnikowiaceae	Metschnikowia	uncultured eukaryote	265	22
ASV2218	5	1	0	18	10	39	0	0	0	91.288	Arthropoda	Branchiopoda	Cladocera	Daphniidae	Ceriodaphnia	Ascomycota	Saccharomycetes	Saccharomycetales	Metschnikowiaceae	Clavispora-Candida clade	[Candida] haemulonis	264	22
ASV2648	0	0	0	0	3	46	0	0	0	91.257	Arthropoda	Branchiopoda	Cladocera	Daphniidae	Ceriodaphnia	Ascomycota	Eurotiomycetes	Verrucariales	Verrucariaceae	?	?	183	15
ASV626	55	42	564	21	3	14	78	6	11	91.135	Arthropoda	Branchiopoda	Cladocera	Daphniidae	Ceriodaphnia	Ascomycota	Dothideomycetes	Pleosporales	Didymosphaeriaceae	?	?	282	22
ASV1511	55	0	82	0	0	0	0	9	0	91.083	Arthropoda	Branchiopoda	Cladocera	Daphniidae	Ceriodaphnia	Ciliophora	Intramacronucleata	Litostomatea	Haptoria	?	?	157	11
ASV801	47	26	240	64	2	25	112	8	8	91.071	Arthropoda	Branchiopoda	Cladocera	Daphniidae	Ceriodaphnia	Ascomycota	Dothideomycetes	Pleosporales	Didymosphaeriaceae	?	?	280	22
ASV2015	13	9	64	0	0	0	0	0	0	91.045	Arthropoda	Branchiopoda	Cladocera	Daphniidae	Scapholeberis	?	?	?	?	?	?	134	10
ASV1440	15	5	0	79	0	60	0	0	1	91.045	Arthropoda	Branchiopoda	Cladocera	Daphniidae	Ceriodaphnia	Ascomycota	Saccharomycetes	Saccharomycetales	Metschnikowiaceae	Metschnikowia	uncultured eukaryote	268	23
ASV1070	1	11	0	1	4	1	10	127	139	90.968	Arthropoda	Branchiopoda	Cladocera	Daphniidae	Ceriodaphnia	Ciliophora	Intramacronucleata	Conthreep	Oligohymenophorea	Protocyclidium	uncultured Scuticociliatia	155	14
ASV471	55	181	943	21	9	62	0	2	0	90.942	Arthropoda	Branchiopoda	Cladocera	Daphniidae	Ceriodaphnia	Ascomycota	Sordariomycetes	Hypocreales	?	?	?	276	23
ASV2436	0	0	0	54	5	0	0	0	0	90.941	Arthropoda	Branchiopoda	Cladocera	Daphniidae	Ceriodaphnia	Ascomycota	Saccharomycetes	Saccharomycetales	Trichomonascaceae	Trichomonascus	?	287	23
ASV1964	0	0	0	0	0	0	75	2	14	90.909	Arthropoda	Branchiopoda	Cladocera	Daphniidae	Ceriodaphnia	?	?	?	?	?	?	154	14
ASV2040	4	12	69	0	0	0	0	0	0	90.909	Arthropoda	Branchiopoda	Cladocera	Daphniidae	Ceriodaphnia	?	?	?	?	?	?	154	14
ASV821	27	50	36	108	16	261	1	0	0	90.909	Arthropoda	Branchiopoda	Cladocera	Daphniidae	Ceriodaphnia	Ascomycota	Sordariomycetes	Hypocreales	Ophiocordycipitaceae	Tolypocladium	Tolypocladium japonicum	275	24
ASV898	0	0	0	0	360	58	0	0	2	90.909	Arthropoda	Branchiopoda	Cladocera	Daphniidae	Ceriodaphnia	Ciliophora	Intramacronucleata	Litostomatea	Haptoria	?	?	154	12
ASV944	0	0	0	24	304	29	22	0	0	90.909	Arthropoda	Branchiopoda	Cladocera	Daphniidae	Ceriodaphnia	Ciliophora	Intramacronucleata	Litostomatea	Haptoria	?	?	154	12
ASV1934	0	0	3	0	4	0	0	16	71	90.909	Arthropoda	Branchiopoda	Cladocera	Daphniidae	Ceriodaphnia	Ciliophora	Intramacronucleata	Litostomatea	Haptoria	?	?	154	12
ASV1346	37	0	126	0	0	0	0	12	7	90.85	Arthropoda	Branchiopoda	Cladocera	Daphniidae	Ceriodaphnia	Ciliophora	Intramacronucleata	Litostomatea	Haptoria	Phialina	?	153	12
ASV2565	1	0	2	50	0	0	0	0	0	90.85	Arthropoda	Branchiopoda	Cladocera	Daphniidae	Ceriodaphnia	Ciliophora	Intramacronucleata	Litostomatea	Haptoria	?	?	153	12
ASV1708	0	0	0	79	3	35	0	0	0	90.789	Arthropoda	Branchiopoda	Cladocera	Daphniidae	Ceriodaphnia	?	Discosea	Centramoebida	?	Acanthamoeba	Acanthamoeba sp. SE2_6F	152	14
ASV832	15	0	199	0	0	0	14	109	148	90.789	Arthropoda	Branchiopoda	Cladocera	Daphniidae	Ceriodaphnia	Ciliophora	Intramacronucleata	Conthreep	Oligohymenophorea	?	?	152	14
ASV2036	0	0	0	0	0	0	2	23	60	90.789	Arthropoda	Branchiopoda	Cladocera	Daphniidae	Ceriodaphnia	Cryptomycota	Incertae Sedis	?	?	?	?	152	14
ASV8	11225	7469	89422	7815	801	2083	16072	1745	1885	90.78	Arthropoda	Branchiopoda	Cladocera	Daphniidae	Ceriodaphnia	Ascomycota	Dothideomycetes	Pleosporales	Didymosphaeriaceae	?	?	282	23
ASV680	29	36	467	33	8	14	83	6	14	90.78	Arthropoda	Branchiopoda	Cladocera	Daphniidae	Ceriodaphnia	Ascomycota	Dothideomycetes	Pleosporales	Didymosphaeriaceae	?	?	282	23
ASV996	26	14	237	15	4	8	27	2	7	90.78	Arthropoda	Branchiopoda	Cladocera	Daphniidae	Ceriodaphnia	Ascomycota	Dothideomycetes	Pleosporales	Didymosphaeriaceae	Pseudocamarosporium	Pseudocamarosporium africanum	282	23
ASV41	0	0	0	11426	22495	19201	0	0	0	90.728	Arthropoda	Branchiopoda	Cladocera	Daphniidae	Ceriodaphnia	Ciliophora	Intramacronucleata	Armophorea	?	?	?	151	14
ASV418	0	0	1383	84	28	0	0	6	2	90.728	Arthropoda	Branchiopoda	Cladocera	Daphniidae	Ceriodaphnia	Ciliophora	Intramacronucleata	Litostomatea	Haptoria	?	uncultured alveolate	151	12
ASV910	0	0	0	21	337	20	27	0	0	90.728	Arthropoda	Branchiopoda	Cladocera	Daphniidae	Ceriodaphnia	Ciliophora	Intramacronucleata	Litostomatea	Haptoria	?	?	151	12
ASV1760	0	0	0	4	108	0	0	0	0	90.728	Arthropoda	Branchiopoda	Cladocera	Daphniidae	Ceriodaphnia	Ciliophora	Intramacronucleata	Litostomatea	Haptoria	?	?	151	12
ASV2618	0	0	5	0	0	0	0	10	35	90.728	Arthropoda	Branchiopoda	Cladocera	Daphniidae	Ceriodaphnia	Ciliophora	Intramacronucleata	Litostomatea	Haptoria	?	Arcuospathidium cultriforme	151	12
ASV1103	0	0	0	0	279	0	0	0	0	90.667	Arthropoda	Branchiopoda	Cladocera	Daphniidae	Ceriodaphnia	Ciliophora	Intramacronucleata	Litostomatea	Haptoria	?	?	150	14
ASV683	64	30	463	32	0	6	66	10	13	90.614	Arthropoda	Branchiopoda	Cladocera	Daphniidae	Ceriodaphnia	Ascomycota	Dothideomycetes	Pleosporales	?	?	?	277	24
ASV23	0	0	0	14289	36380	27456	0	0	0	90.541	Arthropoda	Branchiopoda	Cladocera	Daphniidae	Ceriodaphnia	Ciliophora	Intramacronucleata	Armophorea	Armophorida	Metopus	?	148	14
ASV30	0	0	0	14615	29656	22854	0	0	1	90.541	Arthropoda	Branchiopoda	Cladocera	Daphniidae	Ceriodaphnia	Ciliophora	Intramacronucleata	Armophorea	Armophorida	?	?	148	14
ASV492	1	0	0	121	775	301	0	0	0	90.541	Arthropoda	Branchiopoda	Cladocera	Daphniidae	Ceriodaphnia	Ciliophora	Intramacronucleata	Armophorea	Armophorida	?	?	148	14
ASV1071	24	12	0	0	0	100	96	29	33	90.526	Arthropoda	Branchiopoda	Cladocera	Daphniidae	Scapholeberis	?	?	?	?	?	?	95	7
ASV604	38	33	620	33	2	8	108	5	15	90.526	Arthropoda	Branchiopoda	Cladocera	Daphniidae	Ceriodaphnia	Ascomycota	Dothideomycetes	Pleosporales	Didymosphaeriaceae	?	?	285	24
ASV649	52	28	488	49	2	11	82	10	16	90.526	Arthropoda	Branchiopoda	Cladocera	Daphniidae	Ceriodaphnia	Ascomycota	Dothideomycetes	Pleosporales	Didymosphaeriaceae	?	?	285	24
ASV678	42	34	478	35	5	7	82	4	7	90.526	Arthropoda	Branchiopoda	Cladocera	Daphniidae	Ceriodaphnia	Ascomycota	Dothideomycetes	Pleosporales	Didymosphaeriaceae	Pseudocamarosporium	Pseudocamarosporium africanum	285	24
ASV779	40	35	398	15	0	2	50	1	11	90.526	Arthropoda	Branchiopoda	Cladocera	Daphniidae	Ceriodaphnia	Ascomycota	Dothideomycetes	Pleosporales	Didymosphaeriaceae	?	?	285	24
ASV2067	4	8	46	3	0	6	15	0	1	90.526	Arthropoda	Branchiopoda	Cladocera	Daphniidae	Ceriodaphnia	Ascomycota	Dothideomycetes	Pleosporales	Didymosphaeriaceae	Paraphaeosphaeria	Paraphaeosphaeria neglecta	285	24
ASV1987	32	18	35	1	2	0	2	0	0	90.476	Arthropoda	Branchiopoda	Cladocera	Daphniidae	Scapholeberis	Ascomycota	?	?	?	?	?	147	13
ASV251	297	179	2252	140	7	63	310	23	29	90.459	Arthropoda	Branchiopoda	Cladocera	Daphniidae	Ceriodaphnia	Ascomycota	Dothideomycetes	Pleosporales	Didymosphaeriaceae	Pseudocamarosporium	Pseudocamarosporium africanum	283	23
ASV2790	4	0	12	0	21	0	0	6	0	90.411	Arthropoda	Branchiopoda	Cladocera	Daphniidae	Scapholeberis	Ascomycota	Dothideomycetes	Pleosporales	?	?	?	146	9
ASV1777	0	0	0	0	0	0	105	0	5	90.299	Arthropoda	Branchiopoda	Cladocera	Daphniidae	Ceriodaphnia	?	?	?	?	?	?	268	24
ASV326	402	325	818	0	0	0	193	212	248	90.265	Arthropoda	Branchiopoda	Cladocera	Daphniidae	Ceriodaphnia	?	?	?	?	?	?	113	11
ASV849	0	0	426	32	7	0	0	0	0	90.26	Arthropoda	Branchiopoda	Cladocera	Daphniidae	Ceriodaphnia	Ciliophora	Intramacronucleata	Litostomatea	Haptoria	?	uncultured alveolate	154	13
ASV2136	0	0	0	0	0	78	0	0	0	90.26	Arthropoda	Branchiopoda	Cladocera	Daphniidae	Ceriodaphnia	Ciliophora	Intramacronucleata	Litostomatea	Haptoria	Phialina	?	154	13
ASV1324	70	0	9	0	0	0	13	42	55	90.189	Arthropoda	Branchiopoda	Cladocera	Daphniidae	Ceriodaphnia	Ascomycota	Dothideomycetes	Capnodiales	?	?	?	265	24
ASV1342	0	0	0	0	0	0	16	38	131	90.132	Arthropoda	Branchiopoda	Cladocera	Daphniidae	Ceriodaphnia	?	?	?	?	?	?	152	13
ASV56	0	0	4	4244	31402	2969	0	0	0	90.132	Arthropoda	Branchiopoda	Cladocera	Daphniidae	Ceriodaphnia	Ciliophora	Intramacronucleata	Armophorea	Armophorida	?	?	152	15
ASV2615	0	0	0	0	0	0	1	29	20	90.132	Arthropoda	Branchiopoda	Cladocera	Daphniidae	Ceriodaphnia	Cryptomycota	Incertae Sedis	?	?	?	?	152	15
ASV19	11	1	68	8295	68705	5572	0	0	0	90.066	Arthropoda	Branchiopoda	Cladocera	Daphniidae	Ceriodaphnia	Ciliophora	Intramacronucleata	Armophorea	Armophorida	?	?	151	15
ASV134	2	0	0	822	4832	1394	1611	0	0	90.066	Arthropoda	Branchiopoda	Cladocera	Daphniidae	Ceriodaphnia	Ciliophora	Intramacronucleata	Armophorea	Armophorida	?	?	151	15
ASV1074	0	28	0	0	0	0	0	78	186	90.066	Arthropoda	Branchiopoda	Cladocera	Daphniidae	Ceriodaphnia	Ciliophora	Intramacronucleata	Litostomatea	Haptoria	?	?	151	13
ASV1660	0	0	0	1	0	0	124	0	0	90.066	Arthropoda	Branchiopoda	Cladocera	Daphniidae	Ceriodaphnia	Ciliophora	Intramacronucleata	Armophorea	Armophorida	?	?	151	15
ASV521	191	132	327	302	7	44	38	18	38	90.036	Arthropoda	Branchiopoda	Cladocera	Daphniidae	Ceriodaphnia	Ascomycota	Eurotiomycetes	Phaeomoniellales	Incertae Sedis	Neophaeomoniella	Neophaeomoniella zymoides	281	25
ASV1863	35	5	21	36	0	0	2	0	2	90.036	Arthropoda	Branchiopoda	Cladocera	Daphniidae	Ceriodaphnia	Ascomycota	Eurotiomycetes	Chaetothyriales	Herpotrichiellaceae	?	?	281	26
ASV579	80	11	120	530	33	108	32	3	2	89.865	Arthropoda	Branchiopoda	Cladocera	Daphniidae	Scapholeberis	Ascomycota	Dothideomycetes	Pleosporales	Pleosporaceae	?	?	148	11
ASV20	0	0	0	15643	38736	26740	0	0	2	89.865	Arthropoda	Branchiopoda	Cladocera	Daphniidae	Ceriodaphnia	Ciliophora	Intramacronucleata	Armophorea	?	?	?	148	15
ASV1169	0	0	0	0	19	0	233	0	0	89.865	Arthropoda	Branchiopoda	Cladocera	Daphniidae	Ceriodaphnia	Ciliophora	Intramacronucleata	Armophorea	Armophorida	?	?	148	15
ASV763	80	72	106	133	18	69	31	22	36	89.68	Arthropoda	Branchiopoda	Cladocera	Daphniidae	Ceriodaphnia	Ascomycota	Eurotiomycetes	Phaeomoniellales	Incertae Sedis	Neophaeomoniella	Neophaeomoniella zymoides	281	26
ASV1405	3	6	19	0	1	3	98	15	21	89.677	Arthropoda	Branchiopoda	Cladocera	Daphniidae	Ceriodaphnia	?	?	?	?	?	?	155	16
ASV450	6	0	25	111	1063	149	0	0	0	89.677	Arthropoda	Branchiopoda	Cladocera	Daphniidae	Ceriodaphnia	Ciliophora	Intramacronucleata	Armophorea	Armophorida	?	?	155	16
ASV2811	0	0	0	0	0	0	0	17	25	89.677	Arthropoda	Branchiopoda	Cladocera	Daphniidae	Ceriodaphnia	Cryptomycota	Incertae Sedis	?	?	?	?	155	16
ASV2358	0	0	0	0	0	0	3	22	39	89.677	Arthropoda	Branchiopoda	Cladocera	Daphniidae	Ceriodaphnia	Mucoromycota	Glomeromycetes	Glomerales	?	?	?	155	14
ASV1900	9	24	25	7	4	27	0	0	2	89.606	Arthropoda	Branchiopoda	Cladocera	Daphniidae	Ceriodaphnia	Ascomycota	Taphrinomycetes	Taphrinales	Taphrinaceae	Taphrina	?	279	28
ASV2688	0	0	0	47	0	0	0	0	0	89.606	Arthropoda	Branchiopoda	Cladocera	Daphniidae	Ceriodaphnia	Ascomycota	Sordariomycetes	Sordariales	Chaetomiaceae	Chaetomium	Chaetomium elatum	279	28
ASV1259	3	0	0	79	60	71	0	0	0	89.474	Arthropoda	Branchiopoda	Cladocera	Daphniidae	Ceriodaphnia	?	?	?	?	?	?	152	16
ASV2441	0	0	0	7	0	52	0	0	0	89.474	Arthropoda	Branchiopoda	Cladocera	Daphniidae	Scapholeberis	?	?	?	?	?	?	133	10
ASV703	0	0	606	38	4	0	0	0	0	89.404	Arthropoda	Branchiopoda	Cladocera	Daphniidae	Ceriodaphnia	Ciliophora	Intramacronucleata	Litostomatea	Haptoria	?	?	151	14
ASV819	0	0	0	0	20	0	486	0	0	89.404	Arthropoda	Branchiopoda	Cladocera	Daphniidae	Ceriodaphnia	Ciliophora	Intramacronucleata	Armophorea	Armophorida	?	?	151	16
ASV1463	66	6	40	39	0	0	3	0	0	89.324	Arthropoda	Branchiopoda	Cladocera	Daphniidae	Ceriodaphnia	Ascomycota	Eurotiomycetes	Chaetothyriales	Herpotrichiellaceae	Exophiala	Exophiala nigra	281	27
ASV1160	70	17	168	0	0	0	0	0	1	89.286	Arthropoda	Branchiopoda	Cladocera	Daphniidae	Ceriodaphnia	Ascomycota	Eurotiomycetes	Chaetothyriales	Herpotrichiellaceae	Exophiala	?	280	27
ASV1404	80	55	28	4	0	0	0	0	0	89.286	Arthropoda	Branchiopoda	Cladocera	Daphniidae	Ceriodaphnia	Ascomycota	Eurotiomycetes	Chaetothyriales	Herpotrichiellaceae	Exophiala	?	280	27
ASV1247	0	0	0	0	0	0	214	0	4	89.209	Arthropoda	Branchiopoda	Cladocera	Daphniidae	Ceriodaphnia	Chytridiomycota	Chytridiomycetes	?	?	?	?	278	27
ASV1803	0	0	0	36	15	55	0	0	0	89.209	Arthropoda	Branchiopoda	Cladocera	Daphniidae	Ceriodaphnia	Chytridiomycota	Chytridiomycetes	?	?	?	?	278	27
ASV2834	0	0	0	0	0	0	2	12	27	89.13	Arthropoda	Branchiopoda	Cladocera	Daphniidae	Ceriodaphnia	Chytridiomycota	Chytridiomycetes	?	?	?	?	276	28
ASV1132	11	11	96	81	18	40	8	0	0	89.055	Arthropoda	Branchiopoda	Cladocera	Daphniidae	Ceriodaphnia	Ascomycota	Eurotiomycetes	Chaetothyriales	Herpotrichiellaceae	?	?	201	20
ASV2903	0	6	0	0	0	0	10	8	15	88.971	Arthropoda	Branchiopoda	Cladocera	Daphniidae	Ceriodaphnia	?	?	?	?	?	?	272	28
ASV2645	0	4	17	7	16	0	4	1	0	88.968	Arthropoda	Branchiopoda	Cladocera	Daphniidae	Ceriodaphnia	Ascomycota	Eurotiomycetes	Chaetothyriales	Herpotrichiellaceae	?	?	281	28
ASV1183	96	62	72	11	0	0	0	3	1	88.929	Arthropoda	Branchiopoda	Cladocera	Daphniidae	Ceriodaphnia	Ascomycota	Eurotiomycetes	Chaetothyriales	Herpotrichiellaceae	Exophiala	?	280	28
ASV1782	2	7	26	13	5	0	45	9	3	88.929	Arthropoda	Branchiopoda	Cladocera	Daphniidae	Ceriodaphnia	Ascomycota	Eurotiomycetes	Chaetothyriales	Herpotrichiellaceae	Cladophialophora	Cladophialophora australiensis	280	28
ASV940	11	15	17	184	111	31	5	1	6	88.929	Arthropoda	Branchiopoda	Cladocera	Daphniidae	Ceriodaphnia	Chytridiomycota	Chytridiomycetes	?	?	?	?	280	30
ASV1548	13	12	26	11	3	72	0	0	1	88.889	Arthropoda	Branchiopoda	Cladocera	Daphniidae	Ceriodaphnia	Ascomycota	Taphrinomycetes	Taphrinales	Taphrinaceae	Taphrina	?	279	30
ASV2888	13	4	22	0	0	0	0	0	0	88.889	Arthropoda	Branchiopoda	Cladocera	Daphniidae	Ceriodaphnia	Chytridiomycota	Chytridiomycetes	?	?	?	?	270	28
ASV2586	0	23	29	0	0	0	0	0	0	88.889	Arthropoda	Branchiopoda	Cladocera	Daphniidae	Ceriodaphnia	Cryptomycota	Incertae Sedis	?	?	?	?	153	17
ASV433	0	0	1253	0	0	0	10	48	136	88.889	Arthropoda	Branchiopoda	Cladocera	Daphniidae	Ceriodaphnia							135	15
ASV1146	0	0	94	0	0	0	7	65	95	88.889	Arthropoda	Branchiopoda	Cladocera	Daphniidae	Ceriodaphnia							135	15
ASV1223	0	0	0	0	0	0	2	95	131	88.889	Arthropoda	Branchiopoda	Cladocera	Daphniidae	Ceriodaphnia							135	15
ASV923	40	88	265	0	0	0	0	0	0	88.809	Arthropoda	Branchiopoda	Cladocera	Daphniidae	Ceriodaphnia	Chytridiomycota	Chytridiomycetes	?	?	?	?	277	27
ASV2599	16	0	10	0	0	0	2	11	12	88.768	Arthropoda	Branchiopoda	Cladocera	Daphniidae	Ceriodaphnia	?	?	?	?	?	?	276	29
ASV488	0	0	0	417	348	449	0	0	0	88.764	Arthropoda	Branchiopoda	Cladocera	Daphniidae	Ceriodaphnia	Cercozoa	?	?	?	?	?	267	24
ASV1422	33	20	108	0	0	0	0	0	1	88.732	Arthropoda	Branchiopoda	Cladocera	Daphniidae	Ceriodaphnia	Ascomycota	Eurotiomycetes	Chaetothyriales	Chaetothyriaceae	?	?	284	29
ASV858	13	2	77	2	0	0	327	9	26	88.603	Arthropoda	Branchiopoda	Cladocera	Daphniidae	Ceriodaphnia	Chytridiomycota	Chytridiomycetes	?	?	?	?	272	29
ASV1251	0	0	212	0	5	0	0	0	0	88.603	Arthropoda	Branchiopoda	Cladocera	Daphniidae	Ceriodaphnia	Chytridiomycota	Chytridiomycetes	Spizellomycetales	Powellomycetaceae	?	?	272	29
ASV2536	0	0	0	35	0	20	0	0	0	88.571	Arthropoda	Branchiopoda	Cladocera	Daphniidae	Ceriodaphnia	Ascomycota	Eurotiomycetes	Chaetothyriales	Trichomeriaceae	Knufia	Knufia petricola	280	29
ASV1469	9	0	0	0	0	0	39	44	61	88.571	Arthropoda	Branchiopoda	Cladocera	Daphniidae	Ceriodaphnia	Chytridiomycota	Chytridiomycetes	Chytridiales	Chytriomycetaceae	?	?	280	30
ASV329	188	314	548	34	2	12	521	272	282	88.561	Arthropoda	Branchiopoda	Cladocera	Daphniidae	Ceriodaphnia	?	?	?	?	?	?	271	27
ASV432	45	300	399	36	44	14	191	163	255	88.561	Arthropoda	Branchiopoda	Cladocera	Daphniidae	Ceriodaphnia	?	Choanoflagellida	Codonosigidae	?	Monosiga	Monosiga ovata	271	28
ASV1616	12	18	34	0	0	0	39	12	15	88.561	Arthropoda	Branchiopoda	Cladocera	Daphniidae	Ceriodaphnia	?	Choanoflagellida	Codonosigidae	?	Monosiga	Monosiga ovata	271	28
ASV2247	0	63	0	0	0	0	5	2	1	88.561	Arthropoda	Branchiopoda	Cladocera	Daphniidae	Ceriodaphnia	?	?	?	?	?	?	271	28
ASV1781	0	0	0	24	20	66	0	0	0	88.55	Arthropoda	Branchiopoda	Cladocera	Daphniidae	Ceriodaphnia	Chytridiomycota	Chytridiomycetes	?	?	?	?	262	27
ASV1356	9	4	0	0	0	0	70	30	65	88.489	Arthropoda	Branchiopoda	Cladocera	Daphniidae	Ceriodaphnia	Chytridiomycota	Chytridiomycetes	Chytridiales	Chytriomycetaceae	?	?	278	29
ASV725	9	0	13	58	516	23	0	0	0	88.485	Arthropoda	Branchiopoda	Cladocera	Daphniidae	Ceriodaphnia	Ciliophora	Intramacronucleata	Armophorea	Armophorida	?	?	165	18
ASV1827	1	3	29	43	0	29	0	0	0	88.421	Arthropoda	Branchiopoda	Cladocera	Daphniidae	Ceriodaphnia	Ascomycota	Dothideomycetes	Pleosporales	Didymosphaeriaceae	Bimuria	Bimuria novae-zelandiae	285	29
ASV1428	19	69	4	22	28	0	8	9	2	88.406	Arthropoda	Branchiopoda	Cladocera	Daphniidae	Ceriodaphnia	?	?	?	?	?	?	276	30
ASV2065	23	43	4	4	1	0	1	5	2	88.406	Arthropoda	Branchiopoda	Cladocera	Daphniidae	Ceriodaphnia	?	?	?	?	?	?	276	30
ASV107	1	0	0	2428	5835	2933	0	0	0	88.387	Arthropoda	Branchiopoda	Cladocera	Daphniidae	Ceriodaphnia	Ciliophora	Intramacronucleata	Armophorea	Armophorida	Metopus	?	155	18
ASV1810	0	22	84	0	0	0	0	0	0	88.38	Arthropoda	Branchiopoda	Cladocera	Daphniidae	Ceriodaphnia	Chytridiomycota	Chytridiomycetes	?	?	?	?	284	31
ASV2061	11	0	16	45	11	0	0	1	0	88.364	Arthropoda	Branchiopoda	Cladocera	Daphniidae	Ceriodaphnia	Ascomycota	Eurotiomycetes	Chaetothyriales	?	?	?	275	29
ASV915	0	0	397	0	5	0	0	0	0	88.364	Arthropoda	Branchiopoda	Cladocera	Daphniidae	Ceriodaphnia	Chytridiomycota	Chytridiomycetes	Spizellomycetales	Powellomycetaceae	?	?	275	30
ASV54	8008	4266	20736	2553	266	2593	729	474	565	88.339	Arthropoda	Branchiopoda	Cladocera	Daphniidae	Ceriodaphnia	Ascomycota	Eurotiomycetes	Eurotiales	Trichocomaceae	Talaromyces	Talaromyces aerugineus	283	31
ASV429	0	0	0	1362	40	59	0	0	0	88.339	Arthropoda	Branchiopoda	Cladocera	Daphniidae	Ceriodaphnia	Chytridiomycota	Chytridiomycetes	?	?	?	?	283	32
ASV1317	7	6	98	47	3	2	22	3	3	88.321	Arthropoda	Branchiopoda	Cladocera	Daphniidae	Ceriodaphnia	Ascomycota	Dothideomycetes	Pleosporales	Pleosporaceae	Alternaria	?	274	27
ASV2841	0	0	0	0	0	41	0	0	0	88.306	Arthropoda	Branchiopoda	Cladocera	Daphniidae	Ceriodaphnia	Ascomycota	Dothideomycetes	Pleosporales	?	?	?	248	27
ASV543	17	0	14	377	459	91	35	10	16	88.302	Arthropoda	Branchiopoda	Cladocera	Daphniidae	Ceriodaphnia	Chytridiomycota	Chytridiomycetes	Chytridiales	Chytriomycetaceae	Chytriomyces	?	265	28
ASV1383	5	9	0	47	5	42	16	22	25	88.298	Arthropoda	Branchiopoda	Cladocera	Daphniidae	Ceriodaphnia	Chytridiomycota	Chytridiomycetes	?	?	?	?	282	30
ASV2211	0	6	4	3	2	59	0	0	0	88.298	Arthropoda	Branchiopoda	Cladocera	Daphniidae	Ceriodaphnia	Mucoromycota	Incertae Sedis	Endogonales	Endogonaceae	?	?	282	31
ASV1444	0	0	0	45	19	95	0	0	0	88.256	Arthropoda	Branchiopoda	Cladocera	Daphniidae	Ceriodaphnia	Ascomycota	Eurotiomycetes	Chaetothyriales	?	?	?	281	30
ASV2774	0	0	0	0	0	44	0	0	0	88.256	Arthropoda	Branchiopoda	Cladocera	Daphniidae	Ceriodaphnia	Ascomycota	Eurotiomycetes	Chaetothyriales	Trichomeriaceae	?	?	281	30
ASV875	28	15	39	0	0	0	148	114	100	88.235	Arthropoda	Branchiopoda	Cladocera	Daphniidae	Ceriodaphnia	?	Choanoflagellida	?	?	?	?	272	27
ASV1483	0	2	26	40	51	9	12	8	3	88.235	Arthropoda	Branchiopoda	Cladocera	Daphniidae	Ceriodaphnia	?	Choanoflagellida	Codonosigidae	?	Monosiga	Monosiga ovata	272	28
ASV643	96	0	122	0	0	0	536	2	0	88.235	Arthropoda	Branchiopoda	Cladocera	Daphniidae	Ceriodaphnia	Ascomycota	Saccharomycetes	Saccharomycetales	Dipodascaceae	Magnusiomyces	uncultured eukaryote	170	19
ASV946	4	4	18	0	0	0	316	16	19	88.235	Arthropoda	Branchiopoda	Cladocera	Daphniidae	Ceriodaphnia	Chytridiomycota	Chytridiomycetes	?	?	?	?	272	30
ASV2541	0	0	0	54	0	0	0	0	0	88.235	Arthropoda	Branchiopoda	Cladocera	Daphniidae	Ceriodaphnia	Cryptomycota	?	?	?	?	?	272	30
ASV104	3804	1418	5173	443	43	228	115	156	160	88.214	Arthropoda	Branchiopoda	Cladocera	Daphniidae	Ceriodaphnia	Ascomycota	Eurotiomycetes	Eurotiales	Trichocomaceae	Talaromyces	Talaromyces aerugineus	280	31
ASV2094	19	12	41	6	0	3	0	0	0	88.214	Arthropoda	Branchiopoda	Cladocera	Daphniidae	Ceriodaphnia	Ascomycota	Eurotiomycetes	Eurotiales	Trichocomaceae	Talaromyces	Talaromyces aerugineus	280	31
ASV2729	0	0	0	25	0	20	0	0	0	88.214	Arthropoda	Branchiopoda	Cladocera	Daphniidae	Ceriodaphnia	Ascomycota	Eurotiomycetes	Chaetothyriales	Trichomeriaceae	Knufia	Knufia petricola	280	30
ASV1666	8	15	19	17	3	0	47	9	6	88.214	Arthropoda	Branchiopoda	Cladocera	Daphniidae	Ceriodaphnia	Ascomycota	Eurotiomycetes	Chaetothyriales	Herpotrichiellaceae	Cladophialophora	Cladophialophora australiensis	280	30
ASV449	26	2	16	480	604	153	39	22	19	88.214	Arthropoda	Branchiopoda	Cladocera	Daphniidae	Ceriodaphnia	Chytridiomycota	Chytridiomycetes	Chytridiales	Chytriomycetaceae	Chytriomyces	?	280	29
ASV591	43	9	133	4	16	0	558	55	73	88.214	Arthropoda	Branchiopoda	Cladocera	Daphniidae	Ceriodaphnia	Chytridiomycota	Chytridiomycetes	?	?	?	?	280	31
ASV1309	7	0	4	98	73	12	0	0	0	88.214	Arthropoda	Branchiopoda	Cladocera	Daphniidae	Ceriodaphnia	Chytridiomycota	Chytridiomycetes	Chytridiales	Incertae Sedis	?	?	280	32
ASV2481	21	0	18	0	0	0	5	2	11	88.172	Arthropoda	Branchiopoda	Cladocera	Daphniidae	Ceriodaphnia	?	?	?	?	?	?	279	31
ASV272	130	103	185	127	99	64	605	640	1056	88.172	Arthropoda	Branchiopoda	Cladocera	Daphniidae	Ceriodaphnia	Chytridiomycota	Chytridiomycetes	?	?	?	?	279	31
ASV439	12	0	0	0	0	0	325	484	597	88.172	Arthropoda	Branchiopoda	Cladocera	Daphniidae	Ceriodaphnia	Chytridiomycota	Chytridiomycetes	?	?	?	?	279	31
ASV1474	1	0	0	2	0	150	0	0	0	88.136	Arthropoda	Branchiopoda	Cladocera	Daphniidae	Ceriodaphnia	Ciliophora	Intramacronucleata	Conthreep	Oligohymenophorea	Stokesia	?	177	20
ASV1486	1	9	0	58	8	27	9	16	22	88.07	Arthropoda	Branchiopoda	Cladocera	Daphniidae	Ceriodaphnia	Chytridiomycota	Chytridiomycetes	?	?	?	?	285	31
ASV2182	0	0	0	26	21	28	0	0	0	88.043	Arthropoda	Branchiopoda	Cladocera	Daphniidae	Ceriodaphnia	Chytridiomycota	Chytridiomycetes	?	?	?	?	276	31
ASV702	103	105	28	26	30	27	146	77	108	88	Arthropoda	Branchiopoda	Cladocera	Daphniidae	Ceriodaphnia	Chytridiomycota	Chytridiomycetes	Rhizophydiales	?	?	?	275	31
ASV85	4951	1847	9782	537	97	342	244	183	168	87.986	Arthropoda	Branchiopoda	Cladocera	Daphniidae	Ceriodaphnia	Ascomycota	Eurotiomycetes	Eurotiales	Trichocomaceae	Talaromyces	Talaromyces aerugineus	283	31
ASV1382	10	0	15	101	41	4	0	0	0	87.986	Arthropoda	Branchiopoda	Cladocera	Daphniidae	Ceriodaphnia	Chytridiomycota	Chytridiomycetes	?	?	?	?	283	33
ASV1570	2	91	43	0	0	0	0	0	0	87.956	Arthropoda	Branchiopoda	Cladocera	Daphniidae	Ceriodaphnia	?	?	?	?	?	?	274	29
ASV2419	0	7	39	0	0	14	0	0	0	87.956	Arthropoda	Branchiopoda	Cladocera	Daphniidae	Ceriodaphnia	?	?	?	?	?	?	274	29
ASV1938	0	0	0	0	0	0	83	4	7	87.956	Arthropoda	Branchiopoda	Cladocera	Daphniidae	Ceriodaphnia	Chytridiomycota	Chytridiomycetes	?	?	?	?	274	31
ASV2795	1	9	0	3	6	20	4	0	0	87.943	Arthropoda	Branchiopoda	Cladocera	Daphniidae	Ceriodaphnia	Chytridiomycota	Chytridiomycetes	?	?	?	?	282	32
ASV332	240	333	230	79	90	99	606	178	268	87.868	Arthropoda	Branchiopoda	Cladocera	Daphniidae	Ceriodaphnia	Chytridiomycota	Chytridiomycetes	Rhizophydiales	?	?	?	272	31
ASV629	76	117	45	29	44	33	257	64	126	87.868	Arthropoda	Branchiopoda	Cladocera	Daphniidae	Ceriodaphnia	Chytridiomycota	Chytridiomycetes	Rhizophydiales	?	?	?	272	30
ASV814	0	4	6	0	0	0	461	28	10	87.857	Arthropoda	Branchiopoda	Cladocera	Daphniidae	Ceriodaphnia	?	?	?	?	?	?	280	32
ASV2671	0	0	0	0	0	0	48	0	0	87.857	Arthropoda	Branchiopoda	Cladocera	Daphniidae	Ceriodaphnia	Chytridiomycota	Chytridiomycetes	?	?	?	?	280	32
ASV2229	0	0	4	24	44	0	0	0	0	87.857	Arthropoda	Branchiopoda	Cladocera	Daphniidae	Ceriodaphnia	Neocallimastigomycota	Neocallimastigomycetes	Neocallimastigales	Neocallimastigaceae	?	uncultured fungus	280	32
ASV1266	2	22	17	3	11	9	130	6	10	87.838	Arthropoda	Branchiopoda	Cladocera	Daphniidae	Ceriodaphnia	?	?	?	?	?	?	222	25
ASV1621	3	86	40	0	0	1	0	0	0	87.823	Arthropoda	Branchiopoda	Cladocera	Daphniidae	Ceriodaphnia	?	?	?	?	?	?	271	29
ASV537	3	33	58	4	0	0	791	63	87	87.814	Arthropoda	Branchiopoda	Cladocera	Daphniidae	Ceriodaphnia	Chytridiomycota	Chytridiomycetes	?	?	?	?	279	32
ASV1937	0	0	0	67	27	0	0	0	0	87.814	Arthropoda	Branchiopoda	Cladocera	Daphniidae	Ceriodaphnia	Chytridiomycota	Chytridiomycetes	?	?	?	?	279	32
ASV1002	17	15	6	26	127	0	103	18	23	87.793	Arthropoda	Branchiopoda	Cladocera	Daphniidae	Ceriodaphnia	?	?	?	?	?	?	213	23
ASV1595	2	8	0	37	3	45	6	15	16	87.719	Arthropoda	Branchiopoda	Cladocera	Daphniidae	Ceriodaphnia	Chytridiomycota	Chytridiomycetes	?	?	?	?	285	32
ASV2715	20	7	1	0	0	3	0	1	14	87.719	Arthropoda	Branchiopoda	Cladocera	Daphniidae	Ceriodaphnia	Chytridiomycota	Chytridiomycetes	Chytridiales	Chytriomycetaceae	?	?	285	31
ASV2798	0	0	0	8	0	35	0	0	0	87.719	Arthropoda	Branchiopoda	Cladocera	Daphniidae	Ceriodaphnia	Chytridiomycota	Monoblepharidomycetes	Monoblepharidales	?	?	?	285	33
ASV2519	0	0	55	0	0	0	0	0	0	87.681	Arthropoda	Branchiopoda	Cladocera	Daphniidae	Ceriodaphnia							138	17
ASV2722	4	5	0	37	0	0	0	0	0	87.676	Arthropoda	Branchiopoda	Cladocera	Daphniidae	Ceriodaphnia	Ascomycota	Eurotiomycetes	Chaetothyriales	Herpotrichiellaceae	Cladophialophora	Cladophialophora mycetomatis	284	32
ASV480	7	0	0	0	0	0	260	453	535	87.589	Arthropoda	Branchiopoda	Cladocera	Daphniidae	Ceriodaphnia	Chytridiomycota	Chytridiomycetes	?	?	?	?	282	33
ASV549	0	5	0	477	267	242	16	0	0	87.589	Arthropoda	Branchiopoda	Cladocera	Daphniidae	Ceriodaphnia	Chytridiomycota	Chytridiomycetes	?	?	?	?	282	33
ASV2864	5	4	0	3	7	18	1	1	1	87.589	Arthropoda	Branchiopoda	Cladocera	Daphniidae	Ceriodaphnia	Chytridiomycota	Chytridiomycetes	?	?	?	?	282	33
ASV2612	0	0	7	0	0	0	21	17	6	87.544	Arthropoda	Branchiopoda	Cladocera	Daphniidae	Ceriodaphnia	Chytridiomycota	Chytridiomycetes	?	?	?	?	281	34
ASV1308	59	30	30	12	22	4	31	1	5	87.5	Arthropoda	Branchiopoda	Cladocera	Daphniidae	Ceriodaphnia	?	?	?	?	?	?	152	19
ASV2696	0	0	0	0	0	0	41	1	5	87.5	Arthropoda	Branchiopoda	Cladocera	Daphniidae	Ceriodaphnia	Chytridiomycota	Monoblepharidomycetes	Monoblepharidales	?	?	?	280	33
ASV1035	77	41	154	0	0	0	1	10	29	87.455	Arthropoda	Branchiopoda	Cladocera	Daphniidae	Ceriodaphnia	?	?	?	?	?	?	279	33
ASV2081	0	0	0	33	12	37	0	0	0	87.455	Arthropoda	Branchiopoda	Cladocera	Daphniidae	Ceriodaphnia	Chytridiomycota	Chytridiomycetes	?	?	?	?	279	33
ASV2366	63	0	0	0	0	0	0	0	1	87.454	Arthropoda	Branchiopoda	Cladocera	Daphniidae	Ceriodaphnia	?	?	?	?	?	?	271	30
ASV309	163	41	647	1017	83	219	177	17	17	87.413	Arthropoda	Branchiopoda	Cladocera	Daphniidae	Ceriodaphnia	Ascomycota	Dothideomycetes	Pleosporales	Pleosporaceae	Curvularia	?	286	32
ASV2816	6	12	15	2	4	0	0	0	3	87.324	Arthropoda	Branchiopoda	Cladocera	Daphniidae	Ceriodaphnia	Chytridiomycota	Chytridiomycetes	?	?	?	?	284	34
ASV2095	0	5	11	2	3	60	0	0	0	87.234	Arthropoda	Branchiopoda	Cladocera	Daphniidae	Ceriodaphnia	Mucoromycota	Incertae Sedis	Endogonales	Endogonaceae	?	?	282	34
ASV2208	40	5	0	13	9	0	0	0	7	87.225	Arthropoda	Branchiopoda	Cladocera	Daphniidae	Ceriodaphnia	?	?	?	?	?	?	227	23
ASV1092	11	0	0	140	84	49	0	0	0	87.143	Arthropoda	Branchiopoda	Cladocera	Daphniidae	Ceriodaphnia	Chytridiomycota	Chytridiomycetes	?	?	?	?	280	32
ASV1735	55	0	0	6	0	0	21	11	21	87.143	Arthropoda	Branchiopoda	Cladocera	Daphniidae	Ceriodaphnia	Chytridiomycota	Monoblepharidomycetes	Monoblepharidales	Monoblepharidaceae	Monoblepharella	Monoblepharis macrandra	280	34
ASV1779	75	25	0	6	0	0	0	4	0	87.132	Arthropoda	Branchiopoda	Cladocera	Daphniidae	Ceriodaphnia	Chytridiomycota	Chytridiomycetes	Incertae Sedis	Synchytriaceae	?	?	272	31
ASV675	3	16	20	0	0	0	548	52	58	87.097	Arthropoda	Branchiopoda	Cladocera	Daphniidae	Ceriodaphnia	Chytridiomycota	Chytridiomycetes	?	?	?	?	279	34
ASV1220	21	0	157	2	9	13	16	7	5	87.063	Arthropoda	Branchiopoda	Cladocera	Daphniidae	Ceriodaphnia	Ascomycota	Lecanoromycetes	Ostropales	Graphidaceae	Gomphillus	Gomphillus americanus	286	27
ASV1051	50	0	18	0	0	0	231	3	0	87.059	Arthropoda	Branchiopoda	Cladocera	Daphniidae	Ceriodaphnia	Ascomycota	Saccharomycetes	Saccharomycetales	Dipodascaceae	Magnusiomyces	uncultured eukaryote	170	21
ASV2197	0	0	0	36	20	9	9	0	0	87.054	Arthropoda	Branchiopoda	Cladocera	Daphniidae	Ceriodaphnia	Protalveolata	Perkinsidae	A31	?	?	?	224	29
ASV50	0	0	9	4334	40849	2122	0	0	0	86.94	Arthropoda	Branchiopoda	Cladocera	Daphniidae	Ceriodaphnia	Ascomycota	?	?	?	?	?	268	29
ASV2265	0	0	0	40	29	0	0	0	0	86.926	Arthropoda	Branchiopoda	Cladocera	Daphniidae	Ceriodaphnia	Chytridiomycota	Chytridiomycetes	?	?	?	?	283	33
ASV2566	0	4	45	0	0	0	0	0	4	86.909	Arthropoda	Branchiopoda	Cladocera	Daphniidae	Ceriodaphnia	Cercozoa	Glissomonadida	?	?	?	?	275	27
ASV1141	93	33	123	0	0	0	0	3	11	86.879	Arthropoda	Branchiopoda	Cladocera	Daphniidae	Ceriodaphnia	Chytridiomycota	Chytridiomycetes	Incertae Sedis	Synchytriaceae	?	?	282	35
ASV2348	34	0	31	0	0	0	0	0	0	86.879	Arthropoda	Branchiopoda	Cladocera	Daphniidae	Ceriodaphnia	Chytridiomycota	Chytridiomycetes	?	?	?	?	282	35
ASV1698	29	33	56	0	0	0	0	1	0	86.861	Arthropoda	Branchiopoda	Cladocera	Daphniidae	Ceriodaphnia	Dinoflagellata	Dinophyceae	?	?	?	?	274	32
ASV325	1681	211	342	0	0	0	0	0	0	86.842	Arthropoda	Branchiopoda	Cladocera	Daphniidae	Ceriodaphnia	Cryptomycota	Incertae Sedis	Incertae Sedis	?	?	?	152	20
ASV1625	35	0	20	0	19	0	29	10	16	86.786	Arthropoda	Branchiopoda	Cladocera	Daphniidae	Ceriodaphnia	Chytridiomycota	Chytridiomycetes	Incertae Sedis	Synchytriaceae	?	?	280	33
ASV2460	0	0	0	37	18	2	1	0	0	86.784	Arthropoda	Branchiopoda	Cladocera	Daphniidae	Ceriodaphnia	Protalveolata	Perkinsidae	A31	?	?	?	227	30
ASV2106	8	0	4	0	0	0	65	2	1	86.765	Arthropoda	Branchiopoda	Cladocera	Daphniidae	Ceriodaphnia	Chytridiomycota	Chytridiomycetes	Rhizophydiales	Rhizophydiaceae	?	?	272	34
ASV2364	8	10	0	0	0	0	2	19	25	86.742	Arthropoda	Branchiopoda	Cladocera	Daphniidae	Ceriodaphnia	?	?	?	?	?	?	264	33
ASV155	767	1640	1901	8	19	0	395	823	1257	86.742	Arthropoda	Branchiopoda	Cladocera	Daphniidae	Ceriodaphnia	Cryptomycota	?	?	?	?	?	264	32
ASV253	368	816	826	9	11	0	184	539	537	86.742	Arthropoda	Branchiopoda	Cladocera	Daphniidae	Ceriodaphnia	Cryptomycota	?	?	?	?	?	264	32
ASV271	385	917	1494	4	0	0	34	77	112	86.742	Arthropoda	Branchiopoda	Cladocera	Daphniidae	Ceriodaphnia	Cryptomycota	?	?	?	?	uncultured fungus	264	32
ASV2310	2	10	2	9	18	22	1	1	2	86.742	Arthropoda	Branchiopoda	Cladocera	Daphniidae	Ceriodaphnia	Cryptomycota	?	?	?	?	?	264	32
ASV32	19806	10412	33387	0	0	0	0	0	0	86.667	Arthropoda	Branchiopoda	Cladocera	Daphniidae	Ceriodaphnia	Apicomplexa	Conoidasida	Gregarinasina	Eugregarinorida	?	?	150	20
ASV919	3	0	0	218	127	49	0	0	0	86.643	Arthropoda	Branchiopoda	Cladocera	Daphniidae	Ceriodaphnia	Chytridiomycota	Chytridiomycetes	Chytridiales	Incertae Sedis	?	?	277	33
ASV1353	20	0	110	6	6	16	17	1	5	86.572	Arthropoda	Branchiopoda	Cladocera	Daphniidae	Ceriodaphnia	Ascomycota	Lecanoromycetes	Ostropales	Graphidaceae	Gomphillus	?	283	34
ASV2557	48	5	0	0	0	0	0	0	0	86.572	Arthropoda	Branchiopoda	Cladocera	Daphniidae	Ceriodaphnia	Chytridiomycota	Chytridiomycetes	Incertae Sedis	Synchytriaceae	?	?	283	34
ASV2187	6	0	1	0	0	0	61	3	4	86.545	Arthropoda	Branchiopoda	Cladocera	Daphniidae	Ceriodaphnia	Chytridiomycota	Chytridiomycetes	Rhizophydiales	Rhizophydiaceae	Rhizophydium	?	275	35
ASV938	0	46	85	39	50	0	130	13	18	86.447	Arthropoda	Branchiopoda	Cladocera	Daphniidae	Ceriodaphnia	Ciliophora	Intramacronucleata	Conthreep	Nassophorea	?	?	273	30
ASV1680	0	0	0	0	31	0	89	0	2	86.447	Arthropoda	Branchiopoda	Cladocera	Daphniidae	Ceriodaphnia	Ciliophora	Intramacronucleata	Conthreep	Nassophorea	?	uncultured Microthoracida	273	30
ASV2163	0	0	77	0	0	0	0	0	0	86.301	Arthropoda	Branchiopoda	Cladocera	Daphniidae	Scapholeberis	Ascomycota	Dothideomycetes	Pleosporales	?	?	?	146	15
ASV2682	0	0	0	0	0	0	43	4	0	86.296	Arthropoda	Branchiopoda	Cladocera	Daphniidae	Ceriodaphnia	?	?	?	?	?	?	270	33
ASV1835	0	0	0	91	11	0	0	2	0	86.268	Arthropoda	Branchiopoda	Cladocera	Daphniidae	Ceriodaphnia	Chytridiomycota	Chytridiomycetes	Incertae Sedis	Synchytriaceae	?	?	284	35
ASV333	0	0	0	1921	140	46	0	0	0	86.232	Arthropoda	Branchiopoda	Cladocera	Daphniidae	Ceriodaphnia	Chytridiomycota	Chytridiomycetes	Rhizophydiales	Kappamycetaceae	?	?	276	36
ASV1636	121	1	6	0	0	0	0	0	0	86.184	Arthropoda	Branchiopoda	Cladocera	Daphniidae	Ceriodaphnia	Cryptomycota	Incertae Sedis	Incertae Sedis	?	?	?	152	21
ASV1843	0	0	10	7	4	25	57	0	0	86.182	Arthropoda	Branchiopoda	Cladocera	Daphniidae	Ceriodaphnia	Ciliophora	Intramacronucleata	Conthreep	Nassophorea	?	?	275	33
ASV506	29	42	173	76	302	149	234	72	62	86.161	Arthropoda	Branchiopoda	Cladocera	Daphniidae	Ceriodaphnia	Nucleariidae and Fonticula group	?	?	?	?	?	224	30
ASV1871	0	0	6	0	0	0	78	7	9	86.142	Arthropoda	Branchiopoda	Cladocera	Daphniidae	Ceriodaphnia	Cryptomycota	Incertae Sedis	Incertae Sedis	Incertae Sedis	Paramicrosporidium	?	267	34
ASV1482	24	54	66	4	0	0	0	0	3	86.131	Arthropoda	Branchiopoda	Cladocera	Daphniidae	Ceriodaphnia	Phragmoplastophyta	Embryophyta	?	?	?	?	137	17
ASV785	0	0	0	5	42	498	0	0	0	86.09	Arthropoda	Branchiopoda	Cladocera	Daphniidae	Ceriodaphnia	Ciliophora	Intramacronucleata	Conthreep	Prostomatea	Prorodon	?	266	31
ASV888	0	0	0	0	43	392	0	0	0	86.09	Arthropoda	Branchiopoda	Cladocera	Daphniidae	Ceriodaphnia	Ciliophora	Intramacronucleata	Conthreep	Prostomatea	Prorodon	?	266	31
ASV980	0	0	0	0	0	0	275	43	35	86.09	Arthropoda	Branchiopoda	Cladocera	Daphniidae	Ceriodaphnia	Ciliophora	Intramacronucleata	Conthreep	Prostomatea	Prorodon	metagenome	266	31
ASV601	308	164	190	0	0	0	0	82	131	86.056	Arthropoda	Branchiopoda	Cladocera	Daphniidae	Ceriodaphnia	Chytridiomycota	Chytridiomycetes	?	?	?	?	251	33
ASV1101	0	0	0	5	2	0	212	31	30	86.038	Arthropoda	Branchiopoda	Cladocera	Daphniidae	Ceriodaphnia	Ciliophora	Intramacronucleata	Conthreep	Prostomatea	Prorodon	?	265	31
ASV328	396	712	949	1	0	0	5	63	69	85.985	Arthropoda	Branchiopoda	Cladocera	Daphniidae	Ceriodaphnia	Cryptomycota	?	?	?	?	uncultured fungus	264	34
ASV1350	0	0	5	0	0	0	152	12	13	85.985	Arthropoda	Branchiopoda	Cladocera	Daphniidae	Ceriodaphnia	Cryptomycota	Incertae Sedis	Incertae Sedis	Incertae Sedis	Paramicrosporidium	?	264	34
ASV2344	6	0	23	0	0	0	14	5	17	85.921	Arthropoda	Branchiopoda	Cladocera	Daphniidae	Ceriodaphnia	Chytridiomycota	Chytridiomycetes	Rhizophydiales	Rhizophydiaceae	?	?	277	35
ASV2706	0	0	0	46	0	0	0	0	0	85.866	Arthropoda	Branchiopoda	Cladocera	Daphniidae	Ceriodaphnia	?	?	?	?	?	?	283	38
ASV2170	0	0	11	20	45	0	0	0	0	85.714	Arthropoda	Branchiopoda	Cladocera	Daphniidae	Ceriodaphnia	?	?	?	?	?	?	217	28
ASV921	20	6	108	0	0	0	51	84	126	85.714	Arthropoda	Branchiopoda	Cladocera	Daphniidae	Ceriodaphnia	Chytridiomycota	Chytridiomycetes	Rhizophydiales	Rhizophydiaceae	?	?	280	36
ASV1502	6	1	43	0	0	0	57	12	28	85.714	Arthropoda	Branchiopoda	Cladocera	Daphniidae	Ceriodaphnia	Chytridiomycota	Chytridiomycetes	Rhizophydiales	Kappamycetaceae	?	?	280	36
ASV131	55	0	27	2539	3186	2296	612	58	99	85.714	Arthropoda	Branchiopoda	Cladocera	Daphniidae	Ceriodaphnia	Ciliophora	Intramacronucleata	Conthreep	Prostomatea	Prorodon	?	266	32
ASV2052	0	0	81	0	0	3	0	0	0	85.714	Arthropoda	Branchiopoda	Cladocera	Daphniidae	Ceriodaphnia	Ciliophora	Intramacronucleata	Conthreep	Oligohymenophorea	?	?	266	30
ASV2313	0	5	0	23	15	24	0	0	0	85.66	Arthropoda	Branchiopoda	Cladocera	Daphniidae	Ceriodaphnia	Cryptomycota	?	?	?	?	?	265	34
ASV2786	0	2	0	8	12	20	0	0	2	85.66	Arthropoda	Branchiopoda	Cladocera	Daphniidae	Ceriodaphnia	Cryptomycota	?	?	?	?	?	265	34
ASV1166	0	0	0	0	0	0	196	32	26	85.606	Arthropoda	Branchiopoda	Cladocera	Daphniidae	Ceriodaphnia	Cryptomycota	Incertae Sedis	Incertae Sedis	Incertae Sedis	Paramicrosporidium	?	264	35
ASV315	15	0	7	937	963	369	0	0	0	85.502	Arthropoda	Branchiopoda	Cladocera	Daphniidae	Ceriodaphnia	Ciliophora	Intramacronucleata	Conthreep	Prostomatea	Prorodon	Prorodon teres	269	33
ASV2314	0	11	55	0	0	0	0	1	0	85.401	Arthropoda	Branchiopoda	Cladocera	Daphniidae	Ceriodaphnia	Protalveolata	Perkinsidae	A31	?	?	?	274	37
ASV2071	0	0	49	10	3	0	19	0	2	85.398	Arthropoda	Branchiopoda	Cladocera	Daphniidae	Ceriodaphnia	Phragmoplastophyta	Embryophyta	?	?	?	?	226	29
ASV1648	0	0	0	18	6	0	3	47	52	85.24	Arthropoda	Branchiopoda	Cladocera	Daphniidae	Ceriodaphnia	Ciliophora	Intramacronucleata	Conthreep	Prostomatea	Cryptocaryon	?	271	33
ASV2198	0	8	47	1	0	0	0	12	6	85.24	Arthropoda	Branchiopoda	Cladocera	Daphniidae	Ceriodaphnia	Ciliophora	Intramacronucleata	Conthreep	Prostomatea	Cryptocaryon	?	271	33
ASV1879	9	2	23	0	0	0	23	21	22	85.199	Arthropoda	Branchiopoda	Cladocera	Daphniidae	Ceriodaphnia	Chytridiomycota	Chytridiomycetes	Rhizophydiales	?	?	?	277	37
ASV517	0	0	0	341	144	340	279	5	4	85.185	Arthropoda	Branchiopoda	Cladocera	Daphniidae	Ceriodaphnia	Ciliophora	Intramacronucleata	Conthreep	Oligohymenophorea	?	?	270	33
ASV1887	0	0	0	64	9	23	2	1	0	85.161	Arthropoda	Branchiopoda	Cladocera	Daphniidae	Scapholeberis	Ascomycota	Saccharomycetes	Saccharomycetales	Trichomonascaceae	?	?	155	18
ASV1454	0	0	156	0	0	0	0	0	0	85.145	Arthropoda	Branchiopoda	Cladocera	Daphniidae	Ceriodaphnia	Ascomycota	Dothideomycetes	Pleosporales	?	?	?	276	37
ASV195	37	0	5	1714	2266	779	0	0	0	85.13	Arthropoda	Branchiopoda	Cladocera	Daphniidae	Ceriodaphnia	Ciliophora	Intramacronucleata	Conthreep	Prostomatea	Prorodon	Prorodon teres	269	34
ASV213	34	2186	1863	0	6	40	3	10	36	85.036	Arthropoda	Branchiopoda	Cladocera	Daphniidae	Ceriodaphnia	Dinoflagellata	Dinophyceae	Gymnodiniphycidae	Incertae Sedis	Akashiwo	Dinophyta sp.	274	38
ASV292	17	1264	1396	0	0	0	0	8	2	85.036	Arthropoda	Branchiopoda	Cladocera	Daphniidae	Ceriodaphnia	Dinoflagellata	Dinophyceae	Gymnodiniphycidae	Incertae Sedis	Akashiwo	Dinophyta sp.	274	38
ASV642	0	0	0	204	133	248	163	4	4	85.019	Arthropoda	Branchiopoda	Cladocera	Daphniidae	Ceriodaphnia	Ciliophora	Intramacronucleata	Conthreep	Oligohymenophorea	?	?	267	33
ASV902	63	0	0	60	4	12	34	118	121	85.019	Arthropoda	Branchiopoda	Cladocera	Daphniidae	Ceriodaphnia	Ciliophora	Intramacronucleata	Conthreep	Prostomatea	Cryptocaryon	?	267	35
ASV1747	0	0	0	4	41	66	2	0	0	85	Arthropoda	Branchiopoda	Cladocera	Daphniidae	Ceriodaphnia	Dinoflagellata	Dinophyceae	Gymnodiniphycidae	Incertae Sedis	Akashiwo	?	280	33
ASV2683	0	0	3	2	42	0	0	0	0	84.962	Arthropoda	Branchiopoda	Cladocera	Daphniidae	Ceriodaphnia	Ciliophora	Intramacronucleata	Conthreep	Prostomatea	?	?	266	36
ASV684	57	5	131	88	11	12	27	135	216	84.962	Arthropoda	Branchiopoda	Cladocera	Daphniidae	Ceriodaphnia	Ciliophora	Intramacronucleata	Conthreep	Prostomatea	Cryptocaryon	?	266	37
ASV951	85	13	80	0	0	0	14	72	110	84.871	Arthropoda	Branchiopoda	Cladocera	Daphniidae	Ceriodaphnia	Ciliophora	Intramacronucleata	Conthreep	Oligohymenophorea	?	?	271	34
ASV972	16	7	43	63	9	6	18	88	108	84.871	Arthropoda	Branchiopoda	Cladocera	Daphniidae	Ceriodaphnia	Ciliophora	Intramacronucleata	Conthreep	Prostomatea	Cryptocaryon	?	271	34
ASV1250	31	100	86	0	0	0	0	0	0	84.868	Arthropoda	Branchiopoda	Cladocera	Daphniidae	Ceriodaphnia	Cryptomycota	?	?	?	?	?	152	21
ASV2290	6	29	33	0	0	0	0	0	0	84.868	Arthropoda	Branchiopoda	Cladocera	Daphniidae	Ceriodaphnia	Cryptomycota	?	?	?	?	?	152	21
ASV393	14	1034	589	0	0	0	2	8	5	84.838	Arthropoda	Branchiopoda	Cladocera	Daphniidae	Ceriodaphnia	Dinoflagellata	Dinophyceae	Gymnodiniphycidae	Incertae Sedis	Akashiwo	Dinophyta sp.	277	39
ASV562	0	0	0	231	166	360	214	2	0	84.815	Arthropoda	Branchiopoda	Cladocera	Daphniidae	Ceriodaphnia	Ciliophora	Intramacronucleata	Conthreep	Oligohymenophorea	?	?	270	34
ASV163	0	0	0	4295	749	1342	0	0	0	84.701	Arthropoda	Branchiopoda	Cladocera	Daphniidae	Ceriodaphnia	Ciliophora	Intramacronucleata	Conthreep	?	?	?	268	33
ASV1379	31	6	35	0	4	0	15	36	45	84.672	Arthropoda	Branchiopoda	Cladocera	Daphniidae	Ceriodaphnia	Ciliophora	Intramacronucleata	Conthreep	Oligohymenophorea	?	?	274	35
ASV119	316	1455	6947	128	24	4	133	555	725	84.672	Arthropoda	Branchiopoda	Cladocera	Daphniidae	Ceriodaphnia	Dinoflagellata	Dinophyceae	Peridiniales	?	Peridinium	uncultured dinoflagellate	274	39
ASV208	156	710	2611	46	0	0	25	353	417	84.672	Arthropoda	Branchiopoda	Cladocera	Daphniidae	Ceriodaphnia	Dinoflagellata	Dinophyceae	Peridiniales	?	Peridinium	uncultured dinoflagellate	274	39
ASV303	129	455	1306	12	0	0	13	270	297	84.672	Arthropoda	Branchiopoda	Cladocera	Daphniidae	Ceriodaphnia	Dinoflagellata	Dinophyceae	Peridiniales	?	?	?	274	39
ASV1022	0	0	0	0	0	0	6	125	188	84.672	Arthropoda	Branchiopoda	Cladocera	Daphniidae	Ceriodaphnia	Dinoflagellata	Dinophyceae	?	?	?	?	274	39
ASV460	0	125	2	590	483	111	0	0	0	84.581	Arthropoda	Branchiopoda	Cladocera	Daphniidae	Ceriodaphnia	?	?	?	?	?	?	227	28
ASV735	0	51	0	310	220	28	0	0	0	84.581	Arthropoda	Branchiopoda	Cladocera	Daphniidae	Ceriodaphnia	Protalveolata	Perkinsidae	?	?	?	?	227	28
ASV2457	4	5	3	2	4	8	16	10	6	84.516	Arthropoda	Branchiopoda	Cladocera	Daphniidae	Ceriodaphnia	?	?	?	?	?	?	155	24
ASV1078	77	9	46	0	1	0	15	65	79	84.502	Arthropoda	Branchiopoda	Cladocera	Daphniidae	Ceriodaphnia	Ciliophora	Intramacronucleata	Conthreep	Oligohymenophorea	?	?	271	35
ASV2361	0	4	31	3	0	0	0	13	13	84.502	Arthropoda	Branchiopoda	Cladocera	Daphniidae	Ceriodaphnia	Ciliophora	Intramacronucleata	Conthreep	Prostomatea	Cryptocaryon	?	271	35
ASV847	58	14	36	95	34	17	61	64	87	84.47	Arthropoda	Branchiopoda	Cladocera	Daphniidae	Ceriodaphnia	Neocallimastigomycota	Neocallimastigomycetes	Neocallimastigales	?	?	?	264	39
ASV2398	13	6	35	0	0	0	5	1	2	84.444	Arthropoda	Branchiopoda	Cladocera	Daphniidae	Ceriodaphnia	?	?	?	?	?	?	270	39
ASV2246	0	0	0	0	10	35	26	0	0	84.387	Arthropoda	Branchiopoda	Cladocera	Daphniidae	Ceriodaphnia	Ciliophora	Intramacronucleata	Conthreep	Oligohymenophorea	?	?	269	36
ASV886	64	0	0	0	0	0	371	0	1	84.364	Arthropoda	Branchiopoda	Cladocera	Daphniidae	Ceriodaphnia	Protalveolata	Colpodellida	?	?	?	?	275	38
ASV123	3	32	147	2753	1185	2713	1306	598	869	84.307	Arthropoda	Branchiopoda	Cladocera	Daphniidae	Ceriodaphnia	?	?	?	?	?	?	274	40
ASV2476	0	0	0	57	0	0	0	0	0	84.307	Arthropoda	Branchiopoda	Cladocera	Daphniidae	Ceriodaphnia	Dinoflagellata	Dinophyceae	?	?	?	?	274	40
ASV2407	0	0	0	16	10	35	0	0	0	84.279	Arthropoda	Branchiopoda	Cladocera	Daphniidae	Ceriodaphnia	?	?	?	?	?	?	229	29
ASV2492	56	0	0	0	0	0	0	0	0	84.27	Arthropoda	Branchiopoda	Cladocera	Daphniidae	Ceriodaphnia	?	?	?	?	?	?	267	39
ASV1316	11	5	18	24	94	16	20	2	2	84.27	Arthropoda	Branchiopoda	Cladocera	Daphniidae	Ceriodaphnia	Apusomonadidae	?	?	?	?	?	267	33
ASV242	0	0	1	12	358	390	2678	65	48	84.27	Arthropoda	Branchiopoda	Cladocera	Daphniidae	Ceriodaphnia	Ciliophora	Intramacronucleata	Spirotrichea	Hypotrichia	Monocoronella	Monocoronella carnea	267	37
ASV800	0	0	532	0	0	0	0	0	0	84.211	Arthropoda	Branchiopoda	Cladocera	Daphniidae	Ceriodaphnia	Ciliophora	Intramacronucleata	Conthreep	Oligohymenophorea	Tetrahymena	?	266	36
ASV2055	13	46	25	0	0	0	0	0	0	84.211	Arthropoda	Branchiopoda	Cladocera	Daphniidae	Ceriodaphnia	Cryptomycota	?	?	?	?	?	152	22
ASV1460	22	0	0	0	0	0	132	0	1	84.173	Arthropoda	Branchiopoda	Cladocera	Daphniidae	Ceriodaphnia	Protalveolata	Colpodellida	?	?	?	?	278	39
ASV698	0	61	0	288	256	52	0	0	0	84.141	Arthropoda	Branchiopoda	Cladocera	Daphniidae	Ceriodaphnia	?	?	?	?	?	?	227	29
ASV101	4045	0	0	4767	211	3203	65	373	761	84.074	Arthropoda	Branchiopoda	Cladocera	Daphniidae	Ceriodaphnia	Ciliophora	Intramacronucleata	Conthreep	Oligohymenophorea	?	?	270	27
ASV1085	30	2	9	53	88	92	10	2	2	84.074	Arthropoda	Branchiopoda	Cladocera	Daphniidae	Ceriodaphnia	Ciliophora	Intramacronucleata	Spirotrichea	?	?	?	270	32
ASV988	0	0	20	111	154	39	20	1	0	84.043	Arthropoda	Branchiopoda	Cladocera	Daphniidae	Ceriodaphnia	?	?	?	?	?	?	282	42
ASV1647	26	19	56	0	0	0	0	16	9	84.015	Arthropoda	Branchiopoda	Cladocera	Daphniidae	Ceriodaphnia	?	?	?	?	?	?	269	36
ASV2475	19	1	7	0	3	0	12	6	9	84	Arthropoda	Branchiopoda	Cladocera	Daphniidae	Ceriodaphnia	?	?	?	?	?	?	275	39
ASV2658	2	3	30	8	0	0	4	0	1	83.983	Arthropoda	Branchiopoda	Cladocera	Daphniidae	Scapholeberis	Ascomycota	Dothideomycetes	Pleosporales	?	?	?	231	24
ASV1105	0	0	0	98	99	80	0	0	0	83.942	Arthropoda	Branchiopoda	Cladocera	Daphniidae	Ceriodaphnia	Ciliophora	Intramacronucleata	Conthreep	Oligohymenophorea	?	?	274	37
ASV926	13	69	270	0	0	0	0	17	22	83.942	Arthropoda	Branchiopoda	Cladocera	Daphniidae	Ceriodaphnia	Protalveolata	Colpodellida	?	?	?	?	274	39
ASV1772	8	4	37	0	0	0	0	26	36	83.913	Arthropoda	Branchiopoda	Cladocera	Daphniidae	Ceriodaphnia	Chytridiomycota	Chytridiomycetes	Gromochytriales	Gromochytriaceae	?	?	230	33
ASV1129	13	92	132	16	13	0	0	0	0	83.895	Arthropoda	Branchiopoda	Cladocera	Daphniidae	Ceriodaphnia	?	?	?	?	?	?	267	37
ASV1818	57	0	48	0	0	0	0	0	0	83.895	Arthropoda	Branchiopoda	Cladocera	Daphniidae	Ceriodaphnia	?	?	?	?	?	?	267	40
ASV2043	7	20	39	13	5	0	0	0	0	83.895	Arthropoda	Branchiopoda	Cladocera	Daphniidae	Ceriodaphnia	?	?	?	?	?	?	267	37
ASV2220	53	9	11	0	0	0	0	0	0	83.895	Arthropoda	Branchiopoda	Cladocera	Daphniidae	Ceriodaphnia	?	?	?	?	?	?	267	40
ASV2650	23	0	26	0	0	0	0	0	0	83.895	Arthropoda	Branchiopoda	Cladocera	Daphniidae	Ceriodaphnia	?	?	?	?	?	?	267	40
ASV1134	0	0	0	70	143	32	20	0	0	83.895	Arthropoda	Branchiopoda	Cladocera	Daphniidae	Ceriodaphnia	Apusomonadidae	?	?	?	?	?	267	34
ASV1498	0	0	0	42	87	16	3	0	0	83.895	Arthropoda	Branchiopoda	Cladocera	Daphniidae	Ceriodaphnia	Apusomonadidae	?	?	?	?	?	267	34
ASV2467	0	58	0	0	0	0	0	0	0	83.883	Arthropoda	Branchiopoda	Cladocera	Daphniidae	Ceriodaphnia	Chytridiomycota	Chytridiomycetes	Cladochytriales	Cladochytriaceae	Cladochytrium	?	273	38
ASV295	386	0	0	797	319	1116	0	0	0	83.835	Arthropoda	Branchiopoda	Cladocera	Daphniidae	Ceriodaphnia	Ciliophora	Intramacronucleata	Conthreep	Oligohymenophorea	Tetrahymena	Tetrahymena aff.	266	37
ASV348	48	14	0	382	545	852	82	38	34	83.835	Arthropoda	Branchiopoda	Cladocera	Daphniidae	Ceriodaphnia	Ciliophora	Intramacronucleata	Spirotrichea	Hypotrichia	?	?	266	38
ASV1206	7	0	0	5	2	0	83	50	89	83.835	Arthropoda	Branchiopoda	Cladocera	Daphniidae	Ceriodaphnia	Ciliophora	Intramacronucleata	Conthreep	Colpodea	Cyrtolophosis	uncultured alveolate	266	35
ASV2588	4	0	23	0	0	0	0	12	13	83.835	Arthropoda	Branchiopoda	Cladocera	Daphniidae	Ceriodaphnia	Ciliophora	Intramacronucleata	Conthreep	Oligohymenophorea	?	?	266	39
ASV2567	17	2	0	8	0	0	4	10	12	83.764	Arthropoda	Branchiopoda	Cladocera	Daphniidae	Ceriodaphnia	Ciliophora	Intramacronucleata	Conthreep	Colpodea	Bryometopus	uncultured Bryometopida	271	37
ASV2527	7	25	13	4	1	0	4	0	1	83.726	Arthropoda	Branchiopoda	Cladocera	Daphniidae	Ceriodaphnia	Ascomycota	Leotiomycetes	Helotiales	?	?	Hymenoscyphus sp.	467	59
ASV939	15	24	45	52	154	39	44	3	5	83.704	Arthropoda	Branchiopoda	Cladocera	Daphniidae	Ceriodaphnia	Apusomonadidae	?	?	?	?	?	270	34
ASV126	2988	0	0	3587	201	1926	20	194	390	83.704	Arthropoda	Branchiopoda	Cladocera	Daphniidae	Ceriodaphnia	Ciliophora	Intramacronucleata	Conthreep	Oligohymenophorea	?	?	270	28
ASV430	0	0	0	11	153	223	1013	31	24	83.704	Arthropoda	Branchiopoda	Cladocera	Daphniidae	Ceriodaphnia	Ciliophora	Intramacronucleata	Spirotrichea	Hypotrichia	Monocoronella	Monocoronella carnea	270	39
ASV860	8	0	0	0	16	0	51	136	244	83.704	Arthropoda	Branchiopoda	Cladocera	Daphniidae	Ceriodaphnia	Dinoflagellata	Dinophyceae	Gymnodiniphycidae	Suessiaceae	Symbiodinium	Piscinoodinium sp.	270	41
ASV1159	9	0	0	0	10	0	11	103	123	83.704	Arthropoda	Branchiopoda	Cladocera	Daphniidae	Ceriodaphnia	Dinoflagellata	Dinophyceae	Gymnodiniphycidae	Suessiaceae	Symbiodinium	Piscinoodinium sp.	270	41
ASV1021	0	0	12	79	180	33	14	1	0	83.688	Arthropoda	Branchiopoda	Cladocera	Daphniidae	Ceriodaphnia	Chytridiomycota	Chytridiomycetes	Rhizophydiales	?	?	?	282	43
ASV284	196	55	341	393	746	431	574	54	37	83.643	Arthropoda	Branchiopoda	Cladocera	Daphniidae	Ceriodaphnia	?	?	?	?	?	?	269	37
ASV588	61	11	50	89	247	149	281	9	7	83.643	Arthropoda	Branchiopoda	Cladocera	Daphniidae	Ceriodaphnia	?	?	?	?	?	?	269	37
ASV1155	5	0	83	0	0	0	13	78	79	83.643	Arthropoda	Branchiopoda	Cladocera	Daphniidae	Ceriodaphnia	Ciliophora	Intramacronucleata	Conthreep	Oligohymenophorea	?	?	269	40
ASV2076	0	0	38	0	0	0	0	14	30	83.643	Arthropoda	Branchiopoda	Cladocera	Daphniidae	Ceriodaphnia	Ciliophora	Intramacronucleata	Conthreep	Oligohymenophorea	?	?	269	40
ASV2452	4	0	28	0	0	0	0	11	15	83.643	Arthropoda	Branchiopoda	Cladocera	Daphniidae	Ceriodaphnia	Ciliophora	Intramacronucleata	Conthreep	Oligohymenophorea	?	?	269	40
ASV2158	19	27	12	9	3	0	4	3	0	83.617	Arthropoda	Branchiopoda	Cladocera	Daphniidae	Ceriodaphnia	Ascomycota	Leotiomycetes	Helotiales	?	?	Hymenoscyphus sp.	470	60
ASV1677	12	75	24	8	0	0	0	0	3	83.582	Arthropoda	Branchiopoda	Cladocera	Daphniidae	Ceriodaphnia	Ascomycota	Sordariomycetes	Xylariales	Xylariaceae	Xylaria	Xylaria acuta	469	61
ASV1713	0	0	5	21	37	53	1	0	0	83.582	Arthropoda	Branchiopoda	Cladocera	Daphniidae	Ceriodaphnia	Cryptomycota	?	?	?	?	?	268	33
ASV928	154	0	0	71	24	0	142	0	0	83.521	Arthropoda	Branchiopoda	Cladocera	Daphniidae	Ceriodaphnia	?	?	?	?	?	?	267	41
ASV1942	3	22	56	8	4	0	0	0	0	83.521	Arthropoda	Branchiopoda	Cladocera	Daphniidae	Ceriodaphnia	?	?	?	?	?	?	267	38
ASV230	94	23	62	733	935	1387	255	170	218	83.521	Arthropoda	Branchiopoda	Cladocera	Daphniidae	Ceriodaphnia	Ciliophora	Intramacronucleata	Spirotrichea	Hypotrichia	?	?	267	39
ASV352	0	0	0	3	223	216	1488	26	9	83.521	Arthropoda	Branchiopoda	Cladocera	Daphniidae	Ceriodaphnia	Ciliophora	Intramacronucleata	Spirotrichea	Hypotrichia	Monocoronella	Monocoronella carnea	267	39
ASV828	0	0	0	0	0	0	73	140	275	83.521	Arthropoda	Branchiopoda	Cladocera	Daphniidae	Ceriodaphnia	Cryptomycota	?	?	?	?	?	267	35
ASV2388	20	0	0	11	0	0	31	0	0	83.521	Arthropoda	Branchiopoda	Cladocera	Daphniidae	Ceriodaphnia	Cryptomycota	Incertae Sedis	Incertae Sedis	Incertae Sedis	?	?	267	39
ASV2150	35	36	7	0	0	0	0	0	0	83.521	Arthropoda	Branchiopoda	Cladocera	Daphniidae	Ceriodaphnia	Protalveolata	Perkinsidae	A31	?	?	?	267	41
ASV181	1158	807	2570	195	74	305	38	30	64	83.516	Arthropoda	Branchiopoda	Cladocera	Daphniidae	Ceriodaphnia	Ascomycota	Dothideomycetes	Pleosporales	?	?	?	455	58
ASV71	62	4248	19133	28	0	0	45	12	37	83.516	Arthropoda	Branchiopoda	Cladocera	Daphniidae	Ceriodaphnia	Dinoflagellata	Dinophyceae	Gymnodiniphycidae	Suessiaceae	Symbiodinium	?	273	42
ASV1286	9	0	0	0	17	0	16	62	99	83.516	Arthropoda	Branchiopoda	Cladocera	Daphniidae	Ceriodaphnia	Dinoflagellata	Dinophyceae	Gymnodiniphycidae	Suessiaceae	Symbiodinium	Piscinoodinium sp.	273	42
ASV111	1608	746	5932	802	300	935	212	61	146	83.512	Arthropoda	Branchiopoda	Cladocera	Daphniidae	Ceriodaphnia	Ascomycota	Dothideomycetes	Capnodiales	Cladosporiaceae	Cladosporium	Cladosporium herbarum	467	60
ASV209	892	231	2585	196	57	37	149	57	75	83.512	Arthropoda	Branchiopoda	Cladocera	Daphniidae	Ceriodaphnia	Ascomycota	Sordariomycetes	Xylariales	?	?	?	467	59
ASV86	2081	1980	10126	1165	408	996	683	171	196	83.476	Arthropoda	Branchiopoda	Cladocera	Daphniidae	Ceriodaphnia	Ascomycota	Sordariomycetes	Xylariales	?	?	?	466	59
ASV149	838	9	990	1546	767	3425	0	0	0	83.465	Arthropoda	Branchiopoda	Cladocera	Daphniidae	Ceriodaphnia	Ciliophora	Intramacronucleata	Conthreep	Oligohymenophorea	Tetrahymena	?	254	36
ASV456	22	0	8	233	132	196	257	175	315	83.459	Arthropoda	Branchiopoda	Cladocera	Daphniidae	Ceriodaphnia	Ciliophora	Intramacronucleata	Conthreep	Colpodea	Platyophrya	Platyophrya vorax	266	38
ASV2149	7	0	15	0	0	0	0	14	42	83.459	Arthropoda	Branchiopoda	Cladocera	Daphniidae	Ceriodaphnia	Ciliophora	Intramacronucleata	Conthreep	Oligohymenophorea	?	?	266	40
ASV773	47	1	24	112	185	117	65	3	2	83.456	Arthropoda	Branchiopoda	Cladocera	Daphniidae	Ceriodaphnia	?	?	?	?	?	?	272	38
ASV833	0	0	0	394	56	33	0	0	0	83.406	Arthropoda	Branchiopoda	Cladocera	Daphniidae	Ceriodaphnia	Zoopagomycota	Incertae Sedis	Harpellales	Legeriomycetaceae	Smittium	?	229	34
ASV335	145	31	397	38	22	6	59	592	808	83.396	Arthropoda	Branchiopoda	Cladocera	Daphniidae	Ceriodaphnia	Ciliophora	Intramacronucleata	Conthreep	Oligohymenophorea	Protocyclidium	metagenome	265	41
ASV258	3	0	211	0	1	0	428	1133	1409	83.395	Arthropoda	Branchiopoda	Cladocera	Daphniidae	Ceriodaphnia	Ciliophora	Intramacronucleata	Spirotrichea	Hypotrichia	?	?	271	38
ASV1865	7	61	25	5	0	0	3	0	0	83.369	Arthropoda	Branchiopoda	Cladocera	Daphniidae	Ceriodaphnia	Ascomycota	Sordariomycetes	Xylariales	Xylariaceae	Xylaria	Xylaria acuta	469	62
ASV434	55	94	221	549	134	381	2	5	3	83.333	Arthropoda	Branchiopoda	Cladocera	Daphniidae	Ceriodaphnia	Ascomycota	Leotiomycetes	Helotiales	Incertae Sedis	Phialocephala	Phialocephala sphaeroides	468	59
ASV171	0	0	0	4056	678	1098	0	0	0	83.333	Arthropoda	Branchiopoda	Cladocera	Daphniidae	Ceriodaphnia	Ciliophora	Intramacronucleata	Conthreep	?	?	?	270	39
ASV1230	0	0	0	0	0	0	55	45	126	83.333	Arthropoda	Branchiopoda	Cladocera	Daphniidae	Ceriodaphnia	Cryptomycota	?	?	?	?	?	270	36
ASV2904	0	0	0	0	0	0	0	14	25	83.333	Arthropoda	Branchiopoda	Cladocera	Daphniidae	Ceriodaphnia	Protalveolata	Perkinsidae	A31	?	?	?	270	36
ASV2370	0	11	9	0	0	28	11	3	1	83.298	Arthropoda	Branchiopoda	Cladocera	Daphniidae	Ceriodaphnia	Ascomycota	Sordariomycetes	Xylariales	?	Hyponectria	Hyponectria buxi	467	60
ASV2165	18	4	28	0	0	0	0	10	17	83.271	Arthropoda	Branchiopoda	Cladocera	Daphniidae	Ceriodaphnia	?	?	?	?	?	?	269	38
ASV1972	0	0	0	0	0	0	29	30	32	83.271	Arthropoda	Branchiopoda	Cladocera	Daphniidae	Ceriodaphnia	Ciliophora	Intramacronucleata	Conthreep	Colpodea	Cyrtolophosis	uncultured alveolate	269	37
ASV1032	0	0	314	0	1	0	0	0	0	83.271	Arthropoda	Branchiopoda	Cladocera	Daphniidae	Ceriodaphnia	Ciliophora	Intramacronucleata	Conthreep	Oligohymenophorea	Tetrahymena	?	269	39
ASV2216	6	0	43	0	0	0	4	7	13	83.214	Arthropoda	Branchiopoda	Cladocera	Daphniidae	Ceriodaphnia	Ascomycota	?	?	?	?	?	280	40
ASV2653	6	0	0	8	12	22	1	0	0	83.209	Arthropoda	Branchiopoda	Cladocera	Daphniidae	Ceriodaphnia	Cercozoa	Incertae Sedis	?	?	?	?	268	38
ASV1123	0	0	0	0	1	0	68	71	128	83.209	Arthropoda	Branchiopoda	Cladocera	Daphniidae	Ceriodaphnia	Ciliophora	Intramacronucleata	Spirotrichea	Hypotrichia	?	?	268	42
ASV98	3909	1498	4376	2211	404	1437	268	182	106	83.191	Arthropoda	Branchiopoda	Cladocera	Daphniidae	Ceriodaphnia	Ascomycota	Dothideomycetes	Capnodiales	Teratosphaeriaceae	Neocatenulostroma	Neocatenulostroma microsporum	470	60
ASV166	2594	0	0	2088	55	1110	13	169	299	83.15	Arthropoda	Branchiopoda	Cladocera	Daphniidae	Ceriodaphnia	Ciliophora	Intramacronucleata	Conthreep	Oligohymenophorea	?	?	273	30
ASV1654	0	0	0	23	82	15	5	0	0	83.146	Arthropoda	Branchiopoda	Cladocera	Daphniidae	Ceriodaphnia	Apusomonadidae	?	?	?	?	?	267	36
ASV384	47	14	0	423	399	721	51	36	27	83.146	Arthropoda	Branchiopoda	Cladocera	Daphniidae	Ceriodaphnia	Ciliophora	Intramacronucleata	Spirotrichea	Hypotrichia	?	?	267	40
ASV2089	0	0	81	0	0	0	0	0	0	83.146	Arthropoda	Branchiopoda	Cladocera	Daphniidae	Ceriodaphnia	Ciliophora	Intramacronucleata	Spirotrichea	Hypotrichia	?	Uroleptoides longiseries	267	40
ASV682	1	0	0	0	0	0	136	166	382	83.146	Arthropoda	Branchiopoda	Cladocera	Daphniidae	Ceriodaphnia	Cryptomycota	?	?	?	?	?	267	36
ASV58	4633	3473	16342	5384	1139	4125	1100	384	360	83.12	Arthropoda	Branchiopoda	Cladocera	Daphniidae	Ceriodaphnia	Ascomycota	Dothideomycetes	Capnodiales	Teratosphaeriaceae	Neocatenulostroma	Neocatenulostroma microsporum	468	60
ASV1902	0	0	0	39	26	23	0	5	5	83.083	Arthropoda	Branchiopoda	Cladocera	Daphniidae	Ceriodaphnia	Ciliophora	Intramacronucleata	Conthreep	Colpodea	?	?	266	37
ASV2669	5	31	7	0	5	0	0	0	0	83.083	Arthropoda	Branchiopoda	Cladocera	Daphniidae	Ceriodaphnia	Ciliophora	Intramacronucleata	Conthreep	Colpodea	?	Pseudocyrtolophosis alpestris	266	37
ASV169	1035	225	3994	238	70	31	238	78	48	83.077	Arthropoda	Branchiopoda	Cladocera	Daphniidae	Ceriodaphnia	Ascomycota	Sordariomycetes	Xylariales	?	?	?	455	59
ASV1514	0	5	14	39	15	73	0	0	0	83.047	Arthropoda	Branchiopoda	Cladocera	Daphniidae	Ceriodaphnia	Ascomycota	Dothideomycetes	Botryosphaeriales	Phyllostictaceae	Phyllosticta	?	466	63
ASV273	0	0	45	0	0	0	334	1374	1237	83.026	Arthropoda	Branchiopoda	Cladocera	Daphniidae	Ceriodaphnia	Ciliophora	Intramacronucleata	Spirotrichea	Hypotrichia	?	?	271	39
ASV511	30	49	0	0	0	0	48	397	601	83.019	Arthropoda	Branchiopoda	Cladocera	Daphniidae	Ceriodaphnia	Ciliophora	Intramacronucleata	Conthreep	Oligohymenophorea	Protocyclidium	?	265	42
ASV139	20	1974	6170	6	0	0	15	5	5	83.019	Arthropoda	Branchiopoda	Cladocera	Daphniidae	Ceriodaphnia	Dinoflagellata	Dinophyceae	Gymnodiniphycidae	Suessiaceae	Symbiodinium	?	265	42
ASV198	6	2505	453	0	0	0	107	661	1006	82.971	Arthropoda	Branchiopoda	Cladocera	Daphniidae	Ceriodaphnia	Dinoflagellata	Dinophyceae	Gymnodiniphycidae	Suessiaceae	Symbiodinium	?	276	38
ASV202	12	2352	595	0	0	0	88	504	1017	82.971	Arthropoda	Branchiopoda	Cladocera	Daphniidae	Ceriodaphnia	Dinoflagellata	Dinophyceae	Gymnodiniphycidae	Suessiaceae	Symbiodinium	?	276	38
ASV1018	4	0	0	0	0	0	58	97	161	82.963	Arthropoda	Branchiopoda	Cladocera	Daphniidae	Ceriodaphnia	Cryptomycota	?	?	?	?	?	270	37
ASV572	33	59	0	1	2	1	41	349	456	82.963	Arthropoda	Branchiopoda	Cladocera	Daphniidae	Ceriodaphnia	Dinoflagellata	Dinophyceae	Gymnodiniphycidae	Suessiaceae	?	?	270	41
ASV1034	18	0	0	0	8	0	38	98	151	82.963	Arthropoda	Branchiopoda	Cladocera	Daphniidae	Ceriodaphnia	Dinoflagellata	Dinophyceae	Gymnodiniphycidae	Suessiaceae	Symbiodinium	Piscinoodinium sp.	270	43
ASV240	205	173	986	912	105	1036	140	14	22	82.942	Arthropoda	Branchiopoda	Cladocera	Daphniidae	Ceriodaphnia	Ascomycota	Dothideomycetes	Capnodiales	Extremaceae	Vermiconia	Vermiconia foris	469	59
ASV293	357	351	464	2	3	0	246	527	709	82.917	Arthropoda	Branchiopoda	Cladocera	Daphniidae	Scapholeberis	Cryptomycota	?	?	?	?	?	240	28
ASV659	19	47	0	0	0	0	25	281	346	82.9	Arthropoda	Branchiopoda	Cladocera	Daphniidae	Ceriodaphnia	Ciliophora	Intramacronucleata	Conthreep	Oligohymenophorea	Protocyclidium	?	269	42
ASV2448	5	16	16	0	0	0	0	5	17	82.9	Arthropoda	Branchiopoda	Cladocera	Daphniidae	Ceriodaphnia	Ciliophora	Intramacronucleata	Spirotrichea	Oligotrichia	?	?	269	35
ASV2495	0	0	0	13	0	29	0	13	1	82.9	Arthropoda	Branchiopoda	Cladocera	Daphniidae	Ceriodaphnia	Ciliophora	Intramacronucleata	Conthreep	Oligohymenophorea	?	?	269	42
ASV510	19	29	64	534	112	355	8	5	1	82.895	Arthropoda	Branchiopoda	Cladocera	Daphniidae	Ceriodaphnia	Ascomycota	Leotiomycetes	Helotiales	Incertae Sedis	Phialocephala	Phialocephala sphaeroides	456	59
ASV287	535	226	860	423	48	184	322	72	87	82.869	Arthropoda	Branchiopoda	Cladocera	Daphniidae	Ceriodaphnia	Ascomycota	Dothideomycetes	Capnodiales	Mycosphaerellaceae	?	?	467	61
ASV1239	63	17	120	16	0	0	1	4	0	82.869	Arthropoda	Branchiopoda	Cladocera	Daphniidae	Ceriodaphnia	Ascomycota	Arthoniomycetes	?	?	?	Phaeococcomycetaceae sp.	467	62
ASV1443	31	16	103	3	0	0	0	5	1	82.869	Arthropoda	Branchiopoda	Cladocera	Daphniidae	Ceriodaphnia	Ascomycota	Arthoniomycetes	?	?	?	Phaeococcomycetaceae sp.	467	62
ASV77	3745	1769	9512	2606	571	2140	458	178	213	82.803	Arthropoda	Branchiopoda	Cladocera	Daphniidae	Ceriodaphnia	Ascomycota	Dothideomycetes	Capnodiales	Teratosphaeriaceae	Neocatenulostroma	Neocatenulostroma microsporum	471	62
ASV1864	38	0	0	9	4	0	50	0	0	82.772	Arthropoda	Branchiopoda	Cladocera	Daphniidae	Ceriodaphnia	?	?	?	?	?	?	267	43
ASV1036	0	0	0	153	131	28	0	0	0	82.731	Arthropoda	Branchiopoda	Cladocera	Daphniidae	Ceriodaphnia	?	Chlorophyceae	Chlamydomonadales	?	Chlorococcum	Chlorococcum vacuolatum	249	39
ASV2752	0	0	0	0	0	45	0	0	0	82.729	Arthropoda	Branchiopoda	Cladocera	Daphniidae	Ceriodaphnia	Ascomycota	?	?	?	?	?	469	65
ASV2501	5	22	15	0	0	0	0	4	10	82.721	Arthropoda	Branchiopoda	Cladocera	Daphniidae	Ceriodaphnia	Ciliophora	Intramacronucleata	Spirotrichea	Oligotrichia	?	?	272	36
ASV1520	0	0	0	60	33	43	0	2	5	82.707	Arthropoda	Branchiopoda	Cladocera	Daphniidae	Ceriodaphnia	Ciliophora	Intramacronucleata	Conthreep	Colpodea	?	?	266	38
ASV782	57	16	473	0	0	0	1	0	0	82.707	Arthropoda	Branchiopoda	Cladocera	Daphniidae	Ceriodaphnia	Cryptomycota	?	?	?	?	?	266	42
ASV893	99	99	138	47	4	25	13	2	1	82.692	Arthropoda	Branchiopoda	Cladocera	Daphniidae	Ceriodaphnia	Ascomycota	Eurotiomycetes	Eurotiales	Aspergillaceae	Aspergillus	uncultured fungus	468	62
ASV285	203	123	647	824	87	776	96	14	18	82.684	Arthropoda	Branchiopoda	Cladocera	Daphniidae	Ceriodaphnia	Ascomycota	Dothideomycetes	Capnodiales	Teratosphaeriaceae	Hortaea	Hortaea werneckii	462	57
ASV2160	1	19	31	0	0	0	4	11	11	82.671	Arthropoda	Branchiopoda	Cladocera	Daphniidae	Ceriodaphnia	?	?	?	?	?	?	277	41
ASV585	0	0	0	242	203	104	350	0	8	82.657	Arthropoda	Branchiopoda	Cladocera	Daphniidae	Ceriodaphnia	Ciliophora	Intramacronucleata	?	?	?	?	271	38
ASV443	0	0	10	1156	28	29	127	34	18	82.655	Arthropoda	Branchiopoda	Cladocera	Daphniidae	Ceriodaphnia	Ascomycota	Sordariomycetes	Xylariales	Apiosporaceae	Arthrinium	Arthrinium sacchari	467	63
ASV1086	13	21	220	15	5	9	0	1	1	82.655	Arthropoda	Branchiopoda	Cladocera	Daphniidae	Ceriodaphnia	Ascomycota	Arthoniomycetes	?	?	?	Phaeococcomycetaceae sp.	467	63
ASV1367	5	3	129	13	1	20	0	3	0	82.655	Arthropoda	Branchiopoda	Cladocera	Daphniidae	Ceriodaphnia	Ascomycota	Arthoniomycetes	?	?	?	Phaeococcomycetaceae sp.	467	63
ASV1462	104	0	0	7	27	0	0	6	10	82.655	Arthropoda	Branchiopoda	Cladocera	Daphniidae	Ceriodaphnia	Ascomycota	Sordariomycetes	Xylariales	Apiosporaceae	Arthrinium	?	467	63
ASV876	163	158	123	0	0	0	0	0	0	82.642	Arthropoda	Branchiopoda	Cladocera	Daphniidae	Ceriodaphnia	Cryptomycota	?	?	?	?	?	265	37
ASV1264	82	69	60	0	0	0	0	0	0	82.642	Arthropoda	Branchiopoda	Cladocera	Daphniidae	Ceriodaphnia	Cryptomycota	?	?	?	?	?	265	37
ASV100	27	2668	10852	3	0	0	35	4	4	82.642	Arthropoda	Branchiopoda	Cladocera	Daphniidae	Ceriodaphnia	Dinoflagellata	Dinophyceae	Gymnodiniphycidae	Suessiaceae	Symbiodinium	?	265	43
ASV2750	0	3	10	11	14	7	0	0	0	82.609	Arthropoda	Branchiopoda	Cladocera	Daphniidae	Ceriodaphnia	Ciliophora	Intramacronucleata	Spirotrichea	?	?	?	276	37
ASV1872	0	0	0	8	46	46	0	0	0	82.593	Arthropoda	Branchiopoda	Cladocera	Daphniidae	Ceriodaphnia	Cercozoa	Glissomonadida	?	?	?	?	270	40
ASV2121	0	0	0	0	0	0	10	34	35	82.593	Arthropoda	Branchiopoda	Cladocera	Daphniidae	Ceriodaphnia	Ciliophora	Intramacronucleata	Conthreep	Colpodea	Cyrtolophosis	?	270	38
ASV147	1179	716	2567	1345	160	530	721	150	241	82.59	Arthropoda	Branchiopoda	Cladocera	Daphniidae	Ceriodaphnia	Ascomycota	Dothideomycetes	Capnodiales	?	?	?	471	63
ASV1335	24	5	156	0	0	0	1	0	0	82.576	Arthropoda	Branchiopoda	Cladocera	Daphniidae	Ceriodaphnia	Cryptomycota	?	?	?	?	?	264	40
ASV12	19779	46567	30708	0	1	3	182	9997	16211	82.528	Arthropoda	Branchiopoda	Cladocera	Daphniidae	Ceriodaphnia	Ciliophora	Intramacronucleata	Spirotrichea	Oligotrichia	Spirostrombidium	?	269	36
ASV2057	0	0	0	33	14	27	0	1	9	82.528	Arthropoda	Branchiopoda	Cladocera	Daphniidae	Ceriodaphnia	Ciliophora	Intramacronucleata	Conthreep	Colpodea	?	?	269	39
ASV362	211	183	317	413	67	685	1	1	3	82.516	Arthropoda	Branchiopoda	Cladocera	Daphniidae	Ceriodaphnia	Ascomycota	Sordariomycetes	Hypocreales	Stachybotryaceae	Myrothecium	?	469	66
ASV607	86	145	119	169	72	262	0	2	0	82.403	Arthropoda	Branchiopoda	Cladocera	Daphniidae	Ceriodaphnia	Ascomycota	Sordariomycetes	Hypocreales	Stachybotryaceae	Myrothecium	?	466	66
ASV2181	0	0	0	0	0	0	0	30	46	82.353	Arthropoda	Branchiopoda	Cladocera	Daphniidae	Ceriodaphnia	Ciliophora	Intramacronucleata	Conthreep	Oligohymenophorea	?	?	272	37
ASV2446	24	7	25	0	0	1	1	0	1	82.34	Arthropoda	Branchiopoda	Cladocera	Daphniidae	Ceriodaphnia	Ascomycota	Arthoniomycetes	?	?	?	Phaeococcomycetaceae sp.	470	65
ASV1493	0	18	12	70	8	38	0	3	0	82.303	Arthropoda	Branchiopoda	Cladocera	Daphniidae	Ceriodaphnia	Ascomycota	Sordariomycetes	Hypocreales	Cordycipitaceae	?	?	469	67
ASV861	79	21	309	4	10	0	11	19	2	82.278	Arthropoda	Branchiopoda	Cladocera	Daphniidae	Scapholeberis	Ascomycota	?	?	?	?	?	237	30
ASV145	2949	884	3083	630	31	99	0	1	3	82.265	Arthropoda	Branchiopoda	Cladocera	Daphniidae	Ceriodaphnia	Ascomycota	Dothideomycetes	Botryosphaeriales	Botryosphaeriaceae	Diplodia	Diplodia mutila	468	64
ASV211	1970	392	1562	256	10	58	0	3	0	82.265	Arthropoda	Branchiopoda	Cladocera	Daphniidae	Ceriodaphnia	Ascomycota	Dothideomycetes	Botryosphaeriales	Botryosphaeriaceae	?	?	468	64
ASV364	775	192	320	24	0	0	245	138	178	82.227	Arthropoda	Branchiopoda	Cladocera	Daphniidae	Ceriodaphnia	Chytridiomycota	Chytridiomycetes	?	?	?	?	467	61
ASV535	308	98	384	23	91	0	27	40	79	82.222	Arthropoda	Branchiopoda	Cladocera	Daphniidae	Ceriodaphnia	?	?	?	?	?	?	270	42
ASV1824	42	0	0	19	5	0	39	0	0	82.222	Arthropoda	Branchiopoda	Cladocera	Daphniidae	Ceriodaphnia	?	?	?	?	?	?	270	45
ASV219	1143	312	374	439	103	387	521	320	500	82.203	Arthropoda	Branchiopoda	Cladocera	Daphniidae	Ceriodaphnia	Chytridiomycota	Chytridiomycetes	?	?	?	?	472	62
ASV306	490	218	541	407	83	223	268	84	95	82.198	Arthropoda	Branchiopoda	Cladocera	Daphniidae	Ceriodaphnia	Ascomycota	Dothideomycetes	Capnodiales	?	?	?	455	62
ASV949	3	8	39	106	26	171	5	11	5	82.189	Arthropoda	Branchiopoda	Cladocera	Daphniidae	Ceriodaphnia	Ascomycota	Sordariomycetes	Glomerellales	Glomerellaceae	Colletotrichum	Colletotrichum gloeosporioides	466	66
ASV2108	0	0	0	2	0	0	14	35	29	82.186	Arthropoda	Branchiopoda	Cladocera	Daphniidae	Ceriodaphnia	?	?	?	?	?	?	247	40
ASV301	346	162	888	453	67	491	21	38	77	82.151	Arthropoda	Branchiopoda	Cladocera	Daphniidae	Ceriodaphnia	Ascomycota	Eurotiomycetes	Eurotiales	Aspergillaceae	Penicillium	?	465	69
ASV444	113	79	338	286	32	461	6	38	35	82.151	Arthropoda	Branchiopoda	Cladocera	Daphniidae	Ceriodaphnia	Ascomycota	Eurotiomycetes	Eurotiales	Aspergillaceae	Aspergillus	?	465	69
ASV1019	34	4	282	0	0	0	0	0	0	82.129	Arthropoda	Branchiopoda	Cladocera	Daphniidae	Ceriodaphnia	Cryptomycota	?	?	?	?	?	263	43
ASV1882	36	0	0	10	0	0	23	7	23	82.105	Arthropoda	Branchiopoda	Cladocera	Daphniidae	Ceriodaphnia	Chytridiomycota	Monoblepharidomycetes	Monoblepharidales	Monoblepharidaceae	?	?	285	44
ASV2345	14	0	12	0	0	0	38	0	1	82.051	Arthropoda	Branchiopoda	Cladocera	Daphniidae	Ceriodaphnia	Ciliophora	Intramacronucleata	Conthreep	?	?	?	273	40
ASV1794	3	0	25	0	0	0	62	14	4	82.013	Arthropoda	Branchiopoda	Cladocera	Daphniidae	Ceriodaphnia	Ascomycota	Eurotiomycetes	Eurotiales	?	?	?	467	67
ASV536	5	2	27	412	0	596	0	3	4	81.974	Arthropoda	Branchiopoda	Cladocera	Daphniidae	Ceriodaphnia	Ascomycota	?	?	?	?	?	466	67
ASV2365	5	9	0	0	0	0	45	3	2	81.955	Arthropoda	Branchiopoda	Cladocera	Daphniidae	Ceriodaphnia	?	?	?	?	?	?	266	43
ASV1999	7	21	0	0	0	0	53	0	8	81.955	Arthropoda	Branchiopoda	Cladocera	Daphniidae	Ceriodaphnia	Protalveolata	Perkinsidae	?	?	?	?	266	43
ASV1363	0	0	0	50	17	106	0	2	0	81.935	Arthropoda	Branchiopoda	Cladocera	Daphniidae	Ceriodaphnia	Ascomycota	Sordariomycetes	Glomerellales	Glomerellaceae	Colletotrichum	Colletotrichum gloeosporioides	465	68
ASV1064	0	0	0	164	95	36	0	0	0	81.928	Arthropoda	Branchiopoda	Cladocera	Daphniidae	Ceriodaphnia	?	?	?	?	?	?	249	41
ASV2561	0	0	0	0	0	0	42	9	2	81.928	Arthropoda	Branchiopoda	Cladocera	Daphniidae	Ceriodaphnia	?	?	?	?	?	?	249	41
ASV595	144	290	133	0	0	0	4	124	190	81.928	Arthropoda	Branchiopoda	Cladocera	Daphniidae	Ceriodaphnia	Ciliophora	Intramacronucleata	Spirotrichea	Oligotrichia	Spirostrombidium	?	249	34
ASV2453	17	0	4	0	0	0	37	0	0	81.884	Arthropoda	Branchiopoda	Cladocera	Daphniidae	Ceriodaphnia	Ciliophora	Intramacronucleata	Conthreep	?	?	?	276	41
ASV2891	9	0	2	0	0	0	27	0	1	81.884	Arthropoda	Branchiopoda	Cladocera	Daphniidae	Ceriodaphnia	Ciliophora	Intramacronucleata	Conthreep	?	?	?	276	41
ASV1044	82	31	87	14	0	40	19	17	15	81.876	Arthropoda	Branchiopoda	Cladocera	Daphniidae	Ceriodaphnia	Ascomycota	Eurotiomycetes	Eurotiales	Aspergillaceae	Aspergillus	?	469	68
ASV709	51	46	86	170	18	233	21	7	5	81.857	Arthropoda	Branchiopoda	Cladocera	Daphniidae	Ceriodaphnia	Ascomycota	Eurotiomycetes	Eurotiales	?	?	?	463	70
ASV2821	0	9	33	0	0	0	0	0	0	81.818	Arthropoda	Branchiopoda	Cladocera	Daphniidae	Ceriodaphnia	?	?	?	?	?	?	154	24
ASV878	103	60	140	10	0	57	22	14	36	81.799	Arthropoda	Branchiopoda	Cladocera	Daphniidae	Ceriodaphnia	Ascomycota	Eurotiomycetes	Eurotiales	Aspergillaceae	Aspergillus	?	467	67
ASV2009	0	0	0	30	24	22	0	2	9	81.784	Arthropoda	Branchiopoda	Cladocera	Daphniidae	Ceriodaphnia	Ciliophora	Intramacronucleata	Conthreep	Colpodea	?	?	269	41
ASV2104	0	80	0	0	0	0	0	0	0	81.579	Arthropoda	Branchiopoda	Cladocera	Daphniidae	Ceriodaphnia	Ciliophora	Intramacronucleata	Spirotrichea	Euplotia	?	?	266	40
ASV1476	0	96	32	24	0	0	0	0	0	81.55	Arthropoda	Branchiopoda	Cladocera	Daphniidae	Ceriodaphnia	?	?	?	?	?	?	271	45
ASV518	2	0	16	435	0	657	0	1	0	81.545	Arthropoda	Branchiopoda	Cladocera	Daphniidae	Ceriodaphnia	Ascomycota	Eurotiomycetes	Eurotiales	?	?	?	466	70
ASV1207	0	0	0	153	54	29	0	0	0	81.495	Arthropoda	Branchiopoda	Cladocera	Daphniidae	Ceriodaphnia	Zoopagomycota	Incertae Sedis	Harpellales	?	?	?	281	45
ASV586	189	285	392	13	21	7	0	0	0	81.489	Arthropoda	Branchiopoda	Cladocera	Daphniidae	Ceriodaphnia	Ascomycota	Sordariomycetes	?	?	?	?	470	67
ASV598	4	59	43	66	59	61	73	185	329	81.481	Arthropoda	Branchiopoda	Cladocera	Daphniidae	Ceriodaphnia	?	?	?	?	?	?	270	41
ASV1769	0	9	51	5	11	16	4	3	12	81.481	Arthropoda	Branchiopoda	Cladocera	Daphniidae	Ceriodaphnia	?	?	?	?	?	?	270	41
ASV761	40	38	35	183	30	216	16	7	7	81.457	Arthropoda	Branchiopoda	Cladocera	Daphniidae	Ceriodaphnia	Ascomycota	Eurotiomycetes	Eurotiales	?	?	?	453	70
ASV445	4	0	0	402	271	705	4	0	0	81.448	Arthropoda	Branchiopoda	Cladocera	Daphniidae	Ceriodaphnia	Ciliophora	Intramacronucleata	Conthreep	Oligohymenophorea	Vorticella	?	221	36
ASV2783	2	3	8	0	0	0	1	4	26	81.343	Arthropoda	Branchiopoda	Cladocera	Daphniidae	Ceriodaphnia	?	?	?	?	?	?	268	43
ASV1437	0	0	0	63	15	79	0	3	0	81.306	Arthropoda	Branchiopoda	Cladocera	Daphniidae	Ceriodaphnia	Ascomycota	Sordariomycetes	Glomerellales	Glomerellaceae	Colletotrichum	Colletotrichum gloeosporioides	444	68
ASV1227	93	0	134	0	0	0	0	0	0	81.295	Arthropoda	Branchiopoda	Cladocera	Daphniidae	Ceriodaphnia	Apicomplexa	?	?	?	?	?	278	36
ASV994	0	28	8	0	0	8	38	89	170	81.273	Arthropoda	Branchiopoda	Cladocera	Daphniidae	Ceriodaphnia	?	?	?	?	?	?	267	41
ASV1693	2	4	9	14	30	28	24	0	9	81.273	Arthropoda	Branchiopoda	Cladocera	Daphniidae	Ceriodaphnia	?	?	?	?	?	?	267	41
ASV1956	0	0	5	21	49	16	1	0	0	81.273	Arthropoda	Branchiopoda	Cladocera	Daphniidae	Ceriodaphnia	?	?	?	?	?	?	267	41
ASV2543	16	0	36	0	0	0	0	2	0	81.273	Arthropoda	Branchiopoda	Cladocera	Daphniidae	Ceriodaphnia	?	?	?	?	?	?	267	39
ASV1054	21	24	158	14	28	0	24	5	26	81.203	Arthropoda	Branchiopoda	Cladocera	Daphniidae	Ceriodaphnia	?	?	?	?	?	?	266	43
ASV1292	23	10	101	7	17	0	15	11	15	81.203	Arthropoda	Branchiopoda	Cladocera	Daphniidae	Ceriodaphnia	?	?	?	?	?	?	266	43
ASV2060	5	8	27	0	3	0	29	6	6	81.203	Arthropoda	Branchiopoda	Cladocera	Daphniidae	Ceriodaphnia	?	?	?	?	?	?	266	43
ASV177	15	48	155	966	2812	1098	366	24	13	81.132	Arthropoda	Branchiopoda	Cladocera	Daphniidae	Ceriodaphnia	?	?	?	?	?	?	265	43
ASV563	0	2	2	196	466	287	14	0	6	81.132	Arthropoda	Branchiopoda	Cladocera	Daphniidae	Ceriodaphnia	?	?	?	?	?	?	265	43
ASV619	0	2	9	88	465	223	25	0	2	81.132	Arthropoda	Branchiopoda	Cladocera	Daphniidae	Ceriodaphnia	?	?	?	?	?	?	265	43
ASV803	0	0	5	57	257	182	25	1	2	81.132	Arthropoda	Branchiopoda	Cladocera	Daphniidae	Ceriodaphnia	?	?	?	?	?	?	265	43
ASV986	40	40	128	3	9	1	110	4	14	81.111	Arthropoda	Branchiopoda	Cladocera	Daphniidae	Ceriodaphnia	?	Choanoflagellida	Codonosigidae	?	?	?	270	43
ASV290	250	230	1112	116	206	89	380	94	259	81.041	Arthropoda	Branchiopoda	Cladocera	Daphniidae	Ceriodaphnia	?	?	?	?	?	?	269	44
ASV2002	52	0	36	0	0	0	0	0	0	81.041	Arthropoda	Branchiopoda	Cladocera	Daphniidae	Ceriodaphnia	Cryptomycota	?	?	?	?	?	269	42
ASV1328	0	0	2	29	97	44	15	1	0	80.97	Arthropoda	Branchiopoda	Cladocera	Daphniidae	Ceriodaphnia	?	?	?	?	?	?	268	44
ASV728	62	99	223	11	4	1	180	12	23	80.952	Arthropoda	Branchiopoda	Cladocera	Daphniidae	Ceriodaphnia	?	Choanoflagellida	Codonosigidae	?	?	?	273	44
ASV2391	23	0	39	0	0	0	0	0	0	80.935	Arthropoda	Branchiopoda	Cladocera	Daphniidae	Ceriodaphnia	?	?	?	?	?	?	278	37
ASV2574	26	0	26	0	0	0	0	0	0	80.935	Arthropoda	Branchiopoda	Cladocera	Daphniidae	Ceriodaphnia	Apicomplexa	?	?	?	?	?	278	37
ASV1542	1	0	6	35	38	35	14	5	6	80.899	Arthropoda	Branchiopoda	Cladocera	Daphniidae	Ceriodaphnia	?	?	?	?	?	?	267	42
ASV2214	60	0	13	0	0	0	0	0	0	80.899	Arthropoda	Branchiopoda	Cladocera	Daphniidae	Ceriodaphnia	Protalveolata	Perkinsidae	?	?	?	?	267	44
ASV638	415	97	45	13	0	0	61	60	72	80.87	Arthropoda	Branchiopoda	Cladocera	Daphniidae	Ceriodaphnia	Chytridiomycota	Chytridiomycetes	?	?	?	?	460	66
ASV1717	3	7	2	0	1	0	83	9	11	80.812	Arthropoda	Branchiopoda	Cladocera	Daphniidae	Ceriodaphnia	?	?	?	?	?	?	271	41
ASV2761	8	3	28	0	0	0	0	4	1	80.812	Arthropoda	Branchiopoda	Cladocera	Daphniidae	Ceriodaphnia	Cercozoa	Glissomonadida	?	?	?	?	271	43
ASV1960	12	5	11	0	13	0	5	10	36	80.769	Arthropoda	Branchiopoda	Cladocera	Daphniidae	Ceriodaphnia	Chytridiomycota	Monoblepharidomycetes	Monoblepharidales	Harpochytriaceae	Harpochytrium	?	468	69
ASV1855	3	2	0	6	69	2	20	0	0	80.755	Arthropoda	Branchiopoda	Cladocera	Daphniidae	Ceriodaphnia	?	?	?	?	?	?	265	44
ASV2199	0	2	0	3	33	36	0	0	0	80.755	Arthropoda	Branchiopoda	Cladocera	Daphniidae	Ceriodaphnia	?	?	?	?	?	?	265	44
ASV2386	6	3	4	0	0	0	3	21	25	80.755	Arthropoda	Branchiopoda	Cladocera	Daphniidae	Ceriodaphnia	?	?	?	?	?	?	265	44
ASV2404	32	8	11	0	0	0	4	5	1	80.755	Arthropoda	Branchiopoda	Cladocera	Daphniidae	Ceriodaphnia	Cryptomycota	Incertae Sedis	Incertae Sedis	?	?	?	265	46
ASV1128	25	46	87	2	4	1	80	7	14	80.741	Arthropoda	Branchiopoda	Cladocera	Daphniidae	Ceriodaphnia	?	Choanoflagellida	Codonosigidae	?	?	?	270	44
ASV2088	26	1	25	1	6	0	3	7	12	80.669	Arthropoda	Branchiopoda	Cladocera	Daphniidae	Ceriodaphnia	?	?	?	?	?	?	269	45
ASV2644	22	0	0	25	0	2	0	0	0	80.669	Arthropoda	Branchiopoda	Cladocera	Daphniidae	Ceriodaphnia	?	?	?	?	?	?	269	45
ASV711	12	590	31	0	0	0	0	0	1	80.657	Arthropoda	Branchiopoda	Cladocera	Daphniidae	Ceriodaphnia	?	?	?	?	?	?	274	45
ASV2630	0	31	7	12	0	0	0	0	0	80.657	Arthropoda	Branchiopoda	Cladocera	Daphniidae	Ceriodaphnia	?	?	?	?	?	?	274	48
ASV845	0	0	8	101	262	70	27	1	0	80.597	Arthropoda	Branchiopoda	Cladocera	Daphniidae	Ceriodaphnia	?	?	?	?	?	?	268	45
ASV2337	5	4	27	9	12	0	1	2	5	80.524	Arthropoda	Branchiopoda	Cladocera	Daphniidae	Ceriodaphnia	?	?	?	?	?	?	267	44
ASV616	0	0	0	833	0	0	0	0	0	80.515	Arthropoda	Branchiopoda	Cladocera	Daphniidae	Ceriodaphnia	Ciliophora	Postciliodesmatophora	Heterotrichea	?	?	?	272	47
ASV671	0	0	0	699	0	0	0	0	0	80.515	Arthropoda	Branchiopoda	Cladocera	Daphniidae	Ceriodaphnia	Ciliophora	Postciliodesmatophora	Heterotrichea	?	?	?	272	47
ASV2833	0	0	0	0	0	0	4	12	25	80.514	Arthropoda	Branchiopoda	Cladocera	Daphniidae	Ceriodaphnia	Ascomycota	Sordariomycetes	Phyllachorales	Phyllachoraceae	Phyllachora	Phyllachora graminis	467	73
ASV2479	0	50	0	0	0	0	5	2	0	80.451	Arthropoda	Branchiopoda	Cladocera	Daphniidae	Ceriodaphnia	Protalveolata	?	?	?	?	?	266	47
ASV617	4	790	30	0	0	0	0	0	0	80.443	Arthropoda	Branchiopoda	Cladocera	Daphniidae	Ceriodaphnia	?	?	?	?	?	?	271	45
ASV883	8	0	0	0	9	2	170	89	162	80.377	Arthropoda	Branchiopoda	Cladocera	Daphniidae	Ceriodaphnia	?	?	?	?	?	?	265	45
ASV1370	66	72	36	0	0	0	0	0	0	80.377	Arthropoda	Branchiopoda	Cladocera	Daphniidae	Ceriodaphnia	Cryptomycota	?	?	?	?	?	265	43
ASV300	870	7	111	0	0	0	93	569	895	80.303	Arthropoda	Branchiopoda	Cladocera	Daphniidae	Ceriodaphnia	Ciliophora	?	?	?	?	?	264	50
ASV778	264	0	21	0	0	0	8	128	131	80.303	Arthropoda	Branchiopoda	Cladocera	Daphniidae	Ceriodaphnia	Ciliophora	?	?	?	?	?	264	50
ASV1280	9	0	4	1	4	9	52	56	71	80.297	Arthropoda	Branchiopoda	Cladocera	Daphniidae	Ceriodaphnia	Ciliophora	Intramacronucleata	Conthreep	Oligohymenophorea	Vorticella	uncultured microeukaryote	269	46
ASV2757	0	25	10	9	0	0	0	0	0	80.292	Arthropoda	Branchiopoda	Cladocera	Daphniidae	Ceriodaphnia	Dinoflagellata	Dinophyceae	?	?	?	?	274	49
ASV1216	0	0	0	0	0	0	58	79	94	80.224	Arthropoda	Branchiopoda	Cladocera	Daphniidae	Ceriodaphnia	?	?	?	?	?	?	268	46
ASV1432	1	5	0	26	90	7	32	0	0	80.224	Arthropoda	Branchiopoda	Cladocera	Daphniidae	Ceriodaphnia	?	?	?	?	?	?	268	46
ASV1554	2	4	3	0	4	0	111	2	11	80.224	Arthropoda	Branchiopoda	Cladocera	Daphniidae	Ceriodaphnia	?	?	?	?	?	?	268	42
ASV701	7	611	31	0	0	0	0	0	2	80.22	Arthropoda	Branchiopoda	Cladocera	Daphniidae	Ceriodaphnia	?	?	?	?	?	?	273	47
ASV551	402	2	32	0	0	0	26	229	308	80.15	Arthropoda	Branchiopoda	Cladocera	Daphniidae	Ceriodaphnia	Ciliophora	?	?	?	?	?	267	51
ASV2657	0	32	16	0	0	0	0	0	0	80.074	Arthropoda	Branchiopoda	Cladocera	Daphniidae	Ceriodaphnia	?	?	?	?	?	?	271	53
ASV1303	2	0	1	34	112	27	15	5	0	80	Arthropoda	Branchiopoda	Cladocera	Daphniidae	Ceriodaphnia	?	?	?	?	?	?	265	46
ASV2546	0	0	0	0	0	54	0	0	0	80	Arthropoda	Branchiopoda	Cladocera	Daphniidae	Ceriodaphnia	?	Choanoflagellida	Codonosigidae	?	?	?	270	46
ASV2724	45	0	0	0	0	0	0	0	0	80	Arthropoda	Branchiopoda	Cladocera	Daphniidae	Ceriodaphnia	Ciliophora	Intramacronucleata	Spirotrichea	?	?	?	270	43
ASV323	0	1	0	1791	278	178	0	0	0	79.926	Arthropoda	Branchiopoda	Cladocera	Daphniidae	Ceriodaphnia	Apicomplexa	Conoidasida	Gregarinasina	Neogregarinorida	?	?	269	47
ASV117	140	92	5909	867	632	1845	866	4	3	79.926	Arthropoda	Branchiopoda	Cladocera	Daphniidae	Ceriodaphnia	Ciliophora	Intramacronucleata	Conthreep	Oligohymenophorea	Ophrydium	Ophrydium versatile	269	47
ASV1550	7	28	41	0	0	0	60	1	1	79.926	Arthropoda	Branchiopoda	Cladocera	Daphniidae	Ceriodaphnia	Protalveolata	?	?	?	?	?	269	43
ASV397	1351	75	202	0	0	0	0	0	0	79.924	Arthropoda	Branchiopoda	Cladocera	Daphniidae	Ceriodaphnia	Cryptomycota	?	?	?	?	?	264	48
ASV587	3	857	47	0	0	0	0	0	0	79.705	Arthropoda	Branchiopoda	Cladocera	Daphniidae	Ceriodaphnia	?	?	?	?	?	?	271	47
ASV846	126	0	8	14	97	106	28	43	45	79.661	Arthropoda	Branchiopoda	Cladocera	Daphniidae	Ceriodaphnia	Chytridiomycota	Monoblepharidomycetes	Monoblepharidales	Gonapodyaceae	Gonapodya	Gonapodya polymorpha	472	68
ASV2819	0	0	0	0	0	42	0	0	0	79.63	Arthropoda	Branchiopoda	Cladocera	Daphniidae	Ceriodaphnia	?	?	?	?	?	?	270	47
ASV1151	38	0	11	14	39	66	27	20	44	79.579	Arthropoda	Branchiopoda	Cladocera	Daphniidae	Ceriodaphnia	Chytridiomycota	Monoblepharidomycetes	Monoblepharidales	Gonapodyaceae	Gonapodya	Gonapodya polymorpha	475	69
ASV461	7	0	0	369	283	652	0	0	0	79.554	Arthropoda	Branchiopoda	Cladocera	Daphniidae	Ceriodaphnia	Ciliophora	Intramacronucleata	Conthreep	Oligohymenophorea	Vorticella	Vorticella convallaria	269	48
ASV1080	71	3	8	0	0	0	15	93	101	79.545	Arthropoda	Branchiopoda	Cladocera	Daphniidae	Ceriodaphnia	Ciliophora	?	?	?	?	?	264	52
ASV1215	151	38	42	0	0	0	0	0	0	79.545	Arthropoda	Branchiopoda	Cladocera	Daphniidae	Ceriodaphnia	Cryptomycota	?	?	?	?	?	264	49
ASV962	12	92	139	0	1	0	113	0	5	79.478	Arthropoda	Branchiopoda	Cladocera	Daphniidae	Ceriodaphnia	?	?	?	?	?	?	268	43
ASV1812	43	52	10	0	0	0	1	0	0	79.362	Arthropoda	Branchiopoda	Cladocera	Daphniidae	Ceriodaphnia	Basidiomycota	Agaricomycetes	Trechisporales	Hydnodontaceae	Trechispora	Trechispora alnicola	470	79
ASV1028	280	8	23	0	0	0	4	0	1	79.245	Arthropoda	Branchiopoda	Cladocera	Daphniidae	Ceriodaphnia	Cryptomycota	?	?	?	?	?	265	48
ASV1162	218	13	25	0	0	0	0	0	0	79.245	Arthropoda	Branchiopoda	Cladocera	Daphniidae	Ceriodaphnia	Cryptomycota	?	?	?	?	?	265	48
ASV867	61	0	9	24	84	148	41	35	49	79.237	Arthropoda	Branchiopoda	Cladocera	Daphniidae	Ceriodaphnia	Chytridiomycota	Monoblepharidomycetes	Monoblepharidales	Gonapodyaceae	Gonapodya	Gonapodya polymorpha	472	70
ASV953	326	19	26	0	0	0	0	2	0	79.167	Arthropoda	Branchiopoda	Cladocera	Daphniidae	Ceriodaphnia	Cryptomycota	?	?	?	?	?	264	50
ASV1076	244	5	33	0	0	0	1	4	5	79.167	Arthropoda	Branchiopoda	Cladocera	Daphniidae	Ceriodaphnia	Cryptomycota	?	?	?	?	?	264	50
ASV1149	226	8	2	0	0	0	0	19	5	79.167	Arthropoda	Branchiopoda	Cladocera	Daphniidae	Ceriodaphnia	Cryptomycota	?	?	?	?	?	264	50
ASV1192	179	13	50	0	0	0	0	0	0	79.167	Arthropoda	Branchiopoda	Cladocera	Daphniidae	Ceriodaphnia	Cryptomycota	?	?	?	?	?	264	50
ASV918	87	0	16	8	80	93	26	29	59	79.158	Arthropoda	Branchiopoda	Cladocera	Daphniidae	Ceriodaphnia	Chytridiomycota	Monoblepharidomycetes	Monoblepharidales	Gonapodyaceae	Gonapodya	Gonapodya polymorpha	475	71
ASV170	4620	335	726	0	0	0	14	72	119	79.026	Arthropoda	Branchiopoda	Cladocera	Daphniidae	Ceriodaphnia	Cryptomycota	?	?	?	?	?	267	51
ASV1168	220	10	22	0	0	0	0	0	0	79.026	Arthropoda	Branchiopoda	Cladocera	Daphniidae	Ceriodaphnia	Cryptomycota	?	?	?	?	?	267	51
ASV2376	6	1	36	4	0	1	14	0	1	78.947	Arthropoda	Branchiopoda	Cladocera	Daphniidae	Ceriodaphnia	Ascomycota	Dothideomycetes	Pleosporales	Didymosphaeriaceae	?	?	361	57
ASV1045	260	10	15	0	0	0	0	7	13	78.788	Arthropoda	Branchiopoda	Cladocera	Daphniidae	Ceriodaphnia	Cryptomycota	?	?	?	?	?	264	51
ASV768	457	27	41	0	0	0	0	13	23	78.788	Arthropoda	Branchiopoda	Cladocera	Daphniidae	Ceriodaphnia	Cryptomycota	?	?	?	?	?	264	51
ASV1944	11	13	9	5	7	15	18	5	10	78.571	Arthropoda	Branchiopoda	Cladocera	Daphniidae	Ceriodaphnia	?	?	?	?	?	?	266	47
ASV787	474	25	37	0	0	0	0	1	7	78.409	Arthropoda	Branchiopoda	Cladocera	Daphniidae	Ceriodaphnia	Cryptomycota	?	?	?	?	?	264	52
ASV509	937	34	144	0	0	0	0	4	11	78.277	Arthropoda	Branchiopoda	Cladocera	Daphniidae	Ceriodaphnia	Cryptomycota	?	?	?	?	?	267	53
ASV2276	7	16	4	4	4	8	18	3	5	78.195	Arthropoda	Branchiopoda	Cladocera	Daphniidae	Ceriodaphnia	?	?	?	?	?	?	266	48
ASV2303	8	7	10	2	2	6	16	10	6	78.067	Arthropoda	Branchiopoda	Cladocera	Daphniidae	Ceriodaphnia	?	?	?	?	?	?	269	48
ASV942	1	0	0	57	279	20	0	8	15	77.372	Arthropoda	Branchiopoda	Cladocera	Daphniidae	Daphnia	Cercozoa	Thecofilosea	Incertae Sedis	?	?	?	274	48
ASV575	20	78	559	0	0	0	6	121	145	76.606	Arthropoda	Branchiopoda	Cladocera	Daphniidae	Ceriodaphnia	Cercozoa	Vampyrellidae	?	?	?	?	218	44
ASV1174	187	20	43	0	0	0	0	0	0	86.861	Arthropoda	Branchiopoda	Cladocera	Eurycercidae	Eurycercus	Cryptomycota	?	?	?	?	?	274	23
ASV2817	9	6	27	0	0	0	0	0	0	96.377	Arthropoda	Branchiopoda	Cladocera	Macrotrichidae	Neothrix	Arthropoda	Branchiopoda	Diplostraca	?	?	?	276	7
ASV2227	0	3	67	0	0	0	0	0	2	96.078	Arthropoda	Branchiopoda	Cladocera	Macrotrichidae	Macrothrix							102	3
ASV504	0	0	0	0	0	0	276	331	534	95.706	Arthropoda	Branchiopoda	Cladocera	Macrotrichidae	Acantholeberis	Arthropoda	Branchiopoda	Diplostraca	?	?	?	163	7
ASV2086	0	0	0	0	0	0	72	3	7	95.706	Arthropoda	Branchiopoda	Cladocera	Macrotrichidae	Acantholeberis	Arthropoda	?	?	?	?	?	163	7
ASV2714	0	0	0	0	0	0	26	10	10	95.706	Arthropoda	Branchiopoda	Cladocera	Macrotrichidae	Acantholeberis	Arthropoda	Branchiopoda	Diplostraca	?	?	?	163	7
ASV369	0	0	0	0	0	0	159	573	1077	95.652	Arthropoda	Branchiopoda	Cladocera	Macrotrichidae	Acantholeberis	Arthropoda	Branchiopoda	Diplostraca	?	?	?	161	7
ASV1010	0	32	295	0	0	0	0	0	3	85.766	Arthropoda	Branchiopoda	Cladocera	Macrotrichidae	Macrothrix	Apicomplexa	?	?	?	?	?	274	31
ASV162	111	11	32	7	3	0	0	3248	3056	95.455	Arthropoda	Branchiopoda	Cladocera	Nototrichidae	Notothrix	Arthropoda	?	?	?	?	?	154	7
ASV1565	39	12	18	0	0	0	0	51	16	95.327	Arthropoda	Branchiopoda	Cladocera	Nototrichidae	Notothrix	Arthropoda	Branchiopoda	Diplostraca	?	?	?	107	3
ASV235	172	15	53	5	0	0	0	1837	1647	95.283	Arthropoda	Branchiopoda	Cladocera	Nototrichidae	Notothrix							106	3
ASV217	41	6	7	3	0	0	1	2093	1968	95.192	Arthropoda	Branchiopoda	Cladocera	Nototrichidae	Notothrix							104	3
ASV148	69	10	7	7	1	0	0	4035	3458	94.898	Arthropoda	Branchiopoda	Cladocera	Nototrichidae	Notothrix							98	3
ASV1202	131	46	61	0	0	0	0	0	0	94.872	Arthropoda	Branchiopoda	Cladocera	Nototrichidae	Notothrix	Arthropoda	?	?	?	?	?	156	8
ASV136	150	40	59	11	3	0	0	3821	4468	94.805	Arthropoda	Branchiopoda	Cladocera	Nototrichidae	Notothrix	Arthropoda	?	?	?	?	?	154	8
ASV152	130	35	41	5	1	0	2	3481	3443	94.805	Arthropoda	Branchiopoda	Cladocera	Nototrichidae	Notothrix	Arthropoda	?	?	?	?	?	154	8
ASV243	105	10	19	2	0	0	0	1796	1604	94.737	Arthropoda	Branchiopoda	Cladocera	Nototrichidae	Notothrix							95	3
ASV2692	1	0	0	0	0	0	0	24	22	94.156	Arthropoda	Branchiopoda	Cladocera	Nototrichidae	Notothrix	Arthropoda	?	?	?	?	?	154	9
ASV1884	1	0	2	0	0	0	0	30	66	93.506	Arthropoda	Branchiopoda	Cladocera	Nototrichidae	Notothrix							77	5
ASV1577	8	0	3	11	29	55	27	1	1	95.294	Arthropoda	Branchiopoda	Cladocera	Podonidae	Cornigerius	Cercozoa	Novel Clade 12	?	?	?	?	85	4
ASV1388	8	0	3	9	36	84	18	7	5	94.845	Arthropoda	Branchiopoda	Cladocera	Podonidae	Cornigerius	Cercozoa	Novel Clade 12	?	?	?	?	97	5
ASV1869	0	0	0	0	0	0	61	6	34	87.342	Arthropoda	Hexanauplia	Calanoida	Acartiidae	Acartia	?	?	?	?	?	?	158	17
ASV2515	0	0	0	0	0	0	23	13	19	87.179	Arthropoda	Hexanauplia	Calanoida	Acartiidae	Acartia	?	?	?	?	?	?	156	17
ASV270	0	0	0	942	1759	335	0	0	0	86.624	Arthropoda	Hexanauplia	Calanoida	Acartiidae	Acartia	?	?	?	?	?	?	157	20
ASV232	0	0	0	1057	2046	690	0	0	0	86.538	Arthropoda	Hexanauplia	Calanoida	Acartiidae	Acartia	?	?	?	?	?	?	156	20
ASV2444	4	0	12	0	0	0	43	0	0	82.39	Arthropoda	Hexanauplia	Calanoida	Acartiidae	Acartia	Arthropoda	Insecta	?	?	?	?	159	24
ASV2646	0	0	0	0	0	49	0	0	0	81.919	Arthropoda	Hexanauplia	Calanoida	Acartiidae	Acartia	LKM15	?	?	?	?	?	271	41
ASV1903	6	0	6	0	1	0	79	1	4	81.529	Arthropoda	Hexanauplia	Calanoida	Acartiidae	Acartia	?	?	?	?	?	?	157	25
ASV1161	26	74	40	0	0	0	0	52	64	81.387	Arthropoda	Hexanauplia	Calanoida	Acartiidae	Acartia	Cryptomycota	Incertae Sedis	Incertae Sedis	Incertae Sedis	?	?	274	36
ASV2843	0	0	0	0	0	0	39	2	0	81.319	Arthropoda	Hexanauplia	Calanoida	Acartiidae	Acartia	Cryptomycota	Incertae Sedis	Incertae Sedis	Incertae Sedis	?	?	273	38
ASV1358	0	0	0	0	0	0	169	9	0	80.952	Arthropoda	Hexanauplia	Calanoida	Acartiidae	Acartia	Cryptomycota	Incertae Sedis	Incertae Sedis	Incertae Sedis	?	?	273	39
ASV961	59	145	81	0	0	0	0	18	60	80.882	Arthropoda	Hexanauplia	Calanoida	Acartiidae	Acartia	Cryptomycota	Incertae Sedis	Incertae Sedis	?	?	?	272	37
ASV1156	39	107	15	0	0	0	0	22	74	80.882	Arthropoda	Hexanauplia	Calanoida	Acartiidae	Acartia	Cryptomycota	Incertae Sedis	Incertae Sedis	Incertae Sedis	?	?	272	37
ASV2659	28	0	18	0	0	0	0	2	0	80.657	Arthropoda	Hexanauplia	Calanoida	Acartiidae	Acartia	Cryptomycota	Incertae Sedis	Incertae Sedis	Incertae Sedis	?	?	274	38
ASV2759	0	0	0	0	0	0	44	0	0	80.586	Arthropoda	Hexanauplia	Calanoida	Acartiidae	Acartia	Cryptomycota	Incertae Sedis	Incertae Sedis	Incertae Sedis	?	?	273	40
ASV1543	24	5	44	0	0	0	4	33	29	80.074	Arthropoda	Hexanauplia	Calanoida	Acartiidae	Acartia	Cryptomycota	Incertae Sedis	Incertae Sedis	Incertae Sedis	Rozella	?	271	41
ASV1179	59	9	21	0	0	0	7	85	67	79.853	Arthropoda	Hexanauplia	Calanoida	Acartiidae	Acartia	Cryptomycota	Incertae Sedis	Incertae Sedis	Incertae Sedis	Rozella	?	273	42
ASV1278	24	11	85	0	0	0	4	36	46	79.853	Arthropoda	Hexanauplia	Calanoida	Acartiidae	Acartia	Cryptomycota	Incertae Sedis	Incertae Sedis	Incertae Sedis	Rozella	?	273	42
ASV2607	0	9	42	0	0	0	0	0	0	79.853	Arthropoda	Hexanauplia	Calanoida	Acartiidae	Acartia	Cryptomycota	Incertae Sedis	Incertae Sedis	Incertae Sedis	Rozella	?	273	41
ASV1696	24	9	25	0	0	0	4	21	37	79.705	Arthropoda	Hexanauplia	Calanoida	Acartiidae	Acartia	Cryptomycota	Incertae Sedis	Incertae Sedis	Incertae Sedis	Rozella	?	271	42
ASV743	98	12	53	130	45	11	77	67	104	81.053	Arthropoda	Hexanauplia	Calanoida	Augaptilidae	Augaptilus	Chytridiomycota	Chytridiomycetes	?	?	?	?	475	63
ASV943	39	9	32	93	23	14	42	46	82	80.632	Arthropoda	Hexanauplia	Calanoida	Augaptilidae	Augaptilus	Chytridiomycota	Chytridiomycetes	?	?	?	?	475	65
ASV2312	0	0	0	0	0	0	67	0	0	88.158	Arthropoda	Hexanauplia	Calanoida	Calocalanidae	Calocalanus	?	?	?	?	?	?	152	16
ASV2269	0	15	21	9	22	0	2	0	0	84.015	Arthropoda	Hexanauplia	Calanoida	Calocalanidae	Calocalanus	Ascomycota	Eurotiomycetes	Chaetothyriales	Herpotrichiellaceae	?	?	269	37
ASV1301	29	22	86	0	16	0	26	12	5	83.643	Arthropoda	Hexanauplia	Calanoida	Calocalanidae	Calocalanus	?	?	?	?	?	?	269	37
ASV146	0	0	0	6443	385	748	77	0	0	83.026	Arthropoda	Hexanauplia	Calanoida	Calocalanidae	Calocalanus	Apicomplexa	?	?	?	?	?	271	33
ASV214	0	0	0	3506	241	363	61	0	0	83.026	Arthropoda	Hexanauplia	Calanoida	Calocalanidae	Calocalanus	Apicomplexa	?	?	?	?	?	271	33
ASV979	0	0	0	34	0	0	70	113	137	82.971	Arthropoda	Hexanauplia	Calanoida	Calocalanidae	Calocalanus	Apicomplexa	Conoidasida	Gregarinasina	Neogregarinorida	?	?	276	36
ASV192	0	40	0	3853	314	635	64	0	0	82.657	Arthropoda	Hexanauplia	Calanoida	Calocalanidae	Calocalanus	Apicomplexa	?	?	?	?	?	271	34
ASV1881	0	0	0	14	0	0	0	32	53	82.609	Arthropoda	Hexanauplia	Calanoida	Calocalanidae	Calocalanus	Apicomplexa	Conoidasida	Gregarinasina	Neogregarinorida	?	?	276	36
ASV1808	0	0	0	6	0	0	0	44	56	82.418	Arthropoda	Hexanauplia	Calanoida	Calocalanidae	Calocalanus	Apicomplexa	Conoidasida	Gregarinasina	Neogregarinorida	?	?	273	37
ASV2513	23	7	7	3	11	0	2	2	0	82.288	Arthropoda	Hexanauplia	Calanoida	Calocalanidae	Calocalanus	Cercozoa	?	?	?	?	?	271	44
ASV2619	0	25	23	1	0	0	0	1	0	82.222	Arthropoda	Hexanauplia	Calanoida	Calocalanidae	Calocalanus	Apicomplexa	Conoidasida	Gregarinasina	Eugregarinorida	Elev-18S-1089	?	270	41
ASV1397	8	0	0	159	1	0	0	0	0	82.156	Arthropoda	Hexanauplia	Calanoida	Calocalanidae	Calocalanus	Apicomplexa	Conoidasida	Gregarinasina	Eugregarinorida	?	?	269	39
ASV2594	0	0	0	0	7	0	40	3	2	82.051	Arthropoda	Hexanauplia	Calanoida	Calocalanidae	Calocalanus	Cercozoa	?	?	?	?	?	273	41
ASV2576	16	8	3	6	15	0	0	2	2	82.022	Arthropoda	Hexanauplia	Calanoida	Calocalanidae	Calocalanus	Cercozoa	?	?	?	?	?	267	44
ASV610	104	139	41	110	193	98	129	16	18	81.985	Arthropoda	Hexanauplia	Calanoida	Calocalanidae	Calocalanus	Cercozoa	?	?	?	?	?	272	43
ASV1008	5	34	26	121	139	0	1	2	3	81.852	Arthropoda	Hexanauplia	Calanoida	Calocalanidae	Calocalanus	Cercozoa	Novel Clade 10	?	?	?	?	270	43
ASV2507	0	1	0	36	12	0	1	1	5	81.818	Arthropoda	Hexanauplia	Calanoida	Calocalanidae	Calocalanus	Zoopagomycota	Incertae Sedis	Zoopagales	?	?	?	297	37
ASV916	22	20	51	70	190	48	0	0	0	81.618	Arthropoda	Hexanauplia	Calanoida	Calocalanidae	Calocalanus	Cercozoa	Novel Clade 10	?	?	?	?	272	44
ASV932	31	42	33	62	105	71	36	3	5	81.618	Arthropoda	Hexanauplia	Calanoida	Calocalanidae	Calocalanus	Cercozoa	?	?	?	?	?	272	45
ASV1093	17	6	4	65	84	84	20	0	2	81.618	Arthropoda	Hexanauplia	Calanoida	Calocalanidae	Calocalanus	Cercozoa	?	?	?	?	?	272	44
ASV1628	53	23	6	5	31	0	1	4	5	81.55	Arthropoda	Hexanauplia	Calanoida	Calocalanidae	Calocalanus	Cercozoa	?	?	?	?	?	271	46
ASV2069	7	0	7	1	41	20	4	3	0	81.55	Arthropoda	Hexanauplia	Calanoida	Calocalanidae	Calocalanus	Cercozoa	Novel Clade 10	?	?	?	?	271	42
ASV1012	4	35	39	118	130	0	0	0	2	81.481	Arthropoda	Hexanauplia	Calanoida	Calocalanidae	Calocalanus	Cercozoa	?	?	?	?	?	270	44
ASV2011	8	50	20	3	5	0	0	0	1	81.481	Arthropoda	Hexanauplia	Calanoida	Calocalanidae	Calocalanus	Cercozoa	?	?	?	?	?	270	42
ASV740	72	153	50	82	164	17	60	0	1	81.387	Arthropoda	Hexanauplia	Calanoida	Calocalanidae	Calocalanus	Cercozoa	?	?	?	?	?	274	41
ASV2328	0	0	0	16	0	0	50	0	0	81.387	Arthropoda	Hexanauplia	Calanoida	Calocalanidae	Calocalanus	Cercozoa	Novel Clade 10	?	?	?	?	274	44
ASV2496	0	13	37	0	6	0	0	0	0	81.319	Arthropoda	Hexanauplia	Calanoida	Calocalanidae	Calocalanus	Cercozoa	Novel Clade 10	?	?	?	?	273	46
ASV1130	8	8	8	59	135	0	45	0	2	81.319	Arthropoda	Hexanauplia	Calanoida	Calocalanidae	Calocalanus	Cercozoa	Novel Clade 10	?	?	?	?	273	43
ASV788	0	68	76	159	226	0	7	1	7	81.25	Arthropoda	Hexanauplia	Calanoida	Calocalanidae	Calocalanus	Cercozoa	Novel Clade 10	?	?	?	?	272	45
ASV1046	3	35	42	98	122	0	5	0	0	81.25	Arthropoda	Hexanauplia	Calanoida	Calocalanidae	Calocalanus	Cercozoa	?	?	?	?	?	272	45
ASV1057	25	24	28	33	78	75	23	2	9	81.25	Arthropoda	Hexanauplia	Calanoida	Calocalanidae	Calocalanus	Cercozoa	?	?	?	?	?	272	45
ASV2733	0	0	0	20	23	0	2	0	0	80.443	Arthropoda	Hexanauplia	Calanoida	Calocalanidae	Calocalanus	Cercozoa	Cercomonadidae	?	?	?	?	271	42
ASV1189	7	116	95	8	14	0	0	2	0	80.127	Arthropoda	Hexanauplia	Calanoida	Calocalanidae	Calocalanus	LKM15	?	?	?	?	?	473	73
ASV2606	0	0	0	14	27	9	1	0	0	79.412	Arthropoda	Hexanauplia	Calanoida	Calocalanidae	Calocalanus	Cercozoa	Glissomonadida	?	?	?	?	272	50
ASV2099	0	0	0	0	0	0	80	0	0	79.158	Arthropoda	Hexanauplia	Calanoida	Calocalanidae	Calocalanus	Chytridiomycota	Chytridiomycetes	Gromochytriales	?	?	?	475	79
ASV1927	0	0	0	0	0	0	95	0	0	79.14	Arthropoda	Hexanauplia	Calanoida	Calocalanidae	Calocalanus	Chytridiomycota	Chytridiomycetes	Gromochytriales	?	?	?	465	75
ASV1768	4	7	18	26	31	20	5	0	0	79.044	Arthropoda	Hexanauplia	Calanoida	Calocalanidae	Calocalanus	Cercozoa	Glissomonadida	?	?	?	?	272	51
ASV1541	0	0	0	67	73	0	0	0	0	78.467	Arthropoda	Hexanauplia	Calanoida	Calocalanidae	Calocalanus	Cryptomycota	Incertae Sedis	?	?	?	?	274	47
ASV881	0	0	0	124	93	43	177	0	4	78.158	Arthropoda	Hexanauplia	Calanoida	Calocalanidae	Calocalanus	Ciliophora	Intramacronucleata	?	?	?	?	467	77
ASV872	0	0	0	154	96	40	147	0	8	77.143	Arthropoda	Hexanauplia	Calanoida	Calocalanidae	Calocalanus	Ciliophora	Intramacronucleata	?	?	?	?	455	79
ASV473	321	48	603	33	129	0	12	39	83	81.413	Arthropoda	Hexanauplia	Calanoida	Candaciidae	Candacia	?	?	?	?	?	?	269	43
ASV2672	15	10	9	0	0	0	0	2	11	80.335	Arthropoda	Hexanauplia	Calanoida	Candaciidae	Candacia	Chytridiomycota	Monoblepharidomycetes	Monoblepharidales	?	?	?	478	67
ASV2028	10	0	0	0	0	0	0	30	45	80.126	Arthropoda	Hexanauplia	Calanoida	Candaciidae	Candacia	Chytridiomycota	Monoblepharidomycetes	Monoblepharidales	Gonapodyaceae	Gonapodya	Gonapodya polymorpha	478	64
ASV2782	16	5	17	0	0	0	0	3	3	79.498	Arthropoda	Hexanauplia	Calanoida	Candaciidae	Candacia	Chytridiomycota	Monoblepharidomycetes	Monoblepharidales	?	?	?	478	71
ASV665	75	33	23	0	0	0	379	97	102	91.667	Arthropoda	Hexanauplia	Calanoida	Centropagidae	Isias							84	7
ASV941	36	35	12	0	0	0	212	46	40	91.667	Arthropoda	Hexanauplia	Calanoida	Centropagidae	Isias							84	7
ASV1082	41	28	7	0	0	0	121	40	53	91.667	Arthropoda	Hexanauplia	Calanoida	Centropagidae	Isias							84	7
ASV1050	45	26	8	0	0	0	148	24	52	90.476	Arthropoda	Hexanauplia	Calanoida	Centropagidae	Isias							84	8
ASV2824	7	6	0	7	0	0	7	6	8	84.015	Arthropoda	Hexanauplia	Calanoida	Centropagidae	Centropages	Protalveolata	Perkinsidae	A31	?	?	?	269	39
ASV2180	0	76	0	0	0	0	0	0	0	80.364	Arthropoda	Hexanauplia	Calanoida	Centropagidae	Centropages	Apicomplexa	Conoidasida	Gregarinasina	?	?	?	275	34
ASV1246	11	45	138	0	0	0	0	13	12	87.104	Arthropoda	Hexanauplia	Calanoida	Clausocalanidae	Pseudocalanus	Arthropoda	Arachnida	?	?	?	?	473	43
ASV1562	0	0	0	75	61	0	0	0	0	86.577	Arthropoda	Hexanauplia	Calanoida	Clausocalanidae	Pseudocalanus	Cryptomycota	Incertae Sedis	?	?	?	?	149	20
ASV2038	0	0	0	58	27	0	0	0	0	86.395	Arthropoda	Hexanauplia	Calanoida	Clausocalanidae	Pseudocalanus	Cryptomycota	Incertae Sedis	?	?	?	?	147	20
ASV2626	1	0	2	0	0	0	0	10	37	100	Arthropoda	Hexanauplia	Calanoida	Diaptomidae	Skistodiaptomus	Arthropoda	Maxillopoda	Calanoida	?	?	?	171	0
ASV1784	3	8	0	0	0	0	0	65	34	99.524	Arthropoda	Hexanauplia	Calanoida	Diaptomidae	Skistodiaptomus	Arthropoda	Maxillopoda	Calanoida	?	?	?	210	1
ASV2727	5	1	0	0	0	0	0	23	16	99.474	Arthropoda	Hexanauplia	Calanoida	Diaptomidae	Skistodiaptomus	Arthropoda	Maxillopoda	Calanoida	?	?	?	190	1
ASV2252	7	2	0	0	0	0	0	13	48	99.405	Arthropoda	Hexanauplia	Calanoida	Diaptomidae	Skistodiaptomus	Arthropoda	Maxillopoda	Calanoida	?	?	?	168	1
ASV555	287	129	36	0	0	0	0	241	301	98.896	Arthropoda	Hexanauplia	Calanoida	Diaptomidae	Skistodiaptomus	Arthropoda	Maxillopoda	Calanoida	?	?	?	453	5
ASV1122	69	17	11	0	0	0	0	62	109	98.837	Arthropoda	Hexanauplia	Calanoida	Diaptomidae	Skistodiaptomus	Arthropoda	Maxillopoda	Calanoida	?	?	?	344	4
ASV1073	64	48	6	0	0	0	0	62	113	98.756	Arthropoda	Hexanauplia	Calanoida	Diaptomidae	Skistodiaptomus	Arthropoda	Maxillopoda	Calanoida	?	?	?	402	5
ASV244	821	548	61	0	0	0	0	887	1197	98.715	Arthropoda	Hexanauplia	Calanoida	Diaptomidae	Skistodiaptomus	Arthropoda	Maxillopoda	Calanoida	?	?	?	467	6
ASV424	444	224	40	0	0	0	0	261	511	98.715	Arthropoda	Hexanauplia	Calanoida	Diaptomidae	Skistodiaptomus	Arthropoda	Maxillopoda	Calanoida	?	?	?	467	6
ASV112	2687	1689	314	0	0	0	1	2162	3770	98.71	Arthropoda	Hexanauplia	Calanoida	Diaptomidae	Skistodiaptomus	Arthropoda	Maxillopoda	Calanoida	?	?	?	465	6
ASV122	2668	1364	229	0	0	0	1	2402	3149	98.71	Arthropoda	Hexanauplia	Calanoida	Diaptomidae	Skistodiaptomus	Arthropoda	Maxillopoda	Calanoida	?	?	?	465	6
ASV226	1124	572	79	0	0	0	1	969	1237	98.71	Arthropoda	Hexanauplia	Calanoida	Diaptomidae	Skistodiaptomus	Arthropoda	Maxillopoda	Calanoida	?	?	?	465	6
ASV469	403	130	41	0	0	0	0	383	317	98.71	Arthropoda	Hexanauplia	Calanoida	Diaptomidae	Skistodiaptomus	Arthropoda	Maxillopoda	Calanoida	?	?	?	465	6
ASV421	359	234	31	0	0	0	0	417	450	98.71	Arthropoda	Hexanauplia	Calanoida	Diaptomidae	Skistodiaptomus	Arthropoda	Maxillopoda	Calanoida	?	?	?	465	6
ASV260	905	475	52	0	0	0	0	724	993	98.704	Arthropoda	Hexanauplia	Calanoida	Diaptomidae	Skistodiaptomus	Arthropoda	Maxillopoda	Calanoida	?	?	?	463	6
ASV307	926	1218	83	0	0	0	0	80	89	98.693	Arthropoda	Hexanauplia	Calanoida	Diaptomidae	Skistodiaptomus	Arthropoda	Maxillopoda	Calanoida	?	?	?	459	6
ASV206	1182	682	47	0	0	0	1	1102	1408	98.681	Arthropoda	Hexanauplia	Calanoida	Diaptomidae	Skistodiaptomus	Arthropoda	Maxillopoda	Calanoida	?	?	?	455	6
ASV1124	61	44	5	0	0	0	0	48	109	98.681	Arthropoda	Hexanauplia	Calanoida	Diaptomidae	Skistodiaptomus	Arthropoda	Maxillopoda	Calanoida	?	?	?	379	5
ASV631	208	136	28	0	0	0	2	172	241	98.675	Arthropoda	Hexanauplia	Calanoida	Diaptomidae	Skistodiaptomus	Arthropoda	Maxillopoda	Calanoida	?	?	?	453	6
ASV288	740	454	52	0	0	0	1	616	888	98.673	Arthropoda	Hexanauplia	Calanoida	Diaptomidae	Skistodiaptomus	Arthropoda	Maxillopoda	Calanoida	?	?	?	452	6
ASV97	2077	1665	125	0	0	0	3	3652	6997	98.652	Arthropoda	Hexanauplia	Calanoida	Diaptomidae	Skistodiaptomus	Arthropoda	Maxillopoda	Calanoida	?	?	?	445	5
ASV1142	58	27	14	0	0	0	1	54	108	98.615	Arthropoda	Hexanauplia	Calanoida	Diaptomidae	Hemidiaptomus	Arthropoda	Maxillopoda	Calanoida	?	?	?	361	4
ASV13	26708	17804	3369	17	1	0	28	26069	40174	98.501	Arthropoda	Hexanauplia	Calanoida	Diaptomidae	Skistodiaptomus	Arthropoda	Maxillopoda	Calanoida	?	?	?	467	7
ASV115	2719	1622	263	0	0	0	0	2164	3623	98.501	Arthropoda	Hexanauplia	Calanoida	Diaptomidae	Skistodiaptomus	Arthropoda	Maxillopoda	Calanoida	?	?	?	467	7
ASV165	1851	999	112	0	0	0	0	1405	1972	98.501	Arthropoda	Hexanauplia	Calanoida	Diaptomidae	Skistodiaptomus	Arthropoda	Maxillopoda	Calanoida	?	?	?	467	7
ASV220	1112	450	50	0	0	0	0	1294	1187	98.501	Arthropoda	Hexanauplia	Calanoida	Diaptomidae	Skistodiaptomus	Arthropoda	Maxillopoda	Calanoida	?	?	?	467	7
ASV234	1005	597	94	1	0	0	1	768	1270	98.501	Arthropoda	Hexanauplia	Calanoida	Diaptomidae	Skistodiaptomus	Arthropoda	Maxillopoda	Calanoida	?	?	?	467	7
ASV246	917	553	99	0	0	0	1	646	1224	98.501	Arthropoda	Hexanauplia	Calanoida	Diaptomidae	Skistodiaptomus	Arthropoda	Maxillopoda	Calanoida	?	?	?	467	7
ASV423	421	240	19	0	0	0	0	261	540	98.501	Arthropoda	Hexanauplia	Calanoida	Diaptomidae	Skistodiaptomus	Arthropoda	Maxillopoda	Calanoida	?	?	?	467	7
ASV533	282	218	21	0	0	0	0	249	283	98.501	Arthropoda	Hexanauplia	Calanoida	Diaptomidae	Skistodiaptomus	Arthropoda	Maxillopoda	Calanoida	?	?	?	467	7
ASV1205	46	42	5	0	0	0	1	56	87	98.5	Arthropoda	Hexanauplia	Calanoida	Diaptomidae	Eudiaptomus	Arthropoda	Maxillopoda	Calanoida	?	?	?	200	3
ASV150	2245	1186	188	0	0	0	0	1706	2150	98.498	Arthropoda	Hexanauplia	Calanoida	Diaptomidae	Skistodiaptomus	Arthropoda	Maxillopoda	Calanoida	?	?	?	466	7
ASV185	1417	737	91	0	0	0	0	1254	1593	98.498	Arthropoda	Hexanauplia	Calanoida	Diaptomidae	Skistodiaptomus	Arthropoda	Maxillopoda	Calanoida	?	?	?	466	7
ASV9	29937	19088	3290	9	0	2	45	29811	48795	98.495	Arthropoda	Hexanauplia	Calanoida	Diaptomidae	Skistodiaptomus	Arthropoda	Maxillopoda	Calanoida	?	?	?	465	7
ASV137	2549	1359	172	0	0	0	4	1878	2539	98.495	Arthropoda	Hexanauplia	Calanoida	Diaptomidae	Skistodiaptomus	Arthropoda	Maxillopoda	Calanoida	?	?	?	465	6
ASV269	1380	1461	75	0	0	0	0	68	75	98.495	Arthropoda	Hexanauplia	Calanoida	Diaptomidae	Skistodiaptomus	Arthropoda	Maxillopoda	Calanoida	?	?	?	465	7
ASV274	763	435	74	0	0	0	1	646	1071	98.495	Arthropoda	Hexanauplia	Calanoida	Diaptomidae	Skistodiaptomus	Arthropoda	Maxillopoda	Calanoida	?	?	?	465	7
ASV349	485	325	54	0	0	0	0	364	751	98.495	Arthropoda	Hexanauplia	Calanoida	Diaptomidae	Skistodiaptomus	Arthropoda	Maxillopoda	Calanoida	?	?	?	465	7
ASV457	347	231	31	1	0	0	0	269	458	98.495	Arthropoda	Hexanauplia	Calanoida	Diaptomidae	Skistodiaptomus	Arthropoda	Maxillopoda	Calanoida	?	?	?	465	7
ASV747	138	87	11	0	0	0	3	120	232	98.495	Arthropoda	Hexanauplia	Calanoida	Diaptomidae	Skistodiaptomus	Arthropoda	Maxillopoda	Calanoida	?	?	?	465	7
ASV454	446	149	22	0	0	1	0	409	316	98.491	Arthropoda	Hexanauplia	Calanoida	Diaptomidae	Skistodiaptomus	Arthropoda	Maxillopoda	Calanoida	?	?	?	464	7
ASV481	347	195	28	0	0	0	1	320	361	98.491	Arthropoda	Hexanauplia	Calanoida	Diaptomidae	Skistodiaptomus	Arthropoda	Maxillopoda	Calanoida	?	?	?	464	7
ASV419	438	256	38	2	0	0	0	335	432	98.485	Arthropoda	Hexanauplia	Calanoida	Diaptomidae	Skistodiaptomus	Arthropoda	Maxillopoda	Calanoida	?	?	?	462	7
ASV215	1190	788	101	0	0	0	0	969	1095	98.462	Arthropoda	Hexanauplia	Calanoida	Diaptomidae	Skistodiaptomus	Arthropoda	Maxillopoda	Calanoida	?	?	?	455	7
ASV321	65	23	15	0	0	0	0	954	1197	98.462	Arthropoda	Hexanauplia	Calanoida	Diaptomidae	Skistodiaptomus	Arthropoda	Maxillopoda	Calanoida	?	?	?	455	7
ASV358	544	247	42	0	0	0	0	448	613	98.462	Arthropoda	Hexanauplia	Calanoida	Diaptomidae	Skistodiaptomus	Arthropoda	Maxillopoda	Calanoida	?	?	?	455	7
ASV532	303	194	35	0	0	0	0	223	303	98.455	Arthropoda	Hexanauplia	Calanoida	Diaptomidae	Skistodiaptomus	Arthropoda	Maxillopoda	Calanoida	?	?	?	453	7
ASV523	250	170	13	0	0	0	0	272	387	98.451	Arthropoda	Hexanauplia	Calanoida	Diaptomidae	Skistodiaptomus	Arthropoda	Maxillopoda	Calanoida	?	?	?	452	7
ASV194	1228	748	126	1	0	0	0	966	1764	98.287	Arthropoda	Hexanauplia	Calanoida	Diaptomidae	Skistodiaptomus	Arthropoda	Maxillopoda	Calanoida	?	?	?	467	8
ASV330	612	352	48	1	0	0	4	506	619	98.287	Arthropoda	Hexanauplia	Calanoida	Diaptomidae	Skistodiaptomus	Arthropoda	Maxillopoda	Calanoida	?	?	?	467	8
ASV403	383	284	46	0	0	0	0	303	557	98.287	Arthropoda	Hexanauplia	Calanoida	Diaptomidae	Skistodiaptomus	Arthropoda	Maxillopoda	Calanoida	?	?	?	467	8
ASV416	390	257	39	0	0	0	0	324	512	98.287	Arthropoda	Hexanauplia	Calanoida	Diaptomidae	Skistodiaptomus	Arthropoda	Maxillopoda	Calanoida	?	?	?	467	8
ASV1004	54	25	4	0	0	0	1	118	131	98.287	Arthropoda	Hexanauplia	Calanoida	Diaptomidae	Skistodiaptomus	Arthropoda	Maxillopoda	Calanoida	?	?	?	467	8
ASV1187	58	59	0	0	0	0	1	54	71	98.287	Arthropoda	Hexanauplia	Calanoida	Diaptomidae	Skistodiaptomus	Arthropoda	Maxillopoda	Calanoida	?	?	?	467	8
ASV222	1253	592	96	0	0	0	0	858	1267	98.28	Arthropoda	Hexanauplia	Calanoida	Diaptomidae	Skistodiaptomus	Arthropoda	Maxillopoda	Calanoida	?	?	?	465	8
ASV388	449	275	59	0	0	0	1	319	586	98.28	Arthropoda	Hexanauplia	Calanoida	Diaptomidae	Skistodiaptomus	Arthropoda	Maxillopoda	Calanoida	?	?	?	465	8
ASV409	453	225	29	0	0	0	0	385	450	98.28	Arthropoda	Hexanauplia	Calanoida	Diaptomidae	Skistodiaptomus	Arthropoda	Maxillopoda	Calanoida	?	?	?	465	8
ASV823	131	68	9	0	0	0	2	83	202	98.28	Arthropoda	Hexanauplia	Calanoida	Diaptomidae	Skistodiaptomus	Arthropoda	Maxillopoda	Calanoida	?	?	?	465	8
ASV365	549	354	51	0	0	0	1	409	483	98.272	Arthropoda	Hexanauplia	Calanoida	Diaptomidae	Skistodiaptomus	Arthropoda	Maxillopoda	Calanoida	?	?	?	463	8
ASV334	637	358	67	0	0	0	0	445	594	98.238	Arthropoda	Hexanauplia	Calanoida	Diaptomidae	Skistodiaptomus	Arthropoda	Maxillopoda	Calanoida	?	?	?	454	8
ASV27	13865	11493	463	1	0	0	23	16594	28821	98.234	Arthropoda	Hexanauplia	Calanoida	Diaptomidae	Skistodiaptomus	Arthropoda	Maxillopoda	Calanoida	?	?	?	453	8
ASV1180	68	34	3	0	0	0	0	52	90	98.193	Arthropoda	Hexanauplia	Calanoida	Diaptomidae	Skistodiaptomus	Arthropoda	Maxillopoda	Calanoida	?	?	?	332	6
ASV2396	46	10	0	0	0	0	6	0	0	98.127	Arthropoda	Hexanauplia	Calanoida	Diaptomidae	Eudiaptomus	Arthropoda	Maxillopoda	Calanoida	?	?	?	267	5
ASV935	101	61	5	0	0	0	0	92	127	98.118	Arthropoda	Hexanauplia	Calanoida	Diaptomidae	Skistodiaptomus	Arthropoda	Maxillopoda	Calanoida	?	?	?	372	7
ASV1	107615	46734	6562	16	0	0	68	87609	116214	98.073	Arthropoda	Hexanauplia	Calanoida	Diaptomidae	Skistodiaptomus	Arthropoda	Maxillopoda	Calanoida	?	?	?	467	9
ASV281	783	457	76	0	0	0	1	579	991	98.073	Arthropoda	Hexanauplia	Calanoida	Diaptomidae	Skistodiaptomus	Arthropoda	Maxillopoda	Calanoida	?	?	?	467	9
ASV297	769	382	44	0	0	0	2	532	874	98.073	Arthropoda	Hexanauplia	Calanoida	Diaptomidae	Skistodiaptomus	Arthropoda	Maxillopoda	Calanoida	?	?	?	467	9
ASV302	677	457	157	0	0	0	0	448	788	98.073	Arthropoda	Hexanauplia	Calanoida	Diaptomidae	Skistodiaptomus	Arthropoda	Maxillopoda	Calanoida	?	?	?	467	9
ASV477	349	193	15	0	0	0	0	283	417	98.073	Arthropoda	Hexanauplia	Calanoida	Diaptomidae	Skistodiaptomus	Arthropoda	Maxillopoda	Calanoida	?	?	?	467	9
ASV710	182	93	4	0	0	0	1	130	227	98.073	Arthropoda	Hexanauplia	Calanoida	Diaptomidae	Skistodiaptomus	Arthropoda	Maxillopoda	Calanoida	?	?	?	467	9
ASV715	143	94	22	0	0	0	1	105	263	98.065	Arthropoda	Hexanauplia	Calanoida	Diaptomidae	Skistodiaptomus	Arthropoda	Maxillopoda	Calanoida	?	?	?	465	8
ASV1077	85	41	9	0	0	0	1	54	102	98.065	Arthropoda	Hexanauplia	Calanoida	Diaptomidae	Skistodiaptomus	Arthropoda	Maxillopoda	Calanoida	?	?	?	465	9
ASV372	476	300	52	0	0	0	0	352	615	97.859	Arthropoda	Hexanauplia	Calanoida	Diaptomidae	Skistodiaptomus	Arthropoda	Maxillopoda	Calanoida	?	?	?	467	10
ASV519	289	187	29	0	0	2	2	210	381	97.859	Arthropoda	Hexanauplia	Calanoida	Diaptomidae	Skistodiaptomus	Arthropoda	Maxillopoda	Calanoida	?	?	?	467	10
ASV495	324	199	31	0	0	0	1	214	418	97.859	Arthropoda	Hexanauplia	Calanoida	Diaptomidae	Skistodiaptomus	Arthropoda	Maxillopoda	Calanoida	?	?	?	467	10
ASV373	544	341	48	0	0	0	1	407	454	97.645	Arthropoda	Hexanauplia	Calanoida	Diaptomidae	Skistodiaptomus	Arthropoda	Maxillopoda	Calanoida	?	?	?	467	11
ASV370	532	282	52	3	0	0	0	340	597	97.634	Arthropoda	Hexanauplia	Calanoida	Diaptomidae	Skistodiaptomus	Arthropoda	Maxillopoda	Calanoida	?	?	?	465	11
ASV925	54	55	12	0	0	0	0	82	188	97.6	Arthropoda	Hexanauplia	Calanoida	Diaptomidae	Eudiaptomus	Arthropoda	Maxillopoda	Calanoida	?	?	?	250	6
ASV1244	44	49	1	0	0	0	0	40	86	97.6	Arthropoda	Hexanauplia	Calanoida	Diaptomidae	Eudiaptomus	Arthropoda	Maxillopoda	Calanoida	?	?	?	250	6
ASV193	1827	634	131	1	0	0	0	1120	1122	96.795	Arthropoda	Hexanauplia	Calanoida	Diaptomidae	Diaptomus	Arthropoda	Maxillopoda	Calanoida	?	?	?	468	14
ASV435	410	284	35	1	0	0	0	315	388	95.279	Arthropoda	Hexanauplia	Calanoida	Diaptomidae	Skistodiaptomus	Arthropoda	Maxillopoda	Calanoida	?	?	?	466	22
ASV141	234	3586	3712	104	74	314	0	0	0	94.004	Arthropoda	Hexanauplia	Calanoida	Diaptomidae	Skistodiaptomus	Arthropoda	Maxillopoda	Calanoida	?	?	?	467	28
ASV312	661	356	57	0	0	0	0	528	713	94.004	Arthropoda	Hexanauplia	Calanoida	Diaptomidae	Skistodiaptomus	Arthropoda	Maxillopoda	Calanoida	?	?	?	467	26
ASV568	261	125	16	0	0	0	0	245	309	93.258	Arthropoda	Hexanauplia	Calanoida	Diaptomidae	Eudiaptomus	Arthropoda	Maxillopoda	Calanoida	?	?	?	267	14
ASV5	52295	26621	3560	14	0	0	51	45450	59776	92.537	Arthropoda	Hexanauplia	Calanoida	Diaptomidae	Copidodiaptomus	Arthropoda	Maxillopoda	?	?	?	?	469	33
ASV4	65814	33874	6087	15	1	0	56	47548	57193	92.505	Arthropoda	Hexanauplia	Calanoida	Diaptomidae	Copidodiaptomus	Arthropoda	Maxillopoda	?	?	?	?	467	33
ASV368	512	250	41	0	0	0	0	465	553	92.123	Arthropoda	Hexanauplia	Calanoida	Diaptomidae	Skistodiaptomus	Arthropoda	Maxillopoda	Calanoida	?	?	?	457	32
ASV1494	61	6	38	0	4	0	3	18	19	86.92	Arthropoda	Hexanauplia	Calanoida	Diaptomidae	Eudiaptomus	?	?	?	?	?	?	474	43
ASV2102	0	0	0	2	0	62	0	0	16	83.764	Arthropoda	Hexanauplia	Calanoida	Diaptomidae	Neodiaptomus	Phragmoplastophyta	Embryophyta	Rosales	?	?	?	271	36
ASV179	0	0	0	6	0	5275	0	1	0	79.21	Arthropoda	Hexanauplia	Calanoida	Diaptomidae	Arctodiaptomus	Phragmoplastophyta	Embryophyta	Ericales	?	?	?	481	67
ASV2556	9	9	35	0	0	0	0	0	0	84.502	Arthropoda	Hexanauplia	Calanoida	Mecynoceridae	Mecynocera	?	?	?	?	?	?	271	35
ASV1897	15	3	3	0	0	0	55	13	9	84.328	Arthropoda	Hexanauplia	Calanoida	Mecynoceridae	Mecynocera	Chytridiomycota	Chytridiomycetes	Lobulomycetales	Lobulomycetaceae	?	?	268	35
ASV1228	7	0	0	31	34	19	49	31	56	84.074	Arthropoda	Hexanauplia	Calanoida	Mecynoceridae	Mecynocera	Ciliophora	Intramacronucleata	Conthreep	Colpodea	Platyophrya	metagenome	270	36
ASV2538	19	0	0	14	0	0	22	0	0	84.015	Arthropoda	Hexanauplia	Calanoida	Mecynoceridae	Mecynocera	Cryptomycota	Incertae Sedis	Incertae Sedis	Incertae Sedis	?	?	269	35
ASV2570	0	0	9	0	0	0	22	7	15	81.985	Arthropoda	Hexanauplia	Calanoida	Mecynoceridae	Mecynocera	Ciliophora	Intramacronucleata	Conthreep	Oligohymenophorea	?	?	272	39
ASV2842	0	7	18	0	0	0	0	6	10	81.673	Arthropoda	Hexanauplia	Calanoida	Mecynoceridae	Mecynocera	?	?	?	?	?	uncultured fungus	251	40
ASV663	49	8	34	101	208	128	173	7	2	81.55	Arthropoda	Hexanauplia	Calanoida	Mecynoceridae	Mecynocera	?	?	?	?	?	?	271	46
ASV2369	3	0	0	0	0	0	10	26	24	81.481	Arthropoda	Hexanauplia	Calanoida	Mecynoceridae	Mecynocera	Cryptomycota	?	?	?	?	?	270	38
ASV343	0	0	0	1867	115	35	0	0	0	80.297	Arthropoda	Hexanauplia	Calanoida	Mecynoceridae	Mecynocera	Chytridiomycota	Chytridiomycetes	?	?	?	?	472	77
ASV2809	0	3	0	0	0	0	3	19	17	79.873	Arthropoda	Hexanauplia	Calanoida	Mecynoceridae	Mecynocera	Chytridiomycota	Chytridiomycetes	Rhizophydiales	?	?	?	472	78
ASV1119	41	49	72	6	3	3	79	12	6	79.779	Arthropoda	Hexanauplia	Calanoida	Mecynoceridae	Mecynocera	?	Choanoflagellida	Codonosigidae	?	?	?	272	50
ASV687	0	0	4	0	0	0	671	0	0	79.757	Arthropoda	Hexanauplia	Calanoida	Mecynoceridae	Mecynocera	Ciliophora	Postciliodesmatophora	Heterotrichea	?	?	?	247	41
ASV2176	8	0	49	0	0	0	0	11	8	79.661	Arthropoda	Hexanauplia	Calanoida	Mecynoceridae	Mecynocera	Apicomplexa	Aconoidasida	Piroplasmorida	?	?	uncultured alveolate	472	74
ASV207	9	11	6	0	17	0	4318	0	0	79.63	Arthropoda	Hexanauplia	Calanoida	Mecynoceridae	Mecynocera	Ciliophora	Postciliodesmatophora	Heterotrichea	?	?	?	270	47
ASV497	5	5	0	0	1	0	1163	0	0	79.63	Arthropoda	Hexanauplia	Calanoida	Mecynoceridae	Mecynocera	Ciliophora	Postciliodesmatophora	Heterotrichea	?	?	?	270	47
ASV317	1	2	0	0	3	0	2278	0	0	79.478	Arthropoda	Hexanauplia	Calanoida	Mecynoceridae	Mecynocera	Ciliophora	Postciliodesmatophora	Heterotrichea	?	?	?	268	47
ASV120	299	9	9764	0	0	0	0	0	0	79.362	Arthropoda	Hexanauplia	Calanoida	Mecynoceridae	Mecynocera	Apicomplexa	Aconoidasida	Piroplasmorida	?	?	uncultured alveolate	470	75
ASV731	23	6	579	0	0	0	0	1	4	79.149	Arthropoda	Hexanauplia	Calanoida	Mecynoceridae	Mecynocera	Apicomplexa	Aconoidasida	Piroplasmorida	?	?	uncultured alveolate	470	76
ASV75	679	55	20825	10	17	0	0	19	46	78.936	Arthropoda	Hexanauplia	Calanoida	Mecynoceridae	Mecynocera	Apicomplexa	Aconoidasida	Piroplasmorida	?	?	uncultured alveolate	470	77
ASV157	306	13	6443	0	0	0	0	0	0	78.936	Arthropoda	Hexanauplia	Calanoida	Mecynoceridae	Mecynocera	Apicomplexa	Aconoidasida	Piroplasmorida	?	?	uncultured alveolate	470	77
ASV500	11	4	1134	0	0	0	0	1	6	78.913	Arthropoda	Hexanauplia	Calanoida	Mecynoceridae	Mecynocera	Apicomplexa	Aconoidasida	Piroplasmorida	?	?	uncultured alveolate	460	75
ASV2756	6	10	0	8	20	0	0	0	0	78.769	Arthropoda	Hexanauplia	Calanoida	Mecynoceridae	Mecynocera	Apicomplexa	Aconoidasida	Piroplasmorida	?	?	uncultured alveolate	471	79
ASV2428	60	0	0	0	0	0	0	0	0	78.333	Arthropoda	Hexanauplia	Calanoida	Mecynoceridae	Mecynocera	?	?	?	?	?	?	480	80
ASV2880	0	17	23	0	0	0	0	0	0	78.333	Arthropoda	Hexanauplia	Calanoida	Mecynoceridae	Mecynocera	Apicomplexa	Conoidasida	Gregarinasina	Neogregarinorida	?	?	480	68
ASV1809	0	43	63	0	0	0	0	0	0	78.243	Arthropoda	Hexanauplia	Calanoida	Mecynoceridae	Mecynocera	Apicomplexa	Conoidasida	Gregarinasina	Neogregarinorida	?	?	478	68
ASV751	3	0	506	0	0	0	0	23	55	77.263	Arthropoda	Hexanauplia	Calanoida	Mecynoceridae	Mecynocera	Apicomplexa	Conoidasida	Gregarinasina	Eugregarinorida	?	?	475	71
ASV1075	123	13	91	0	0	0	59	2	4	83.643	Arthropoda	Hexanauplia	Calanoida	Metridinidae	Metridia	Cryptomycota	?	?	?	?	?	269	40
ASV396	240	195	881	14	1	0	160	59	86	83.271	Arthropoda	Hexanauplia	Calanoida	Metridinidae	Metridia	Cryptomycota	?	?	?	?	?	269	41
ASV971	170	9	69	0	0	0	98	7	5	83.271	Arthropoda	Hexanauplia	Calanoida	Metridinidae	Metridia	Cryptomycota	?	?	?	?	?	269	41
ASV1060	10	93	168	17	2	0	6	1	0	83.271	Arthropoda	Hexanauplia	Calanoida	Metridinidae	Metridia	Cryptomycota	?	?	?	?	?	269	41
ASV661	88	68	336	7	1	0	112	54	50	83.209	Arthropoda	Hexanauplia	Calanoida	Metridinidae	Gaussia	Cryptomycota	?	?	?	?	?	268	39
ASV1148	2	46	200	8	3	0	2	0	0	82.955	Arthropoda	Hexanauplia	Calanoida	Metridinidae	Metridia	Cryptomycota	?	?	?	?	?	176	26
ASV922	74	36	244	7	1	0	31	0	0	82.9	Arthropoda	Hexanauplia	Calanoida	Metridinidae	Metridia	Cryptomycota	?	?	?	?	?	269	42
ASV2728	0	0	0	0	0	0	0	20	25	82.553	Arthropoda	Hexanauplia	Calanoida	Metridinidae	Gaussia	Chytridiomycota	Chytridiomycetes	Rhizophydiales	?	?	?	470	66
ASV2828	25	0	16	0	0	0	0	0	0	81.992	Arthropoda	Hexanauplia	Calanoida	Metridinidae	Pleuromamma	Chytridiomycota	Chytridiomycetes	?	?	?	?	472	67
ASV1235	110	115	0	0	0	0	0	0	0	81.875	Arthropoda	Hexanauplia	Calanoida	Metridinidae	Gaussia	Chytridiomycota	Chytridiomycetes	Spizellomycetales	Powellomycetaceae	?	?	480	55
ASV233	0	0	0	3386	241	142	0	0	0	80.519	Arthropoda	Hexanauplia	Calanoida	Metridinidae	Gaussia	Chytridiomycota	Chytridiomycetes	Rhizophydiales	Kappamycetaceae	?	?	462	72
ASV1143	261	1	0	0	0	0	0	0	0	79.281	Arthropoda	Hexanauplia	Calanoida	Metridinidae	Gaussia	Ciliophora	Intramacronucleata	Conthreep	Colpodea	Hausmanniella	Hausmanniella discoidea	473	71
ASV2204	73	0	1	0	0	0	0	0	0	79.193	Arthropoda	Hexanauplia	Calanoida	Metridinidae	Gaussia	Ciliophora	Intramacronucleata	Conthreep	Colpodea	Hausmanniella	Hausmanniella discoidea	471	71
ASV2456	57	0	1	0	0	0	0	0	0	79.193	Arthropoda	Hexanauplia	Calanoida	Metridinidae	Gaussia	Ciliophora	Intramacronucleata	Conthreep	Colpodea	Hausmanniella	Hausmanniella discoidea	471	71
ASV1488	0	0	0	70	66	10	3	0	0	78.936	Arthropoda	Hexanauplia	Calanoida	Metridinidae	Gaussia	Ciliophora	Intramacronucleata	Conthreep	Colpodea	?	?	470	73
ASV1043	0	0	0	99	107	94	4	0	1	78.846	Arthropoda	Hexanauplia	Calanoida	Metridinidae	Gaussia	Ciliophora	Intramacronucleata	Conthreep	Colpodea	?	?	468	73
ASV1645	0	0	0	58	45	19	4	0	0	78.723	Arthropoda	Hexanauplia	Calanoida	Metridinidae	Gaussia	Ciliophora	Intramacronucleata	Conthreep	Colpodea	?	?	470	74
ASV904	0	0	0	140	175	75	18	0	3	78.632	Arthropoda	Hexanauplia	Calanoida	Metridinidae	Gaussia	Ciliophora	Intramacronucleata	Conthreep	Colpodea	?	?	468	74
ASV1467	0	0	0	31	47	76	0	0	0	78.419	Arthropoda	Hexanauplia	Calanoida	Metridinidae	Gaussia	Ciliophora	Intramacronucleata	Conthreep	Colpodea	?	?	468	75
ASV1234	0	0	0	94	86	29	13	1	2	78.344	Arthropoda	Hexanauplia	Calanoida	Metridinidae	Gaussia	Ciliophora	Intramacronucleata	Conthreep	Colpodea	?	?	471	70
ASV2353	0	0	0	56	7	0	0	0	1	76.371	Arthropoda	Hexanauplia	Calanoida	Metridinidae	Metridia	Protalveolata	Syndiniales	?	?	?	?	474	89
ASV2305	0	0	0	67	0	0	0	0	0	76.261	Arthropoda	Hexanauplia	Calanoida	Metridinidae	Metridia	Protalveolata	Syndiniales	?	?	?	?	476	90
ASV2525	0	0	0	8	24	23	0	0	0	76.19	Arthropoda	Hexanauplia	Calanoida	Metridinidae	Pleuromamma	Nematozoa	Chromadorea	Rhabditida	?	?	Euteratocephalus palustris	273	44
ASV1676	0	0	0	0	29	65	28	0	0	85.502	Arthropoda	Hexanauplia	Calanoida	Paracalanidae	Parvocalanus	Ciliophora	Intramacronucleata	Conthreep	Oligohymenophorea	?	?	269	32
ASV1529	39	11	61	0	0	0	0	15	16	83.193	Arthropoda	Hexanauplia	Calanoida	Paracalanidae	Parvocalanus	Chytridiomycota	Chytridiomycetes	Incertae Sedis	?	?	?	476	58
ASV261	468	1	0	765	401	1509	0	0	0	82.593	Arthropoda	Hexanauplia	Calanoida	Paracalanidae	Parvocalanus	Ciliophora	Intramacronucleata	Conthreep	Oligohymenophorea	Tetrahymena	?	270	38
ASV571	64	41	386	134	15	54	222	9	25	82.301	Arthropoda	Hexanauplia	Calanoida	Paracalanidae	Parvocalanus	Ascomycota	Dothideomycetes	Pleosporales	Didymosphaeriaceae	?	?	452	54
ASV1403	6	13	81	12	11	16	26	0	2	80.89	Arthropoda	Hexanauplia	Calanoida	Paracalanidae	Parvocalanus	Ascomycota	Dothideomycetes	Pleosporales	Didymosphaeriaceae	?	?	382	48
ASV2464	0	34	14	3	7	0	0	0	0	80.851	Arthropoda	Hexanauplia	Calanoida	Paracalanidae	Parvocalanus	Cryptomycota	?	?	?	?	?	470	59
ASV2497	0	0	0	56	0	0	0	0	0	80.761	Arthropoda	Hexanauplia	Calanoida	Paracalanidae	Parvocalanus	Protalveolata	Colpodellida	?	?	?	?	473	72
ASV963	0	0	362	0	0	0	0	0	0	80.462	Arthropoda	Hexanauplia	Calanoida	Paracalanidae	Parvocalanus	Phragmoplastophyta	Embryophyta	?	?	?	?	476	72
ASV2403	2	1	11	28	18	0	0	0	1	80.127	Arthropoda	Hexanauplia	Calanoida	Paracalanidae	Parvocalanus	Nucleariidae and Fonticula group	?	?	?	?	?	473	77
ASV11	7967	6094	87156	5700	641	1508	14251	1197	1709	80.084	Arthropoda	Hexanauplia	Calanoida	Paracalanidae	Parvocalanus	Gastrotricha	?	?	?	?	?	477	74
ASV1739	0	59	41	6	8	0	0	0	0	80.042	Arthropoda	Hexanauplia	Calanoida	Paracalanidae	Parvocalanus	Cryptomycota	?	?	?	?	?	471	65
ASV2021	0	0	18	0	0	0	9	20	39	79.707	Arthropoda	Hexanauplia	Calanoida	Paracalanidae	Parvocalanus	Protalveolata	Colpodellida	?	?	?	?	478	65
ASV1291	7	6	0	40	8	0	18	61	61	79.541	Arthropoda	Hexanauplia	Calanoida	Paracalanidae	Parvocalanus	Phragmoplastophyta	?	?	?	?	uncultured eukaryote	479	67
ASV1679	0	0	12	42	14	42	5	6	1	79.541	Arthropoda	Hexanauplia	Calanoida	Paracalanidae	Parvocalanus	Phragmoplastophyta	?	?	?	?	uncultured eukaryote	479	67
ASV66	0	0	0	12431	5831	10982	0	0	0	79.536	Arthropoda	Hexanauplia	Calanoida	Paracalanidae	Bestiolina	Phragmoplastophyta	Embryophyta	?	?	?	?	474	74
ASV1539	0	0	103	0	13	24	0	0	0	79.476	Arthropoda	Hexanauplia	Calanoida	Paracalanidae	Parvocalanus	Protalveolata	Perkinsidae	A31	?	?	?	458	74
ASV499	0	0	0	646	276	245	1	0	0	79.406	Arthropoda	Hexanauplia	Calanoida	Paracalanidae	Parvocalanus	?	?	?	?	?	?	471	70
ASV468	1	0	0	577	315	384	1	0	0	79.318	Arthropoda	Hexanauplia	Calanoida	Paracalanidae	Parvocalanus	?	Trebouxiophyceae	?	?	?	?	469	70
ASV2854	0	0	27	0	0	0	13	0	0	79.245	Arthropoda	Hexanauplia	Calanoida	Paracalanidae	Parvocalanus	Ascomycota	Dothideomycetes	Venturiales	Sympoventuriaceae	?	?	477	75
ASV769	6	1	0	4	2	546	2	0	0	79.245	Arthropoda	Hexanauplia	Calanoida	Paracalanidae	Parvocalanus	Phragmoplastophyta	Embryophyta	Brassicales	?	Brassica	Brassica oleracea	477	68
ASV2066	12	3	15	9	44	0	0	0	0	79.167	Arthropoda	Hexanauplia	Calanoida	Paracalanidae	Parvocalanus	Apusomonadidae	?	?	?	?	?	480	65
ASV377	1	0	0	966	376	425	0	0	0	79.149	Arthropoda	Hexanauplia	Calanoida	Paracalanidae	Parvocalanus	?	Trebouxiophyceae	?	?	?	?	470	71
ASV2142	38	10	30	0	0	0	0	0	0	79.149	Arthropoda	Hexanauplia	Calanoida	Paracalanidae	Bestiolina	Protalveolata	Perkinsidae	A31	?	?	?	470	74
ASV1007	0	0	0	59	112	160	0	0	0	79.14	Arthropoda	Hexanauplia	Calanoida	Paracalanidae	Parvocalanus	Phragmoplastophyta	Embryophyta	Liliopsida	?	?	?	465	60
ASV2016	0	0	0	0	6	0	62	12	6	79.07	Arthropoda	Hexanauplia	Calanoida	Paracalanidae	Parvocalanus	?	?	?	?	?	?	473	74
ASV164	0	0	0	2	0	6371	0	0	0	78.925	Arthropoda	Hexanauplia	Calanoida	Paracalanidae	Parvocalanus	Phragmoplastophyta	Embryophyta	Ericales	?	?	?	465	72
ASV1961	3	2	24	4	58	0	1	0	0	78.87	Arthropoda	Hexanauplia	Calanoida	Paracalanidae	Parvocalanus	Apusomonadidae	?	?	?	?	?	478	66
ASV1603	6	0	0	5	75	35	8	0	2	78.728	Arthropoda	Hexanauplia	Calanoida	Paracalanidae	Parvocalanus	Mucoromycota	Incertae Sedis	Endogonales	?	?	?	456	75
ASV877	0	2	11	104	195	92	35	3	1	78.706	Arthropoda	Hexanauplia	Calanoida	Paracalanidae	Parvocalanus	?	?	?	?	?	?	479	72
ASV125	210	49	61	983	5022	1531	1307	124	168	78.661	Arthropoda	Hexanauplia	Calanoida	Paracalanidae	Paracalanus	Gastrotricha	?	?	?	?	?	478	78
ASV632	0	7	14	130	466	133	35	0	0	78.647	Arthropoda	Hexanauplia	Calanoida	Paracalanidae	Parvocalanus	?	?	?	?	?	?	473	71
ASV1408	8	7	69	18	60	0	3	0	0	78.542	Arthropoda	Hexanauplia	Calanoida	Paracalanidae	Parvocalanus	Apusomonadidae	?	?	?	?	?	480	68
ASV2592	43	0	1	8	0	0	0	0	0	78.526	Arthropoda	Hexanauplia	Calanoida	Paracalanidae	Parvocalanus	?	Trebouxiophyceae	Incertae Sedis	?	Parachloroidium	Parachloroidium lobatum	475	72
ASV2522	0	0	25	23	2	0	0	3	2	78.481	Arthropoda	Hexanauplia	Calanoida	Paracalanidae	Parvocalanus	Ciliophora	Intramacronucleata	Conthreep	Colpodea	?	uncultured eukaryote	474	72
ASV2240	7	23	38	0	0	0	0	2	1	78.39	Arthropoda	Hexanauplia	Calanoida	Paracalanidae	Parvocalanus	Ciliophora	Intramacronucleata	Conthreep	Colpodea	?	uncultured eukaryote	472	72
ASV189	1	0	0	3677	213	1054	0	0	0	78.214	Arthropoda	Hexanauplia	Calanoida	Paracalanidae	Parvocalanus	?	Chlorophyceae	Chlamydomonadales	?	Chloromonas	Chloromonas perforata	459	78
ASV2125	8	6	25	23	17	0	0	0	0	78.105	Arthropoda	Hexanauplia	Calanoida	Paracalanidae	Parvocalanus	Cryptomycota	?	?	?	?	?	475	80
ASV2721	0	0	36	9	0	0	1	0	0	77.938	Arthropoda	Hexanauplia	Calanoida	Paracalanidae	Delibus	Schizoplasmodiida	?	?	?	?	?	485	78
ASV1307	20	19	5	19	92	28	8	1	2	77.386	Arthropoda	Hexanauplia	Calanoida	Paracalanidae	Parvocalanus	Apusomonadidae	?	?	?	?	?	482	73
ASV1759	6	7	16	15	4	7	37	11	9	100	Arthropoda	Hexanauplia	Calanoida	Pontellidae	Pontellina	Dinoflagellata	Dinophyceae	Gymnodiniphycidae	Suessiaceae	?	?	91	0
ASV1750	13	0	18	45	31	0	6	0	0	98.947	Arthropoda	Hexanauplia	Calanoida	Pontellidae	Pontellina	Cercozoa	?	?	?	?	?	95	0
ASV2602	0	7	44	0	0	0	0	0	0	98.901	Arthropoda	Hexanauplia	Calanoida	Pontellidae	Pontellina	Dinoflagellata	Dinophyceae	Gymnodiniphycidae	Suessiaceae	Symbiodinium	?	91	1
ASV2718	4	9	7	0	2	3	18	0	3	98.889	Arthropoda	Hexanauplia	Calanoida	Pontellidae	Pontellina							90	1
ASV1067	46	2	76	110	35	0	24	2	0	97.895	Arthropoda	Hexanauplia	Calanoida	Pontellidae	Pontellina	Cercozoa	Cercomonadidae	?	?	?	?	95	1
ASV2562	1	2	8	0	0	0	20	5	17	97.531	Arthropoda	Hexanauplia	Calanoida	Pontellidae	Pontellina	?	?	?	?	?	?	81	2
ASV2415	30	0	0	17	3	0	0	0	10	96.809	Arthropoda	Hexanauplia	Calanoida	Pontellidae	Pontellina	?	?	?	?	?	?	94	3
ASV2735	5	2	4	0	0	0	10	15	9	96.774	Arthropoda	Hexanauplia	Calanoida	Pontellidae	Pontellina	?	?	?	?	?	?	93	3
ASV2317	0	0	21	0	46	0	0	0	0	95.604	Arthropoda	Hexanauplia	Calanoida	Pontellidae	Pontellina	Cercozoa	?	?	?	?	?	91	4
ASV482	287	157	718	14	9	0	30	21	11	80.591	Arthropoda	Hexanauplia	Calanoida	Pontellidae	Labidocera	?	Ichthyosporea	Pseudoperkinsidae	?	Anurofeca	uncultured eukaryote	474	71
ASV764	127	64	355	0	0	0	0	12	9	80.38	Arthropoda	Hexanauplia	Calanoida	Pontellidae	Labidocera	?	Ichthyosporea	Pseudoperkinsidae	?	Anurofeca	uncultured eukaryote	474	72
ASV862	129	50	257	0	0	0	0	17	1	80.169	Arthropoda	Hexanauplia	Calanoida	Pontellidae	Labidocera	?	Ichthyosporea	Pseudoperkinsidae	?	Anurofeca	uncultured eukaryote	474	73
ASV2485	0	0	0	0	0	0	0	26	31	84.342	Arthropoda	Hexanauplia	Calanoida	Pseudocyclopidae	Pseudocyclops	Arthropoda	Maxillopoda	Calanoida	?	?	?	479	46
ASV1414	0	0	0	0	0	0	18	40	106	80.364	Arthropoda	Hexanauplia	Calanoida	Pseudocyclopidae	Pseudocyclops	?	?	?	?	?	?	275	42
ASV1826	0	0	29	0	0	0	15	9	52	79.873	Arthropoda	Hexanauplia	Calanoida	Pseudocyclopidae	Pseudocyclops	Ciliophora	Intramacronucleata	Conthreep	Prostomatea	Cryptocaryon	?	472	67
ASV1417	0	0	0	0	0	0	23	48	93	79.853	Arthropoda	Hexanauplia	Calanoida	Pseudocyclopidae	Pseudocyclops	?	?	?	?	?	?	273	43
ASV1098	0	0	79	5	3	43	31	37	83	79.787	Arthropoda	Hexanauplia	Calanoida	Pseudocyclopidae	Pseudocyclops	Ciliophora	Intramacronucleata	Conthreep	Prostomatea	Cryptocaryon	?	470	67
ASV2005	0	0	26	0	0	0	15	19	28	79.661	Arthropoda	Hexanauplia	Calanoida	Pseudocyclopidae	Pseudocyclops	Ciliophora	Intramacronucleata	Conthreep	Prostomatea	Cryptocaryon	?	472	68
ASV1014	0	0	0	0	0	0	52	68	207	79.636	Arthropoda	Hexanauplia	Calanoida	Pseudocyclopidae	Pseudocyclops	?	?	?	?	?	?	275	44
ASV2873	0	0	0	17	10	13	0	0	0	79.622	Arthropoda	Hexanauplia	Calanoida	Pseudocyclopidae	Pseudocyclops	Nucleariidae and Fonticula group	?	?	?	?	?	476	73
ASV2635	0	0	49	0	0	0	0	0	0	79.449	Arthropoda	Hexanauplia	Calanoida	Pseudocyclopidae	Pseudocyclops	Nucleariidae and Fonticula group	?	?	?	?	?	472	73
ASV2394	0	0	0	29	0	0	33	0	0	77.944	Arthropoda	Hexanauplia	Calanoida	Pseudocyclopidae	Pseudocyclops	Apicomplexa	Conoidasida	Gregarinasina	Archigregarinorida	?	?	467	91
ASV128	510	144	1419	1172	874	210	2436	1066	1331	77.386	Arthropoda	Hexanauplia	Calanoida	Pseudocyclopidae	Pseudocyclops	?	?	?	?	?	?	482	83
ASV142	0	75	0	6068	462	1173	104	0	0	76.261	Arthropoda	Hexanauplia	Calanoida	Pseudocyclopidae	Pseudocyclops	Ciliophora	Intramacronucleata	Armophorea	?	?	?	476	72
ASV1481	16	20	84	0	0	0	0	15	17	82.909	Arthropoda	Hexanauplia	Calanoida	Pseudodiaptomidae	Calanipeda	?	?	?	?	?	?	275	33
ASV1137	24	45	160	0	0	0	0	17	18	82.545	Arthropoda	Hexanauplia	Calanoida	Pseudodiaptomidae	Calanipeda	?	?	?	?	?	?	275	34
ASV1415	6	21	97	0	0	0	0	19	21	82.545	Arthropoda	Hexanauplia	Calanoida	Pseudodiaptomidae	Calanipeda	?	?	?	?	?	?	275	34
ASV1604	28	21	58	0	0	0	0	7	17	82.418	Arthropoda	Hexanauplia	Calanoida	Pseudodiaptomidae	Calanipeda	?	?	?	?	?	?	273	34
ASV1442	4	29	97	0	0	0	0	19	11	81.818	Arthropoda	Hexanauplia	Calanoida	Pseudodiaptomidae	Calanipeda	Dinoflagellata	Dinophyceae	?	?	?	?	275	36
ASV2647	0	29	0	0	0	0	8	6	6	79.622	Arthropoda	Hexanauplia	Calanoida	Ryocalanidae	Ryocalanus	Protalveolata	Perkinsidae	A31	?	?	?	476	69
ASV2382	3	0	60	0	0	0	0	0	0	90.476	Arthropoda	Hexanauplia	Calanoida	Scolecitrichidae	Scaphocalanus	?	?	?	?	?	?	84	8
ASV25	17856	11942	2102	10	0	0	13	18410	26751	85.201	Arthropoda	Hexanauplia	Calanoida	Spinocalanidae	Mimocalanus	Gastrotricha	?	?	?	?	?	473	55
ASV2801	0	0	0	7	5	31	0	0	0	79.707	Arthropoda	Hexanauplia	Calanoida	Spinocalanidae	Mospicalanus	Nucleariidae and Fonticula group	?	?	?	?	?	478	71
ASV1226	0	109	0	20	2	0	49	16	32	79.202	Arthropoda	Hexanauplia	Calanoida	Tharybidae	Tharybis	Protalveolata	Perkinsidae	A31	?	?	?	476	72
ASV2868	0	0	0	33	5	2	0	0	0	98.925	Arthropoda	Hexanauplia	Calanoida	Tortanidae	Tortanus							93	1
ASV1830	2	22	30	0	0	0	47	0	3	97.849	Arthropoda	Hexanauplia	Calanoida	Tortanidae	Tortanus	Protalveolata	?	?	?	?	?	93	2
ASV2156	0	34	0	0	0	0	3	18	23	81.743	Arthropoda	Hexanauplia	Calanoida	Tortanidae	Tortanus	?	?	?	?	?	?	241	39
ASV197	0	0	0	539	838	3390	3	0	0	82.418	Arthropoda	Hexanauplia	Calanoida			Arthropoda	Malacostraca	?	?	?	Panulirus ornatus	182	26
ASV2260	32	7	26	0	0	0	3	2	0	81.25	Arthropoda	Hexanauplia	Cyclopoida	Archinotodelphyidae	Archinotodelphys	Cryptomycota	Incertae Sedis	Incertae Sedis	?	?	?	272	43
ASV39	19596	9787	27080	0	0	0	0	0	0	87.361	Arthropoda	Hexanauplia	Cyclopoida	Botryllophilidae	Haplostoma	Chytridiomycota	Chytridiomycetes	Rhizophydiales	?	?	?	269	27
ASV1439	7	2	1	13	111	26	0	0	0	85.609	Arthropoda	Hexanauplia	Cyclopoida	Botryllophilidae	Haplostoma	Preaxostyla	?	?	?	?	?	271	28
ASV2333	5	5	22	19	0	0	14	1	0	85.446	Arthropoda	Hexanauplia	Cyclopoida	Botryllophilidae	Haplostoma	Zoopagomycota	Incertae Sedis	Harpellales	Legeriomycetaceae	Smittium	?	213	27
ASV1472	52	25	68	0	3	0	2	0	3	83.764	Arthropoda	Hexanauplia	Cyclopoida	Botryllophilidae	Haplostoma	Zoopagomycota	Incertae Sedis	Harpellales	Legeriomycetaceae	?	?	271	35
ASV1384	21	26	23	0	0	0	0	57	44	83.263	Arthropoda	Hexanauplia	Cyclopoida	Botryllophilidae	Haplostoma	Chytridiomycota	Chytridiomycetes	Rhizophydiales	?	?	?	472	55
ASV1862	16	30	19	0	0	0	0	17	19	82.839	Arthropoda	Hexanauplia	Cyclopoida	Botryllophilidae	Haplostoma	Chytridiomycota	Chytridiomycetes	Rhizophydiales	?	?	?	472	57
ASV2794	0	43	0	0	0	0	0	0	0	82.288	Arthropoda	Hexanauplia	Cyclopoida	Botryllophilidae	Haplostoma	Ciliophora	Intramacronucleata	Spirotrichea	Euplotia	?	?	271	34
ASV314	135	372	1623	0	0	0	74	36	64	82.143	Arthropoda	Hexanauplia	Cyclopoida	Botryllophilidae	Haplostoma	Aphelidea	?	?	?	?	?	476	57
ASV615	531	25	29	0	0	0	1	77	171	81.895	Arthropoda	Hexanauplia	Cyclopoida	Botryllophilidae	Haplostoma	Chytridiomycota	Chytridiomycetes	Rhizophydiales	?	?	uncultured Chytridiomycota	475	64
ASV106	1219	519	1157	3445	689	676	1984	567	981	81.818	Arthropoda	Hexanauplia	Cyclopoida	Botryllophilidae	Haplostoma	Chytridiomycota	Chytridiomycetes	Rhizophydiales	?	?	uncultured Chytridiomycota	473	64
ASV2435	0	0	0	0	0	59	0	0	0	81.684	Arthropoda	Hexanauplia	Cyclopoida	Botryllophilidae	Haplostoma	Chytridiomycota	Chytridiomycetes	?	?	?	?	475	64
ASV673	427	11	42	0	0	0	9	72	136	81.562	Arthropoda	Hexanauplia	Cyclopoida	Botryllophilidae	Haplostoma	Chytridiomycota	Chytridiomycetes	Rhizophydiales	?	?	uncultured Chytridiomycota	461	64
ASV2117	0	8	4	14	1	52	0	0	0	81.497	Arthropoda	Hexanauplia	Cyclopoida	Botryllophilidae	Haplostoma	Mucoromycota	Incertae Sedis	Endogonales	Endogonaceae	?	?	481	57
ASV318	8	878	1393	0	0	0	0	0	0	81.356	Arthropoda	Hexanauplia	Cyclopoida	Botryllophilidae	Haplostoma	Chytridiomycota	Chytridiomycetes	Rhizophydiales	?	?	?	472	67
ASV408	0	0	0	1441	37	65	0	0	0	81.224	Arthropoda	Hexanauplia	Cyclopoida	Botryllophilidae	Haplostoma	Chytridiomycota	Chytridiomycetes	?	?	?	?	474	65
ASV496	4	410	762	0	0	0	0	0	0	81.224	Arthropoda	Hexanauplia	Cyclopoida	Botryllophilidae	Haplostoma	Chytridiomycota	Chytridiomycetes	Rhizophydiales	?	?	?	474	68
ASV1700	9	0	58	1	0	11	3	6	31	81.184	Arthropoda	Hexanauplia	Cyclopoida	Botryllophilidae	Haplostoma	?	?	?	?	?	?	473	68
ASV622	6	342	462	0	0	0	0	0	0	81.184	Arthropoda	Hexanauplia	Cyclopoida	Botryllophilidae	Haplostoma	Chytridiomycota	Chytridiomycetes	Rhizophydiales	?	?	?	473	68
ASV578	0	0	0	164	142	111	237	110	156	81.053	Arthropoda	Hexanauplia	Cyclopoida	Botryllophilidae	Haplostoma	?	?	?	?	?	?	475	60
ASV967	0	0	0	183	146	31	0	0	0	81.053	Arthropoda	Hexanauplia	Cyclopoida	Botryllophilidae	Haplostoma	?	?	?	?	?	?	475	60
ASV2784	0	0	0	0	0	8	19	4	13	80.882	Arthropoda	Hexanauplia	Cyclopoida	Botryllophilidae	Haplostoma	?	?	?	?	?	?	476	65
ASV640	1	28	43	0	0	0	602	43	40	80.713	Arthropoda	Hexanauplia	Cyclopoida	Botryllophilidae	Haplostoma	Chytridiomycota	Chytridiomycetes	?	?	?	?	477	65
ASV175	1842	275	1611	792	193	304	457	107	102	80.544	Arthropoda	Hexanauplia	Cyclopoida	Botryllophilidae	Haplostoma	Phragmoplastophyta	?	?	?	?	?	478	60
ASV360	0	0	0	344	285	292	487	186	288	80.508	Arthropoda	Hexanauplia	Cyclopoida	Botryllophilidae	Haplostoma	?	?	?	?	?	?	472	62
ASV216	1466	240	1044	531	126	157	293	153	118	80.376	Arthropoda	Hexanauplia	Cyclopoida	Botryllophilidae	Haplostoma	Phragmoplastophyta	?	?	?	?	?	479	61
ASV599	0	0	0	108	118	166	224	123	139	80.338	Arthropoda	Hexanauplia	Cyclopoida	Botryllophilidae	Haplostoma	Aphelidea	?	?	?	?	?	473	63
ASV376	0	0	0	288	301	355	367	206	254	80.178	Arthropoda	Hexanauplia	Cyclopoida	Botryllophilidae	Haplostoma	?	?	?	?	?	?	449	59
ASV105	3069	696	3892	1284	282	458	1102	240	270	80.167	Arthropoda	Hexanauplia	Cyclopoida	Botryllophilidae	Haplostoma	Phragmoplastophyta	?	?	?	?	?	479	62
ASV476	0	0	12	258	725	263	0	0	0	80.126	Arthropoda	Hexanauplia	Cyclopoida	Botryllophilidae	Haplostoma	?	?	?	?	?	?	478	60
ASV1024	1	0	0	290	5	22	0	0	0	79.916	Arthropoda	Hexanauplia	Cyclopoida	Botryllophilidae	Haplostoma	?	?	?	?	?	?	478	64
ASV102	128	36	79	6390	1102	2378	930	518	855	79.749	Arthropoda	Hexanauplia	Cyclopoida	Botryllophilidae	Haplostoma	?	Chlorophyceae	Chlamydomonadales	?	Chloromonas	Chloromonas perforata	479	63
ASV603	0	0	0	132	570	162	0	0	0	79.741	Arthropoda	Hexanauplia	Cyclopoida	Botryllophilidae	Haplostoma	Chytridiomycota	Chytridiomycetes	?	?	?	?	464	59
ASV2241	32	8	31	0	0	0	0	0	0	79.701	Arthropoda	Hexanauplia	Cyclopoida	Botryllophilidae	Haplostoma	Cryptomycota	Incertae Sedis	Incertae Sedis	Incertae Sedis	Paramicrosporidium	uncultured eukaryote	468	61
ASV719	0	0	0	139	385	99	0	0	0	79.526	Arthropoda	Hexanauplia	Cyclopoida	Botryllophilidae	Haplostoma	Chytridiomycota	Chytridiomycetes	?	?	?	?	464	60
ASV459	25	1102	138	0	0	0	8	16	29	79.487	Arthropoda	Hexanauplia	Cyclopoida	Botryllophilidae	Haplostoma	Cryptomycota	Incertae Sedis	Incertae Sedis	Incertae Sedis	Paramicrosporidium	?	468	69
ASV2621	0	0	7	0	6	36	1	0	0	79.418	Arthropoda	Hexanauplia	Cyclopoida	Botryllophilidae	Haplostoma	?	?	?	?	?	?	481	63
ASV593	12	747	74	0	0	0	14	15	26	79.318	Arthropoda	Hexanauplia	Cyclopoida	Botryllophilidae	Haplostoma	Cryptomycota	Incertae Sedis	Incertae Sedis	Incertae Sedis	Paramicrosporidium	?	469	70
ASV2775	0	7	4	10	0	0	15	6	2	79.237	Arthropoda	Hexanauplia	Cyclopoida	Botryllophilidae	Haplostoma	?	?	?	?	?	?	472	74
ASV320	7	1861	240	0	0	0	45	27	76	79.104	Arthropoda	Hexanauplia	Cyclopoida	Botryllophilidae	Haplostoma	Cryptomycota	Incertae Sedis	Incertae Sedis	Incertae Sedis	Paramicrosporidium	?	469	70
ASV250	37	5	41	1670	1031	545	11	0	0	79.06	Arthropoda	Hexanauplia	Cyclopoida	Botryllophilidae	Haplostoma	Cryptomycota	Incertae Sedis	Incertae Sedis	Incertae Sedis	Paramicrosporidium	uncultured eukaryote	468	65
ASV2401	22	12	3	25	0	0	0	0	0	79.036	Arthropoda	Hexanauplia	Cyclopoida	Botryllophilidae	Haplostoma	Mucoromycota	Incertae Sedis	Umbelopsidales	Umbelopsidaceae	Umbelopsis	Umbelopsis ramanniana	477	76
ASV2717	2	8	0	36	0	0	0	0	0	79.025	Arthropoda	Hexanauplia	Cyclopoida	Botryllophilidae	Haplostoma	Mucoromycota	Incertae Sedis	Umbelopsidales	Umbelopsidaceae	Umbelopsis	Umbelopsis ramanniana	472	81
ASV383	35	5	19	943	475	235	6	0	0	78.97	Arthropoda	Hexanauplia	Cyclopoida	Botryllophilidae	Haplostoma	Cryptomycota	Incertae Sedis	Incertae Sedis	Incertae Sedis	Paramicrosporidium	uncultured eukaryote	466	65
ASV2679	0	5	13	9	0	0	0	19	1	78.737	Arthropoda	Hexanauplia	Cyclopoida	Botryllophilidae	Haplostoma	?	?	?	?	?	?	475	74
ASV2075	0	0	47	0	0	0	0	15	21	78.484	Arthropoda	Hexanauplia	Cyclopoida	Botryllophilidae	Haplostoma	Centrohelida	?	?	?	?	?	488	65
ASV2279	3	0	0	12	0	0	2	29	23	77.802	Arthropoda	Hexanauplia	Cyclopoida	Botryllophilidae	Haplostoma	?	?	?	?	?	?	464	73
ASV2018	26	0	9	13	29	0	0	0	9	77.053	Arthropoda	Hexanauplia	Cyclopoida	Botryllophilidae	Haplostoma	?	Chlorophyceae	?	?	?	uncultured Oedogoniales	475	74
ASV2261	36	0	5	6	23	0	0	0	0	76.632	Arthropoda	Hexanauplia	Cyclopoida	Botryllophilidae	Haplostoma	?	?	?	?	?	?	475	80
ASV2105	0	0	0	12	4	64	0	0	0	81.092	Arthropoda	Hexanauplia	Cyclopoida	Cyclopettidae	Paracyclopina	Aphelidea	?	?	?	?	?	476	66
ASV1299	0	0	0	0	0	197	0	0	0	99.733	Arthropoda	Hexanauplia	Cyclopoida	Cyclopidae	Macrocyclops	Arthropoda	Maxillopoda	Cyclopoida	?	?	Macrocyclops albidus	374	1
ASV1867	0	0	0	0	0	101	0	0	0	99.654	Arthropoda	Hexanauplia	Cyclopoida	Cyclopidae	Macrocyclops	Arthropoda	Maxillopoda	Cyclopoida	?	?	Macrocyclops albidus	289	1
ASV1496	0	0	0	2	0	146	0	0	0	99.632	Arthropoda	Hexanauplia	Cyclopoida	Cyclopidae	Macrocyclops	Arthropoda	Maxillopoda	Cyclopoida	?	?	Macrocyclops albidus	272	1
ASV29	11413	26684	15638	0	0	0	61	6068	8408	99.627	Arthropoda	Hexanauplia	Cyclopoida	Cyclopidae	Mesocyclops	?	?	?	?	?	?	268	1
ASV2744	11	3	2	3	0	7	0	8	11	99.567	Arthropoda	Hexanauplia	Cyclopoida	Cyclopidae	Mesocyclops	Arthropoda	Maxillopoda	Cyclopoida	?	?	?	231	1
ASV1197	0	0	2	49	0	190	0	0	0	99.461	Arthropoda	Hexanauplia	Cyclopoida	Cyclopidae	Ectocyclops	Arthropoda	Maxillopoda	Cyclopoida	?	?	Ectocyclops affinis	371	2
ASV1692	0	0	0	2	0	119	0	0	0	99.346	Arthropoda	Hexanauplia	Cyclopoida	Cyclopidae	Macrocyclops	Arthropoda	Maxillopoda	Cyclopoida	?	?	Macrocyclops albidus	306	2
ASV1366	0	0	0	51	0	123	0	0	0	99.293	Arthropoda	Hexanauplia	Cyclopoida	Cyclopidae	Ectocyclops	Arthropoda	Maxillopoda	Cyclopoida	?	?	Ectocyclops affinis	283	2
ASV650	1	0	0	231	0	502	0	0	0	99.017	Arthropoda	Hexanauplia	Cyclopoida	Cyclopidae	Ectocyclops	Arthropoda	Maxillopoda	Cyclopoida	?	?	?	407	4
ASV815	8	5	3	3	0	7	0	200	282	99	Arthropoda	Hexanauplia	Cyclopoida	Cyclopidae	Mesocyclops	Arthropoda	Maxillopoda	Cyclopoida	?	?	?	200	2
ASV1391	19	11	2	4	5	28	0	44	57	98.977	Arthropoda	Hexanauplia	Cyclopoida	Cyclopidae	Mesocyclops	Arthropoda	Maxillopoda	Cyclopoida	?	?	Mesocyclops pehpeiensis	391	4
ASV2186	4	3	0	2	0	22	0	24	20	98.945	Arthropoda	Hexanauplia	Cyclopoida	Cyclopidae	Mesocyclops	Arthropoda	Maxillopoda	Cyclopoida	?	?	Mesocyclops pehpeiensis	379	4
ASV1515	16	7	2	4	2	45	0	28	41	98.939	Arthropoda	Hexanauplia	Cyclopoida	Cyclopidae	Mesocyclops	Arthropoda	Maxillopoda	Cyclopoida	?	?	Mesocyclops pehpeiensis	377	4
ASV668	78	4	186	301	0	135	0	0	0	98.932	Arthropoda	Hexanauplia	Cyclopoida	Cyclopidae	Ectocyclops	Arthropoda	Maxillopoda	Cyclopoida	?	?	Ectocyclops affinis	468	5
ASV1694	0	0	0	29	0	91	0	0	0	98.91	Arthropoda	Hexanauplia	Cyclopoida	Cyclopidae	Ectocyclops	Arthropoda	Maxillopoda	Cyclopoida	?	?	?	367	4
ASV1501	0	0	0	65	0	83	0	0	0	98.827	Arthropoda	Hexanauplia	Cyclopoida	Cyclopidae	Ectocyclops	Arthropoda	Maxillopoda	Cyclopoida	?	?	?	341	4
ASV669	0	0	0	185	0	517	0	0	0	98.826	Arthropoda	Hexanauplia	Cyclopoida	Cyclopidae	Ectocyclops	Arthropoda	Maxillopoda	Cyclopoida	?	?	?	426	5
ASV1993	0	0	0	19	0	70	0	0	0	98.776	Arthropoda	Hexanauplia	Cyclopoida	Cyclopidae	Ectocyclops	Arthropoda	Maxillopoda	Cyclopoida	?	?	Ectocyclops affinis	245	3
ASV1325	12	12	5	4	1	22	0	43	90	98.756	Arthropoda	Hexanauplia	Cyclopoida	Cyclopidae	Mesocyclops	Arthropoda	Maxillopoda	Cyclopoida	?	?	?	402	5
ASV45	8030	1846	1261	1845	336	4213	15	15493	18825	98.715	Arthropoda	Hexanauplia	Cyclopoida	Cyclopidae	Mesocyclops	Arthropoda	Maxillopoda	Cyclopoida	?	?	?	467	6
ASV2062	6	3	2	2	0	14	0	20	37	98.674	Arthropoda	Hexanauplia	Cyclopoida	Cyclopidae	Mesocyclops	Arthropoda	Maxillopoda	Cyclopoida	?	?	?	377	5
ASV1655	13	0	4	3	0	33	0	16	56	98.626	Arthropoda	Hexanauplia	Cyclopoida	Cyclopidae	Mesocyclops	Arthropoda	Maxillopoda	Cyclopoida	?	?	?	364	5
ASV1495	4	0	0	66	0	79	0	0	0	98.522	Arthropoda	Hexanauplia	Cyclopoida	Cyclopidae	Ectocyclops	Arthropoda	Maxillopoda	Cyclopoida	?	?	?	406	6
ASV10	18357	6253	4485	5852	1018	11894	37	32732	47417	98.511	Arthropoda	Hexanauplia	Cyclopoida	Cyclopidae	Mesocyclops	Arthropoda	Maxillopoda	Cyclopoida	?	?	?	470	7
ASV1590	13	5	1	5	0	29	0	25	55	98.507	Arthropoda	Hexanauplia	Cyclopoida	Cyclopidae	Mesocyclops	Arthropoda	Maxillopoda	Cyclopoida	?	?	Mesocyclops pehpeiensis	335	5
ASV46	0	2	0	25016	19	25949	0	0	0	98.501	Arthropoda	Hexanauplia	Cyclopoida	Cyclopidae	Ectocyclops	Arthropoda	Maxillopoda	Cyclopoida	?	?	?	467	7
ASV7	157	25	280	47423	105	91076	0	26	41	98.498	Arthropoda	Hexanauplia	Cyclopoida	Cyclopidae	Macrocyclops	Arthropoda	Maxillopoda	Cyclopoida	?	?	Macrocyclops albidus	466	7
ASV16	15090	3885	2329	3737	820	9423	24	29240	34624	98.498	Arthropoda	Hexanauplia	Cyclopoida	Cyclopidae	Mesocyclops	Arthropoda	Maxillopoda	Cyclopoida	?	?	?	466	7
ASV2710	3	0	4	2	0	12	0	13	12	98.457	Arthropoda	Hexanauplia	Cyclopoida	Cyclopidae	Mesocyclops	Arthropoda	Maxillopoda	Cyclopoida	?	?	Mesocyclops pehpeiensis	324	5
ASV15	1	0	0	32791	37	75286	0	0	0	98.073	Arthropoda	Hexanauplia	Cyclopoida	Cyclopidae	Ectocyclops	Arthropoda	Maxillopoda	Cyclopoida	?	?	?	467	9
ASV1719	14	0	4	1	0	21	0	33	43	98.072	Arthropoda	Hexanauplia	Cyclopoida	Cyclopidae	Mesocyclops	Arthropoda	Maxillopoda	Cyclopoida	?	?	?	363	7
ASV1853	0	5	0	4	16	77	0	0	0	97.863	Arthropoda	Hexanauplia	Cyclopoida	Cyclopidae	Eucyclops	Arthropoda	Maxillopoda	Cyclopoida	?	?	?	468	10
ASV472	3	0	0	248	0	704	0	106	211	97.763	Arthropoda	Hexanauplia	Cyclopoida	Cyclopidae	Macrocyclops	Arthropoda	Maxillopoda	Cyclopoida	?	?	Macrocyclops albidus	447	10
ASV1535	0	0	0	38	0	64	1	9	29	97.475	Arthropoda	Hexanauplia	Cyclopoida	Cyclopidae	Paracyclops	?	?	?	?	?	?	396	10
ASV67	67	1	61	7119	24	9603	23	5417	6870	97.425	Arthropoda	Hexanauplia	Cyclopoida	Cyclopidae	Paracyclops	?	?	?	?	?	?	466	12
ASV1646	28	1	28	51	5	0	13	0	0	97.407	Arthropoda	Hexanauplia	Cyclopoida	Cyclopidae	Eucyclops	Arthropoda	Maxillopoda	Cyclopoida	?	?	?	270	7
ASV1682	0	0	0	12	0	61	0	25	24	97.29	Arthropoda	Hexanauplia	Cyclopoida	Cyclopidae	Paracyclops	?	?	?	?	?	?	369	10
ASV82	64	2	48	4580	25	5746	24	3992	4661	96.795	Arthropoda	Hexanauplia	Cyclopoida	Cyclopidae	Paracyclops	?	?	?	?	?	?	468	15
ASV2059	2	0	0	0	1	0	64	11	6	96.774	Arthropoda	Hexanauplia	Cyclopoida	Cyclopidae	Euryte							93	3
ASV2262	34	0	36	0	0	0	0	0	0	95.181	Arthropoda	Hexanauplia	Cyclopoida	Cyclopidae	Acanthocyclops	Cercozoa	Vampyrellidae	?	?	?	?	83	4
ASV90	0	0	13	0	0	0	10670	2485	3459	94.834	Arthropoda	Hexanauplia	Cyclopoida	Cyclopidae	Mesocyclops	Platyhelminthes	Rhabditophora	Rhabdocoela	?	?	?	271	8
ASV283	0	0	3	882	0	1994	0	0	0	94.576	Arthropoda	Hexanauplia	Cyclopoida	Cyclopidae	Eucyclops	Arthropoda	Malacostraca	?	?	?	?	295	12
ASV2439	0	9	2	18	0	14	11	0	5	94.444	Arthropoda	Hexanauplia	Cyclopoida	Cyclopidae	Acanthocyclops	?	?	?	?	?	?	90	5
ASV2273	8	11	33	0	7	0	0	3	7	93.976	Arthropoda	Hexanauplia	Cyclopoida	Cyclopidae	Acanthocyclops	Cercozoa	Vampyrellidae	?	?	?	?	83	5
ASV14	9508	9918	4972	37805	4054	18654	9220	7647	10522	93.235	Arthropoda	Hexanauplia	Cyclopoida	Cyclopidae	Mesocyclops	Arthropoda	Maxillopoda	Cyclopoida	?	?	?	473	28
ASV2	95610	49273	8232	31	1	0	58	65491	110167	93.148	Arthropoda	Hexanauplia	Cyclopoida	Cyclopidae	Mesocyclops	Arthropoda	Maxillopoda	Cyclopoida	?	?	?	467	30
ASV2552	31	5	5	8	5	0	0	0	0	91.912	Arthropoda	Hexanauplia	Cyclopoida	Cyclopidae	Mesocyclops	Cercozoa	Glissomonadida	?	?	?	?	272	15
ASV394	0	0	5	965	152	520	0	3	6	89.668	Arthropoda	Hexanauplia	Cyclopoida	Cyclopidae	Diacyclops	Phragmoplastophyta	?	?	?	?	?	271	21
ASV2537	6	2	21	19	7	0	0	0	0	88.723	Arthropoda	Hexanauplia	Cyclopoida	Cyclopidae	Eucyclops	Arthropoda	Ellipura	Collembola	?	?	?	470	42
ASV1517	0	10	8	26	20	80	1	0	0	88.26	Arthropoda	Hexanauplia	Cyclopoida	Cyclopidae	Ectocyclops	Ascomycota	Dothideomycetes	?	?	?	?	477	35
ASV2520	0	0	0	20	0	32	0	2	1	86.737	Arthropoda	Hexanauplia	Cyclopoida	Cyclopidae	Ectocyclops	Phragmoplastophyta	?	?	?	?	?	475	44
ASV298	0	0	1262	0	0	0	0	522	807	86.637	Arthropoda	Hexanauplia	Cyclopoida	Cyclopidae	Thermocyclops	Rotifera	Monogononta	Ploimida	?	?	?	449	46
ASV569	0	0	56	184	0	208	298	100	108	85.745	Arthropoda	Hexanauplia	Cyclopoida	Cyclopidae	Eucyclops	Rotifera	Monogononta	Ploimida	?	?	?	470	55
ASV1538	0	17	114	0	0	0	9	0	0	85.43	Arthropoda	Hexanauplia	Cyclopoida	Cyclopidae	Diacyclops	?	?	?	?	?	?	151	18
ASV2804	35	0	7	0	0	0	0	0	0	82.468	Arthropoda	Hexanauplia	Cyclopoida	Cyclopidae	Diacyclops	?	?	?	?	?	?	154	27
ASV2423	0	0	0	13	19	28	0	0	0	82.407	Arthropoda	Hexanauplia	Cyclopoida	Cyclopidae	Diacyclops	Prymnesiophyceae	?	?	?	?	?	216	34
ASV2605	0	0	0	0	0	0	0	24	27	81.618	Arthropoda	Hexanauplia	Cyclopoida	Cyclopidae	Macrocyclops	Ciliophora	Intramacronucleata	Conthreep	Oligohymenophorea	?	?	272	38
ASV2723	0	45	0	0	0	0	0	0	1	80.292	Arthropoda	Hexanauplia	Cyclopoida	Cyclopidae	Diacyclops	LKM15	?	?	?	?	?	274	40
ASV2892	1	0	0	11	27	0	0	0	0	78.079	Arthropoda	Hexanauplia	Cyclopoida	Cyclopidae	Microcyclops	Ciliophora	Intramacronucleata	Conthreep	Oligohymenophorea	Protocyclidium	?	479	73
ASV1310	6	0	3	0	0	0	59	36	90	77.848	Arthropoda	Hexanauplia	Cyclopoida	Cyclopidae	Macrocyclops	Ciliophora	Intramacronucleata	Conthreep	Oligohymenophorea	Protocyclidium	?	474	86
ASV907	3	10	251	0	0	0	1	56	89	75.681	Arthropoda	Hexanauplia	Cyclopoida	Cyclopidae	Apocyclops	Dinoflagellata	Dinophyceae	Peridiniales	?	?	?	477	94
ASV525	196	135	355	0	0	0	187	94	119	98.611	Arthropoda	Hexanauplia	Cyclopoida	Cyclopinidae	Cyclopicina							72	1
ASV584	176	125	233	0	0	0	115	121	138	97.619	Arthropoda	Hexanauplia	Cyclopoida	Cyclopinidae	Cyclopicina							84	2
ASV2177	0	76	0	0	0	0	0	0	0	94.048	Arthropoda	Hexanauplia	Cyclopoida	Cyclopinidae	Cyclopicina							84	5
ASV2738	0	0	0	0	0	0	44	1	0	82.394	Arthropoda	Hexanauplia	Cyclopoida	Cyclopinidae	Cyclopicina	Chytridiomycota	?	?	?	?	?	284	33
ASV2287	0	0	0	0	0	0	68	0	0	79.661	Arthropoda	Hexanauplia	Cyclopoida	Cyclopinidae	Cyclopicina	Chytridiomycota	?	?	?	?	?	472	82
ASV237	0	7	54	1107	1088	1358	52	0	4	78.316	Arthropoda	Hexanauplia	Cyclopoida	Cyclopinidae	Cyclopicina	Ciliophora	Intramacronucleata	Conthreep	Oligohymenophorea	Protocyclidium	metagenome	475	76
ASV289	0	3	49	895	868	889	36	0	8	77.895	Arthropoda	Hexanauplia	Cyclopoida	Cyclopinidae	Cyclopicina	Ciliophora	Intramacronucleata	Conthreep	Oligohymenophorea	Protocyclidium	metagenome	475	78
ASV108	444	134	1075	1848	1957	2207	295	1299	1826	77.731	Arthropoda	Hexanauplia	Cyclopoida	Cyclopinidae	Cyclopicina	Ciliophora	Intramacronucleata	Conthreep	Oligohymenophorea	Protocyclidium	metagenome	476	79
ASV2489	0	0	6	12	1	0	0	14	24	78.891	Arthropoda	Hexanauplia	Cyclopoida	Cyclopoida incertae sedis	Pachos	Protalveolata	Perkinsidae	A31	?	?	?	469	82
ASV2642	5	16	13	0	0	0	15	0	0	88.535	Arthropoda	Hexanauplia	Cyclopoida	Oithonidae	Oithona							157	18
ASV2751	4	2	5	0	0	0	0	17	17	84.058	Arthropoda	Hexanauplia	Cyclopoida	Oithonidae	Oithona	Chytridiomycota	?	?	?	?	?	276	36
ASV2539	38	14	2	0	0	0	0	0	0	81.237	Arthropoda	Hexanauplia	Cyclopoida	Oithonidae	Oithona	Aphelidea	?	?	?	?	?	469	78
ASV2311	0	61	0	0	0	0	2	1	3	80.973	Arthropoda	Hexanauplia	Cyclopoida	Oithonidae	Oithona	?	?	?	?	?	?	473	77
ASV2771	10	2	12	0	0	0	8	3	9	80.761	Arthropoda	Hexanauplia	Cyclopoida	Oithonidae	Oithona	?	Choanoflagellida	Codonosigidae	?	Monosiga	?	473	78
ASV1836	8	20	25	0	0	0	21	18	12	80.679	Arthropoda	Hexanauplia	Cyclopoida	Oithonidae	Oithona	?	Choanoflagellida	Codonosigidae	?	Monosiga	?	471	76
ASV1066	1	12	78	0	0	0	39	71	94	80.591	Arthropoda	Hexanauplia	Cyclopoida	Oithonidae	Oithona	?	Choanoflagellida	Codonosigidae	?	Monosiga	Monosiga ovata	474	77
ASV1551	0	5	20	34	42	18	10	6	3	80.508	Arthropoda	Hexanauplia	Cyclopoida	Oithonidae	Oithona	?	Choanoflagellida	Codonosigidae	?	Monosiga	Monosiga ovata	472	80
ASV1170	9	10	68	0	0	0	33	49	83	79.958	Arthropoda	Hexanauplia	Cyclopoida	Oithonidae	Oithona	?	Choanoflagellida	Codonosigidae	?	Monosiga	?	474	76
ASV1828	15	6	41	31	12	0	0	0	0	78.769	Arthropoda	Hexanauplia	Cyclopoida	Oithonidae	Oithona	Cryptomycota	?	?	?	?	?	471	78
ASV1685	9	3	56	36	17	0	0	0	0	78.647	Arthropoda	Hexanauplia	Cyclopoida	Oithonidae	Oithona	Cryptomycota	?	?	?	?	?	473	79
ASV1400	19	6	57	59	26	0	0	0	0	78.436	Arthropoda	Hexanauplia	Cyclopoida	Oithonidae	Oithona	Cryptomycota	?	?	?	?	?	473	80
ASV2712	31	0	2	0	0	0	13	0	0	77.263	Arthropoda	Hexanauplia	Cyclopoida	Oithonidae	Oithona	?	?	?	?	?	?	475	89
ASV1456	112	30	14	0	0	0	0	0	0	81.646	Arthropoda	Hexanauplia	Cyclopoida	Psammocyclopinidae	Metacyclopina	Aphelidea	?	?	?	?	?	474	72
ASV2064	64	14	5	0	0	0	0	0	0	81.435	Arthropoda	Hexanauplia	Cyclopoida	Psammocyclopinidae	Metacyclopina	Aphelidea	?	?	?	?	?	474	73
ASV2426	35	22	3	0	0	0	0	0	0	81.224	Arthropoda	Hexanauplia	Cyclopoida	Psammocyclopinidae	Metacyclopina	Aphelidea	?	?	?	?	?	474	74
ASV2673	0	0	0	15	8	23	1	0	0	79.661	Arthropoda	Hexanauplia	Cyclopoida	Pterinopsyllidae	Pterinopsyllus	Ciliophora	Intramacronucleata	Conthreep	Prostomatea	Cryptocaryon	uncultured microeukaryote	472	70
ASV1723	1	109	5	0	0	0	1	0	0	77.215	Arthropoda	Hexanauplia	Cyclopoida	Rhynchomolgidae	Doridicola	Apicomplexa	Conoidasida	Gregarinasina	?	?	?	474	77
ASV524	112	126	0	180	145	515	0	9	0	78.132	Arthropoda	Hexanauplia	Cyclopoida	Sabelliphilidae	Sabelliphilus	Ciliophora	Intramacronucleata	Conthreep	Phyllopharyngea	Chilodonella	Chilodonella piscicola	471	65
ASV641	74	85	0	140	109	334	0	9	6	77.516	Arthropoda	Hexanauplia	Cyclopoida	Sabelliphilidae	Sabelliphilus	Ciliophora	Intramacronucleata	Conthreep	Phyllopharyngea	Chilodonella	Chilodonella piscicola	467	71
ASV401	139	126	0	321	289	704	0	7	0	77.419	Arthropoda	Hexanauplia	Cyclopoida	Sabelliphilidae	Sabelliphilus	Ciliophora	Intramacronucleata	Conthreep	Phyllopharyngea	Chilodonella	Chilodonella piscicola	465	71
ASV52	188	5	207	9620	60	13074	35	7898	11619	83.229	Arthropoda	Hexanauplia	Cyclopoida	Schminkepinellidae	Cyclopinella	Gastrotricha	?	?	?	?	?	477	65
ASV2116	0	1	0	76	2	0	0	0	0	81.985	Arthropoda	Hexanauplia	Cyclopoida	Schminkepinellidae	Cyclopinella	Apicomplexa	Conoidasida	Gregarinasina	Eugregarinorida	Elev-18S-1089	?	272	39
ASV1978	0	0	0	74	5	11	0	0	0	81.919	Arthropoda	Hexanauplia	Cyclopoida	Schminkepinellidae	Cyclopinella	Apicomplexa	Conoidasida	Gregarinasina	Eugregarinorida	?	?	271	41
ASV1958	0	0	0	79	7	6	0	0	0	81.784	Arthropoda	Hexanauplia	Cyclopoida	Schminkepinellidae	Cyclopinella	Apicomplexa	Conoidasida	Gregarinasina	Eugregarinorida	?	?	269	41
ASV2226	0	30	16	11	0	5	0	2	8	81.716	Arthropoda	Hexanauplia	Cyclopoida	Schminkepinellidae	Cyclopinella	Apicomplexa	Conoidasida	Gregarinasina	Eugregarinorida	Elev-18S-1089	?	268	43
ASV2793	0	6	3	24	0	3	0	3	4	81.716	Arthropoda	Hexanauplia	Cyclopoida	Schminkepinellidae	Cyclopinella	Apicomplexa	Conoidasida	Gregarinasina	Eugregarinorida	Elev-18S-1089	?	268	43
ASV1459	0	3	13	115	11	0	6	6	1	81.481	Arthropoda	Hexanauplia	Cyclopoida	Schminkepinellidae	Cyclopinella	Apicomplexa	Conoidasida	Gregarinasina	Eugregarinorida	Elev-18S-1089	?	270	40
ASV1578	0	43	41	28	0	11	0	4	8	81.481	Arthropoda	Hexanauplia	Cyclopoida	Schminkepinellidae	Cyclopinella	Apicomplexa	Conoidasida	Gregarinasina	Eugregarinorida	Elev-18S-1089	?	270	44
ASV1275	28	102	46	17	10	0	0	0	4	80.085	Arthropoda	Hexanauplia	Cyclopoida	Schminkepinellidae	Cyclopinella	LKM15	?	?	?	?	?	472	78
ASV809	18	245	184	28	23	0	0	15	7	79.661	Arthropoda	Hexanauplia	Cyclopoida	Schminkepinellidae	Cyclopinella	LKM15	?	?	?	?	?	472	80
ASV1549	0	0	0	58	63	13	3	0	1	79.368	Arthropoda	Hexanauplia	Cyclopoida	Schminkepinellidae	Cyclopinella	Ciliophora	Intramacronucleata	Conthreep	Colpodea	?	?	475	64
ASV296	61	356	2072	0	0	0	36	30	54	80.802	Arthropoda	Hexanauplia	Cyclopoida	Smirnovipinidae		Ascomycota	Dothideomycetes	Pleosporales	?	?	?	474	68
ASV291	0	42	50	771	777	1078	1	6	10	98.901	Chordata	Teleostei	Atheriniformes	Pseudomugilidae	Pseudomugil	Cercozoa	?	?	?	?	?	91	1
ASV759	18	79	28	110	191	141	6	0	0	98.901	Chordata	Teleostei	Atheriniformes	Pseudomugilidae	Pseudomugil	Cercozoa	Glissomonadida	?	?	?	?	91	1
ASV1026	23	4	34	40	55	110	36	13	2	98.901	Chordata	Teleostei	Atheriniformes	Pseudomugilidae	Pseudomugil	Cercozoa	Glissomonadida	?	?	?	?	91	1
ASV1147	50	2	5	0	6	0	79	48	71	98.901	Chordata	Teleostei	Atheriniformes	Pseudomugilidae	Pseudomugil	Cercozoa	Cercomonadidae	?	?	?	?	91	1
ASV1795	13	20	75	0	0	0	0	0	0	98.901	Chordata	Teleostei	Atheriniformes	Pseudomugilidae	Pseudomugil	Cercozoa	Glissomonadida	?	?	?	?	91	1
ASV1926	7	0	9	10	31	22	0	6	10	98.901	Chordata	Teleostei	Atheriniformes	Pseudomugilidae	Pseudomugil	Cercozoa	Glissomonadida	?	?	?	?	91	1
ASV2516	0	1	19	0	3	29	3	0	0	98.901	Chordata	Teleostei	Atheriniformes	Pseudomugilidae	Pseudomugil	Cercozoa	?	?	?	?	?	91	1
ASV491	0	0	0	430	320	452	0	0	0	98.734	Chordata	Teleostei	Atheriniformes	Pseudomugilidae	Pseudomugil	Cercozoa	?	?	?	?	?	79	1
ASV933	2	4	0	99	233	50	0	0	0	98.734	Chordata	Teleostei	Atheriniformes	Pseudomugilidae	Pseudomugil	Cercozoa	Glissomonadida	?	?	?	?	79	1
ASV1752	2	0	6	23	31	26	0	10	14	98.734	Chordata	Teleostei	Atheriniformes	Pseudomugilidae	Pseudomugil	Cercozoa	Glissomonadida	?	?	?	?	79	1
ASV1049	61	5	2	2	5	0	59	69	100	98.718	Chordata	Teleostei	Atheriniformes	Pseudomugilidae	Pseudomugil	Cercozoa	Cercomonadidae	?	?	?	uncultured Cercozoa	78	1
ASV129	883	485	1196	1047	2453	1109	1441	213	335	97.802	Chordata	Teleostei	Atheriniformes	Pseudomugilidae	Pseudomugil	Cercozoa	Glissomonadida	?	?	?	?	91	2
ASV440	0	17	29	449	437	476	0	5	4	97.802	Chordata	Teleostei	Atheriniformes	Pseudomugilidae	Pseudomugil	Cercozoa	?	?	?	?	?	91	2
ASV734	1	4	20	0	0	0	491	50	43	97.802	Chordata	Teleostei	Atheriniformes	Pseudomugilidae	Pseudomugil	Cercozoa	Incertae Sedis	?	?	?	?	91	2
ASV746	24	71	33	93	182	189	4	0	0	97.802	Chordata	Teleostei	Atheriniformes	Pseudomugilidae	Pseudomugil	Cercozoa	?	?	?	?	?	91	2
ASV820	9	66	23	120	158	123	3	0	1	97.802	Chordata	Teleostei	Atheriniformes	Pseudomugilidae	Pseudomugil	Cercozoa	Glissomonadida	?	?	?	?	91	2
ASV931	0	4	0	95	260	30	0	0	0	97.802	Chordata	Teleostei	Atheriniformes	Pseudomugilidae	Pseudomugil	Cercozoa	Glissomonadida	?	?	?	?	91	2
ASV1427	12	7	15	28	30	58	8	3	0	97.802	Chordata	Teleostei	Atheriniformes	Pseudomugilidae	Pseudomugil	Cercozoa	Glissomonadida	?	?	?	?	91	2
ASV1845	19	10	74	0	0	0	0	0	0	97.802	Chordata	Teleostei	Atheriniformes	Pseudomugilidae	Pseudomugil	Cercozoa	Glissomonadida	?	?	?	?	91	2
ASV2572	53	0	0	0	0	0	0	0	0	97.802	Chordata	Teleostei	Atheriniformes	Pseudomugilidae	Pseudomugil	Cercozoa	?	?	?	?	?	91	2
ASV1276	46	8	6	2	6	0	39	51	48	97.802	Chordata	Teleostei	Atheriniformes	Pseudomugilidae	Pseudomugil	Cercozoa	Cercomonadidae	?	?	?	uncultured Cercozoa	91	2
ASV2234	0	0	0	25	26	21	0	0	0	97.778	Chordata	Teleostei	Atheriniformes	Pseudomugilidae	Pseudomugil							90	2
ASV2604	0	2	11	0	4	32	2	0	0	97.468	Chordata	Teleostei	Atheriniformes	Pseudomugilidae	Pseudomugil	Cercozoa	Glissomonadida	?	?	?	?	79	2
ASV741	1	5	19	0	0	0	443	65	65	97.436	Chordata	Teleostei	Atheriniformes	Pseudomugilidae	Pseudomugil	Cercozoa	Incertae Sedis	?	?	?	?	78	2
ASV2587	0	0	0	0	0	0	51	0	1	96.939	Chordata	Teleostei	Atheriniformes	Pseudomugilidae	Pseudomugil							98	2
ASV1825	6	10	83	0	2	0	0	3	1	96.703	Chordata	Teleostei	Atheriniformes	Pseudomugilidae	Pseudomugil	Cercozoa	Glissomonadida	?	?	?	?	91	3
ASV2144	0	0	0	30	21	27	0	0	0	96.667	Chordata	Teleostei	Atheriniformes	Pseudomugilidae	Pseudomugil							90	3
ASV1254	13	6	11	32	57	77	4	5	10	96.203	Chordata	Teleostei	Atheriniformes	Pseudomugilidae	Pseudomugil	Cercozoa	Glissomonadida	?	?	?	?	79	3
ASV2830	0	0	0	0	0	0	40	0	1	95.918	Chordata	Teleostei	Atheriniformes	Pseudomugilidae	Pseudomugil	Cercozoa	Glissomonadida	?	?	?	?	98	3
ASV1790	0	0	16	0	1	0	75	10	7	95.604	Chordata	Teleostei	Atheriniformes	Pseudomugilidae	Pseudomugil	Cercozoa	Incertae Sedis	?	?	?	?	91	4
ASV2022	8	2	5	0	0	0	22	20	29	95.455	Chordata	Teleostei	Atheriniformes	Pseudomugilidae	Pseudomugil							88	4
ASV1109	92	27	146	8	0	0	3	0	0	94.681	Chordata	Teleostei	Atheriniformes	Pseudomugilidae	Pseudomugil	?	?	?	?	?	?	94	5
ASV2894	35	0	0	0	0	0	0	0	4	94.681	Chordata	Teleostei	Atheriniformes	Pseudomugilidae	Pseudomugil	?	?	?	?	?	?	94	5
ASV844	305	50	96	16	0	0	5	0	0	93.617	Chordata	Teleostei	Atheriniformes	Pseudomugilidae	Pseudomugil	?	?	?	?	?	?	94	6
ASV2799	0	0	0	43	0	0	0	0	0	93.617	Chordata	Teleostei	Atheriniformes	Pseudomugilidae	Pseudomugil	?	?	?	?	?	?	94	6
ASV2813	40	0	0	0	0	0	0	0	2	93.617	Chordata	Teleostei	Atheriniformes	Pseudomugilidae	Pseudomugil	?	?	?	?	?	?	94	6
ASV1360	91	22	64	0	0	0	0	0	0	93.617	Chordata	Teleostei	Atheriniformes	Pseudomugilidae	Pseudomugil	Cercozoa	?	?	?	?	?	94	6
ASV1473	24	30	56	20	15	0	4	0	4	92.941	Chordata	Teleostei	Atheriniformes	Pseudomugilidae	Pseudomugil	?	Discosea	?	?	?	?	85	6
ASV1968	7	23	23	15	17	0	1	1	4	92.941	Chordata	Teleostei	Atheriniformes	Pseudomugilidae	Pseudomugil	?	Discosea	?	?	?	?	85	6
ASV2372	8	9	16	14	11	0	0	1	4	92.941	Chordata	Teleostei	Atheriniformes	Pseudomugilidae	Pseudomugil	?	Discosea	?	?	?	?	85	6
ASV1116	39	31	161	0	0	0	23	4	15	92.771	Chordata	Teleostei	Atheriniformes	Pseudomugilidae	Pseudomugil	Cercozoa	Vampyrellidae	?	?	?	?	83	6
ASV2282	0	0	0	60	0	0	9	0	0	92.553	Chordata	Teleostei	Atheriniformes	Pseudomugilidae	Pseudomugil	?	?	?	?	?	?	94	7
ASV929	168	37	186	0	0	0	0	0	0	92.553	Chordata	Teleostei	Atheriniformes	Pseudomugilidae	Pseudomugil	Cercozoa	?	?	?	?	?	94	7
ASV1323	87	46	42	11	0	0	3	0	0	92.473	Chordata	Teleostei	Atheriniformes	Pseudomugilidae	Pseudomugil	?	?	?	?	?	?	93	7
ASV2505	3	19	19	0	1	0	3	4	7	91.86	Chordata	Teleostei	Atheriniformes	Pseudomugilidae	Pseudomugil							86	7
ASV2484	46	11	0	0	0	0	0	0	0	91.667	Chordata	Teleostei	Atheriniformes	Pseudomugilidae	Pseudomugil							84	7
ASV574	933	0	0	0	0	0	0	0	0	91.566	Chordata	Teleostei	Atheriniformes	Pseudomugilidae	Pseudomugil							83	7
ASV613	0	0	0	238	324	273	0	0	0	91.525	Chordata	Teleostei	Atheriniformes	Pseudomugilidae	Pseudomugil	Cercozoa	?	?	?	?	?	118	6
ASV635	0	0	0	178	325	274	0	0	0	91.509	Chordata	Teleostei	Atheriniformes	Pseudomugilidae	Pseudomugil	Cercozoa	?	?	?	?	?	106	5
ASV2564	0	0	0	6	47	0	0	0	0	91.463	Chordata	Teleostei	Atheriniformes	Pseudomugilidae	Pseudomugil							82	7
ASV1662	0	0	0	100	3	21	0	0	0	90.698	Chordata	Teleostei	Atheriniformes	Pseudomugilidae	Pseudomugil							86	8
ASV1623	28	15	85	0	0	0	0	1	0	90.698	Chordata	Teleostei	Atheriniformes	Pseudomugilidae	Pseudomugil							86	8
ASV1710	0	0	0	25	92	0	0	0	0	90.244	Chordata	Teleostei	Atheriniformes	Pseudomugilidae	Pseudomugil							82	8
ASV1145	13	18	20	58	98	9	29	4	12	76.082	Chordata	Teleostei	Atheriniformes	Pseudomugilidae	Pseudomugil	Cercozoa	Glissomonadida	?	?	?	?	485	83
ASV2250	0	4	10	0	12	39	0	4	1	75.464	Chordata	Teleostei	Atheriniformes	Pseudomugilidae	Pseudomugil	Cercozoa	?	?	?	?	uncultured Cercozoa	485	89
ASV1296	6	18	59	18	24	52	5	10	6	75.359	Chordata	Teleostei	Atheriniformes	Pseudomugilidae	Pseudomugil	Cercozoa	?	?	?	?	?	487	89
ASV1212	11	27	7	44	88	17	22	7	10	75.264	Chordata	Teleostei	Atheriniformes	Pseudomugilidae	Pseudomugil	Cercozoa	Glissomonadida	?	?	?	?	473	84
ASV1829	0	0	0	3	36	65	0	0	0	75.155	Chordata	Teleostei	Atheriniformes	Pseudomugilidae	Pseudomugil	Cercozoa	Glissomonadida	?	?	?	?	483	93
ASV1622	11	9	21	48	0	0	36	1	3	100	Chordata	Teleostei	Centrarchiformes	Percichthyidae	Nannoperca							31	0
ASV2900	0	8	0	0	0	0	1	2	28	95.181	Chordata	Teleostei	Centrarchiformes	Percichthyidae	Nannoperca	Cercozoa	Vampyrellidae	?	?	?	?	83	4
ASV1208	11	27	0	0	0	0	70	55	73	93.902	Chordata	Teleostei	Centrarchiformes	Percichthyidae	Nannoperca	Cercozoa	Vampyrellidae	?	?	?	?	82	5
ASV1820	4	0	5	53	24	4	0	8	7	93.182	Chordata	Teleostei	Centrarchiformes	Percichthyidae	Nannoperca	Cercozoa	Vampyrellidae	?	?	?	?	88	6
ASV621	810	0	0	0	0	0	0	0	0	91.111	Chordata	Teleostei	Centrarchiformes	Percichthyidae	Nannoperca							90	7
ASV446	0	54	0	0	159	0	146	347	679	86.747	Chordata	Teleostei	Centrarchiformes	Percichthyidae	Nannoperca	Ciliophora	Intramacronucleata	Litostomatea	Mesodiniidae	?	?	83	11
ASV730	97	0	0	0	0	0	4	207	306	86.747	Chordata	Teleostei	Centrarchiformes	Percichthyidae	Nannoperca	Ciliophora	Intramacronucleata	Litostomatea	Mesodiniidae	?	?	83	11
ASV807	0	519	5	0	0	0	0	0	0	84.337	Chordata	Teleostei	Centrarchiformes	Percichthyidae	Nannoperca	Microsporidia	?	?	?	?	?	83	13
ASV1441	160	0	0	0	0	0	0	0	0	80.723	Chordata	Teleostei	Centrarchiformes	Percichthyidae	Nannoperca							83	16
ASV2472	38	0	12	0	0	0	8	0	0	99.574	Chordata	Teleostei	Gobiiformes	Eleotridae	Hypseleotris	Vertebrata	Actinopterygii	?	?	?	Mogurnda adspersa	470	2
ASV2026	7	2	0	64	7	6	0	0	0	98.729	Chordata	Teleostei	Gobiiformes	Eleotridae	Mogurnda	Vertebrata	Actinopterygii	?	?	?	?	472	5
ASV2529	5	0	0	39	2	9	0	0	0	98.511	Chordata	Teleostei	Gobiiformes	Eleotridae	Mogurnda	Vertebrata	Actinopterygii	?	?	?	?	470	6
ASV1061	49	10	35	27	57	96	21	1	1	100						Cercozoa	?	?	?	?	?	79	0
ASV1485	24	0	126	0	0	0	0	0	0	100						Cryptomycota	?	?	?	?	uncultured eukaryote	83	0
ASV934	0	0	0	315	44	27	0	0	0	100												88	0
ASV2651	0	0	49	0	0	0	0	0	0	100												83	0
ASV229	0	0	0	24	0	3855	0	0	0	99.568						Annelida	Clitellata	Haplotaxida	?	?	?	463	2
ASV451	440	25	305	183	198	197	0	4	1	99.349						Annelida	Clitellata	Haplotaxida	?	?	?	461	2
ASV485	456	34	235	149	149	199	0	3	13	99.349						Annelida	Clitellata	Haplotaxida	?	?	?	461	2
ASV266	0	0	0	32	0	3057	0	0	0	99.13						Annelida	Clitellata	Haplotaxida	?	?	?	460	4
ASV927	232	5	5	0	0	3	0	78	68	98.969						Rotifera	Monogononta	Ploimida	?	?	?	97	1
ASV1449	0	0	0	28	119	11	0	0	0	98.936												94	1
ASV191	2	0	0	38	0	4875	0	0	0	98.918						Annelida	Clitellata	Haplotaxida	?	?	?	462	4
ASV2238	6	3	2	0	0	0	57	2	1	98.913												92	0
ASV770	20	54	57	115	252	6	49	1	6	98.901						Centrohelida	?	?	?	?	?	91	0
ASV1396	145	0	23	0	0	0	0	0	0	98.901						Centrohelida	?	?	?	?	?	91	0
ASV2700	7	1	0	7	14	15	0	2	0	98.901						Centrohelida	?	?	?	?	?	91	0
ASV2614	0	0	0	24	0	0	27	0	0	98.889						Apicomplexa	Conoidasida	Gregarinasina	?	?	?	90	1
ASV1059	1	0	0	24	11	3	195	27	36	98.876												89	0
ASV1572	0	0	0	26	80	29	0	0	0	98.876												89	0
ASV1756	0	0	0	32	33	47	0	0	0	98.876												89	0
ASV2035	0	0	0	55	16	14	0	0	0	98.876												89	1
ASV2465	0	0	0	17	40	1	0	0	0	98.876												89	0
ASV975	0	0	0	21	322	13	0	0	0	98.864						?	?	?	?	?	?	88	1
ASV840	56	0	108	0	0	0	118	83	110	98.864						Cercozoa	Vampyrellidae	?	?	?	?	88	1
ASV1196	0	0	0	54	70	117	0	0	0	98.864						Ciliophora	Intramacronucleata	Armophorea	?	?	?	88	1
ASV1567	0	0	0	15	102	19	0	0	0	98.864						Ciliophora	Intramacronucleata	Armophorea	?	?	?	88	1
ASV1255	3	4	0	12	154	39	3	0	0	98.864												88	1
ASV1670	0	0	0	32	57	34	0	0	0	98.851						Ciliophora	Intramacronucleata	Conthreep	Oligohymenophorea	Protocyclidium	metagenome	87	1
ASV2438	22	11	26	0	0	0	0	0	0	98.837						Apicomplexa	Conoidasida	Gregarinasina	Eugregarinorida	?	?	86	1
ASV2281	0	0	0	0	0	69	0	0	0	98.802						Annelida	Clitellata	Haplotaxida	?	?	?	334	4
ASV1341	139	24	22	0	0	0	0	0	0	98.795						?	?	?	?	?	?	83	1
ASV1624	45	0	84	0	0	0	0	0	0	98.795												83	1
ASV2109	0	0	80	0	0	0	0	0	0	98.795												83	1
ASV808	22	50	35	143	206	6	47	2	11	98.734						Centrohelida	?	?	?	?	?	79	0
ASV2232	6	3	3	0	2	0	53	5	0	98.734												79	0
ASV1017	52	27	242	0	0	0	0	0	0	98.704						Annelida	Clitellata	Haplotaxida	?	?	?	463	6
ASV1271	0	0	0	71	0	0	0	40	97	98.667						Cercozoa	?	?	?	?	?	75	1
ASV1243	1	1	0	37	143	39	0	0	0	98.667												75	1
ASV806	0	0	0	98	417	9	0	0	0	97.917						Cercozoa	Thecofilosea	Incertae Sedis	?	?	?	96	2
ASV531	20	3	5	65	645	148	159	7	8	97.917						Nucleariidae and Fonticula group	?	?	?	?	?	96	2
ASV978	0	0	0	14	262	63	15	0	0	97.917						Nucleariidae and Fonticula group	?	?	?	?	?	96	2
ASV1210	0	0	0	0	233	0	0	0	0	97.872						Ciliophora	Intramacronucleata	Litostomatea	Haptoria	Homalozoon	?	94	2
ASV1945	0	0	0	93	0	0	0	0	0	97.872						Ciliophora	Intramacronucleata	Litostomatea	Haptoria	?	?	94	2
ASV2004	2	9	1	14	41	21	0	0	0	97.849												93	2
ASV2335	0	65	0	0	0	0	0	0	0	97.802						Apicomplexa	Conoidasida	Gregarinasina	?	?	?	91	2
ASV1365	160	0	15	0	0	0	0	0	0	97.802						Centrohelida	?	?	?	?	?	91	1
ASV1930	77	0	11	0	0	0	6	0	0	97.802						Centrohelida	?	?	?	?	?	91	1
ASV2454	47	0	3	0	0	0	8	0	0	97.802						Centrohelida	?	?	?	?	?	91	1
ASV2624	5	3	0	13	4	23	0	2	0	97.802						Centrohelida	?	?	?	?	?	91	1
ASV1265	0	0	3	15	19	0	129	10	34	97.753												89	1
ASV1598	0	0	0	17	82	32	0	0	0	97.753												89	1
ASV2074	0	0	0	36	46	1	0	0	0	97.753												89	1
ASV2380	0	0	0	5	41	17	0	0	0	97.753												89	1
ASV2704	0	0	0	17	27	2	0	0	0	97.753												89	1
ASV356	0	0	0	240	1541	121	0	0	0	97.727						?	?	?	?	?	?	88	2
ASV530	0	0	0	121	899	43	0	0	0	97.727												88	2
ASV2500	0	0	0	24	29	3	0	0	0	97.701						?	?	?	?	?	?	87	2
ASV2490	0	0	0	56	0	0	0	0	0	97.701						Apicomplexa	Conoidasida	?	?	?	?	87	2
ASV2685	0	0	0	0	2	0	0	21	24	97.701						Ciliophora	Intramacronucleata	Conthreep	Colpodea	Platyophrya	?	87	2
ASV1906	0	0	0	19	31	47	0	0	0	97.701												87	2
ASV1922	0	0	0	0	0	0	9	29	57	97.701												87	2
ASV49	0	0	0	0	0	0	44860	1228	1944	97.647						Apicomplexa	Conoidasida	Gregarinasina	?	?	?	85	0
ASV1971	0	0	0	0	0	0	83	2	6	97.647						Apicomplexa	?	?	?	?	?	85	0
ASV501	38	16	6	142	601	90	208	27	22	97.619						Nucleariidae and Fonticula group	?	?	?	?	?	84	2
ASV1006	0	0	0	14	244	69	5	0	0	97.619						Nucleariidae and Fonticula group	?	?	?	?	?	84	2
ASV794	384	31	117	0	0	0	0	5	0	97.59						?	?	?	?	?	?	83	2
ASV1181	188	19	39	0	0	0	0	0	0	97.59						?	?	?	?	?	?	83	2
ASV1219	0	0	0	189	41	0	0	0	0	97.59						?	?	?	?	?	?	83	2
ASV1312	0	0	0	150	43	0	0	0	0	97.59						?	?	?	?	?	?	83	2
ASV1729	53	0	61	0	0	0	1	0	0	97.59						?	?	?	?	?	?	83	2
ASV1844	0	0	0	79	24	0	0	0	0	97.59						?	?	?	?	?	?	83	2
ASV2884	0	0	39	0	0	0	0	0	0	97.59						Protosteliida	?	?	?	?	Protostelium mycophagum	83	2
ASV1272	43	32	133	0	0	0	0	0	0	97.5						Annelida	Clitellata	Haplotaxida	?	?	?	200	5
ASV1557	0	0	0	27	54	56	0	0	0	97.333												75	2
ASV2739	0	0	0	13	7	25	0	0	0	97.059						Phragmoplastophyta	Embryophyta	?	?	?	Acanthamoeba sp.	102	1
ASV1658	0	0	125	0	0	0	0	0	0	97						Ciliophora	Intramacronucleata	?	?	?	?	100	2
ASV691	87	55	89	36	98	103	114	30	62	96.97						Cercozoa	Glissomonadida	?	?	?	?	99	3
ASV2190	22	24	29	0	0	0	0	0	0	96.97												99	3
ASV590	194	26	125	55	150	2	280	19	50	96.939						Cercozoa	Glissomonadida	?	?	?	?	98	3
ASV824	0	0	0	93	352	20	0	5	24	96.875						Cercozoa	Thecofilosea	Incertae Sedis	?	?	?	96	3
ASV871	0	0	0	103	337	6	0	0	0	96.875						Cercozoa	Thecofilosea	Incertae Sedis	?	?	?	96	3
ASV1195	4	0	0	0	0	0	0	76	161	96.875						Cercozoa	?	?	?	?	?	96	3
ASV529	44	6	8	182	502	120	148	24	33	96.875						Nucleariidae and Fonticula group	?	?	?	?	?	96	3
ASV596	24	1	0	58	516	158	109	9	10	96.875						Nucleariidae and Fonticula group	?	?	?	?	?	96	3
ASV1952	0	7	0	32	33	20	0	0	0	96.774												93	3
ASV969	0	0	0	134	128	97	0	0	0	96.739						?	?	?	?	?	?	92	3
ASV513	0	0	0	514	426	179	0	0	0	96.739												92	3
ASV2215	0	0	0	73	0	0	0	0	0	96.703						Cercozoa	?	?	?	?	?	91	3
ASV1807	0	0	0	6	95	5	0	0	0	96.667						Ciliophora	Intramacronucleata	Conthreep	Plagiopylea	?	?	90	2
ASV478	0	0	854	1	109	0	290	0	2	96.591						Apicomplexa	?	?	?	?	?	88	1
ASV487	234	0	338	0	19	4	63	239	327	96.591						Cercozoa	Vampyrellidae	?	?	?	?	88	3
ASV1504	0	0	0	63	67	17	0	0	0	96.552						?	?	?	?	?	?	87	3
ASV2275	0	0	0	29	32	8	0	0	0	96.552						?	?	?	?	?	?	87	3
ASV79	2910	802	1585	0	0	0	3465	4860	7212	96.552						Cercozoa	Vampyrellidae	?	?	?	?	87	3
ASV81	3569	716	6874	2806	1115	204	3374	382	429	96.552						Cercozoa	Vampyrellidae	?	?	?	?	87	3
ASV130	1418	207	537	0	0	0	1305	2827	2758	96.552						Cercozoa	Vampyrellidae	?	?	?	?	87	3
ASV375	62	24	442	74	218	45	665	107	140	96.552						Cercozoa	Vampyrellidae	?	?	?	?	87	3
ASV415	89	50	52	0	0	0	297	495	545	96.552						Cercozoa	Vampyrellidae	?	?	?	?	87	3
ASV417	224	82	513	40	20	0	180	209	242	96.552						Cercozoa	Vampyrellidae	?	?	?	?	87	3
ASV566	276	26	38	0	0	0	166	261	192	96.552						Cercozoa	Vampyrellidae	?	?	?	?	87	3
ASV696	140	45	291	8	9	0	0	49	116	96.552						Cercozoa	Vampyrellidae	?	?	?	?	87	3
ASV733	88	24	40	33	141	0	232	12	40	96.552						Cercozoa	Glissomonadida	?	?	?	?	87	3
ASV899	52	5	361	0	0	0	0	0	0	96.552						Cercozoa	Vampyrellidae	?	?	?	?	87	3
ASV945	122	19	237	0	0	0	0	0	0	96.552						Cercozoa	Vampyrellidae	?	?	?	?	87	3
ASV993	114	44	179	0	0	0	0	4	0	96.552						Cercozoa	Vampyrellidae	?	?	?	?	87	3
ASV1027	0	27	275	10	4	0	0	0	0	96.552						Cercozoa	Vampyrellidae	?	?	?	?	87	3
ASV1038	1	0	21	66	62	0	96	29	36	96.552						Cercozoa	Vampyrellidae	?	?	?	?	87	3
ASV1125	11	12	17	0	0	0	81	51	95	96.552						Cercozoa	Vampyrellidae	?	?	?	?	87	3
ASV1237	135	6	82	0	0	0	0	0	0	96.552						Cercozoa	Vampyrellidae	?	?	?	?	87	3
ASV1558	0	2	26	68	38	0	1	1	1	96.552						Cercozoa	Vampyrellidae	?	?	?	?	87	3
ASV2221	7	6	28	0	1	9	12	2	8	96.552						Cercozoa	Vampyrellidae	?	?	?	?	87	3
ASV2654	2	2	5	0	0	0	19	4	17	96.552						Cercozoa	Vampyrellidae	?	?	?	?	87	3
ASV1970	0	1	15	47	20	0	0	1	7	96.552						Cercozoa	Vampyrellidae	?	?	?	?	87	3
ASV1199	0	0	0	36	82	122	0	0	0	96.552												87	3
ASV1720	0	0	0	32	52	32	0	0	0	96.552												87	3
ASV2122	0	0	0	0	0	0	5	33	41	96.552												87	3
ASV17	0	0	0	0	0	0	82904	3421	4867	96.471						Apicomplexa	Conoidasida	?	?	?	?	85	1
ASV70	0	0	0	0	0	0	22069	1713	2264	96.471						Apicomplexa	Conoidasida	?	?	?	?	85	1
ASV1966	0	0	0	0	0	0	82	2	7	96.471						Apicomplexa	?	?	?	?	?	85	1
ASV132	1640	264	3049	1237	519	69	1851	108	134	96.471						Cercozoa	Vampyrellidae	?	?	?	?	85	3
ASV1742	6	0	9	0	0	0	0	47	51	96.471						Ciliophora	Intramacronucleata	Conthreep	?	?	?	85	3
ASV913	0	0	0	322	53	28	0	0	0	96.471												85	3
ASV441	0	0	0	341	0	0	719	143	206	96.429						Apicomplexa	?	?	?	?	?	84	1
ASV1761	2	4	4	22	0	0	66	4	10	96.429						Apicomplexa	?	?	?	?	?	84	1
ASV577	42	62	9	170	601	41	0	0	0	96.429												84	3
ASV611	7	0	0	178	609	50	0	0	0	96.429												84	3
ASV1201	165	23	50	0	0	0	1	0	0	96.386						?	?	?	?	?	?	83	3
ASV2655	0	0	0	20	19	0	0	5	4	96.386						?	?	?	?	?	?	83	3
ASV173	0	0	0	0	0	0	5769	0	0	96.386						Apicomplexa	Conoidasida	?	?	?	?	83	1
ASV1131	28	28	182	0	0	0	7	8	12	96.386						Cercozoa	Vampyrellidae	?	?	?	?	83	3
ASV1593	0	0	0	59	73	0	0	0	0	96.386						Cercozoa	Vampyrellidae	?	?	?	?	83	3
ASV522	868	53	154	0	0	0	0	7	13	96.386						Cryptomycota	?	?	?	?	?	83	3
ASV987	0	105	242	0	0	0	0	0	0	96.154						Cercozoa	Vampyrellidae	?	?	?	?	78	3
ASV483	8	0	0	140	770	317	4	4	4	96.154						Nucleariidae and Fonticula group	?	?	?	?	?	104	2
ASV2422	0	0	0	31	4	25	0	0	0	96.117						?	Discosea	Centramoebida	?	Acanthamoeba	Acanthamoeba sp. SE2_6F	103	4
ASV1127	151	21	83	4	7	0	0	0	0	96.078						Cercozoa	Glissomonadida	?	?	?	?	102	4
ASV1965	0	0	0	2	0	23	66	0	0	96.078						Cercozoa	?	?	?	?	?	102	4
ASV559	185	0	327	0	15	4	40	222	191	96.053						Cercozoa	Vampyrellidae	?	?	?	?	76	3
ASV282	178	190	640	0	0	0	1498	189	189	96						Cercozoa	Vampyrellidae	?	?	?	?	75	3
ASV344	63	0	61	0	0	0	1138	306	444	96						Cercozoa	Vampyrellidae	?	?	?	?	75	3
ASV371	43	3	34	531	281	91	536	104	173	96						Cercozoa	Vampyrellidae	?	?	?	?	75	3
ASV863	2	1	242	0	0	0	51	57	100	96						Cercozoa	Vampyrellidae	?	?	?	?	75	3
ASV623	151	22	292	0	0	0	108	103	132	96						Cercozoa	Vampyrellidae	?	?	?	?	75	3
ASV891	40	15	36	24	50	116	82	31	36	95.96						Cercozoa	Glissomonadida	?	?	?	?	99	4
ASV2668	11	22	15	0	0	0	0	0	0	95.96												99	4
ASV92	1688	540	533	0	0	0	3738	4245	5439	95.946						Cercozoa	Vampyrellidae	?	?	?	?	74	3
ASV968	75	29	88	0	0	0	59	57	52	95.946						Cercozoa	Vampyrellidae	?	?	?	?	74	3
ASV1139	211	22	30	0	0	0	0	0	0	95.89						Cryptomycota	?	?	?	?	?	73	3
ASV1854	0	0	0	0	0	0	102	0	0	95.876						Cercozoa	Thecofilosea	Ebriacea	?	?	?	97	4
ASV776	182	227	0	142	0	0	0	0	3	95.833						Apicomplexa	?	?	?	?	?	72	1
ASV205	4	0	70	28	4	0	3943	185	209	95.833						Cercozoa	Vampyrellidae	?	?	?	?	72	3
ASV2506	5	16	27	0	0	0	0	2	6	95.833						Ciliophora	Intramacronucleata	Spirotrichea	Oligotrichia	Spirostrombidium	?	72	3
ASV2324	0	0	0	0	21	0	22	14	9	95.775						?	?	?	?	?	?	71	3
ASV656	245	252	0	222	0	0	0	0	2	95.775						Apicomplexa	?	?	?	?	?	71	1
ASV754	197	242	0	142	0	0	1	0	0	95.775						Apicomplexa	?	?	?	?	?	71	1
ASV2050	0	0	0	24	32	28	0	0	0	95.745												94	4
ASV2523	0	0	0	0	0	0	50	3	2	95.745												94	4
ASV1695	0	25	0	0	0	0	40	20	35	95.714						?	?	?	?	?	?	70	3
ASV464	0	0	0	457	532	310	0	0	0	95.652						?	?	?	?	?	?	92	4
ASV520	70	1024	0	1	0	0	2	0	0	95.652						Apicomplexa	Conoidasida	Gregarinasina	Eugregarinorida	?	?	92	2
ASV560	0	400	581	0	0	0	0	0	0	95.556						Cercozoa	Vampyrellidae	?	?	?	?	90	4
ASV742	0	194	403	0	0	0	0	0	0	95.556						Cercozoa	Vampyrellidae	?	?	?	?	90	4
ASV653	0	0	448	0	68	0	211	0	0	95.455						Apicomplexa	?	?	?	?	?	88	2
ASV999	0	0	277	0	0	0	0	24	36	95.455						Apicomplexa	?	?	?	?	?	88	2
ASV167	922	52	2020	137	310	46	861	821	984	95.455						Cercozoa	Vampyrellidae	?	?	?	?	88	4
ASV1733	4	8	43	12	8	15	3	3	19	95.402						?	?	?	?	?	?	87	4
ASV24	10934	2302	5204	0	0	0	14860	19781	24863	95.402						Cercozoa	Vampyrellidae	?	?	?	?	87	4
ASV153	1527	309	2027	1360	507	61	1033	120	145	95.402						Cercozoa	Vampyrellidae	?	?	?	?	87	4
ASV241	56	7	43	1283	984	180	473	253	311	95.402						Cercozoa	Vampyrellidae	?	?	?	?	87	4
ASV502	381	112	650	0	4	0	0	0	0	95.402						Cercozoa	Vampyrellidae	?	?	?	?	87	4
ASV539	59	25	196	66	183	20	307	80	93	95.402						Cercozoa	Vampyrellidae	?	?	?	?	87	4
ASV602	228	26	18	0	0	0	135	242	223	95.402						Cercozoa	Vampyrellidae	?	?	?	?	87	4
ASV612	167	29	27	0	0	0	121	296	195	95.402						Cercozoa	Vampyrellidae	?	?	?	?	87	4
ASV676	46	33	66	0	0	0	98	198	255	95.402						Cercozoa	Vampyrellidae	?	?	?	?	87	4
ASV964	1	2	172	0	0	0	37	62	87	95.402						Cercozoa	Vampyrellidae	?	?	?	?	87	4
ASV1009	107	38	186	0	0	0	0	0	0	95.402						Cercozoa	Vampyrellidae	?	?	?	?	87	4
ASV1042	105	50	143	0	0	0	8	0	0	95.402						Cercozoa	Vampyrellidae	?	?	?	?	87	4
ASV1056	23	21	12	0	0	0	55	86	101	95.402						Cercozoa	Vampyrellidae	?	?	?	?	87	4
ASV1079	0	0	0	191	88	9	0	0	3	95.402						Cercozoa	Vampyrellidae	?	?	?	?	87	4
ASV1083	0	8	28	120	124	0	1	5	3	95.402						Cercozoa	Vampyrellidae	?	?	?	?	87	4
ASV1100	5	0	22	66	71	0	55	38	23	95.402						Cercozoa	Vampyrellidae	?	?	?	?	87	4
ASV1211	177	4	52	0	0	0	0	0	0	95.402						Cercozoa	Vampyrellidae	?	?	?	?	87	4
ASV1306	55	1	138	0	0	0	0	0	0	95.402						Cercozoa	Vampyrellidae	?	?	?	?	87	4
ASV1746	0	5	16	48	34	0	6	3	1	95.402						Cercozoa	Vampyrellidae	?	?	?	?	87	4
ASV1840	0	0	7	38	48	7	4	0	0	95.402						Cercozoa	Vampyrellidae	?	?	?	?	87	4
ASV1899	7	4	5	0	0	0	15	23	44	95.402						Cercozoa	Vampyrellidae	?	?	?	?	87	4
ASV2213	11	5	30	0	2	7	9	4	5	95.402						Cercozoa	Vampyrellidae	?	?	?	?	87	4
ASV2326	0	0	16	20	24	0	0	6	0	95.402						Cercozoa	Vampyrellidae	?	?	?	?	87	4
ASV2389	0	0	0	46	16	0	0	0	0	95.402						Cercozoa	Vampyrellidae	?	?	?	?	87	4
ASV973	107	43	113	6	14	0	0	37	37	95.402						Cercozoa	Vampyrellidae	?	?	?	?	87	4
ASV1290	0	11	171	16	3	0	0	0	0	95.402						Cercozoa	Vampyrellidae	?	?	?	?	87	4
ASV868	48	1	15	90	155	92	49	1	0	95.402						Dinoflagellata	Dinophyceae	Gonyaulacales	?	?	?	87	4
ASV1860	3	0	1	2	21	35	27	4	9	95.305						Gastrotricha	?	Chaetonotida	?	?	Chaetonotus sp.	213	9
ASV407	52	0	41	0	0	0	721	344	391	95.294						Cercozoa	Vampyrellidae	?	?	?	?	85	4
ASV1238	175	29	18	0	0	0	0	0	0	95.294						Cryptomycota	?	?	?	?	?	85	4
ASV1508	121	5	21	0	0	0	0	0	0	95.294						Cryptomycota	?	?	?	?	?	85	4
ASV431	0	0	0	318	0	0	640	205	287	95.238						Apicomplexa	?	?	?	?	?	84	2
ASV552	342	426	0	218	0	0	3	0	8	95.238						Apicomplexa	?	?	?	?	?	84	2
ASV781	134	201	0	142	0	0	40	19	14	95.238						Apicomplexa	?	?	?	?	?	84	2
ASV1525	0	0	0	0	0	0	136	6	1	95.238						Cercozoa	?	?	?	?	?	84	4
ASV386	88	89	17	403	1025	72	0	0	0	95.238												84	4
ASV540	4	4	0	241	726	51	0	0	0	95.238												84	4
ASV1102	280	0	0	0	0	0	0	0	0	95.238												84	4
ASV1351	181	0	0	0	0	0	0	0	0	95.238												84	4
ASV1121	0	12	4	0	0	11	33	71	140	95.238												84	4
ASV526	2	0	0	143	614	307	3	8	7	95.192						Nucleariidae and Fonticula group	?	?	?	?	?	104	3
ASV700	0	190	21	0	0	0	0	122	319	95.181						?	?	?	?	?	?	83	4
ASV1288	16	57	0	0	0	0	0	24	106	95.181						?	?	?	?	?	?	83	4
ASV1757	0	7	0	0	0	0	22	32	51	95.181						?	?	?	?	?	?	83	4
ASV1859	0	0	0	40	46	0	0	5	11	95.181						?	?	?	?	?	?	83	4
ASV1894	0	0	0	86	7	0	0	1	4	95.181						?	?	?	?	?	?	83	4
ASV1929	0	5	0	0	0	0	30	22	37	95.181						?	?	?	?	?	?	83	4
ASV2796	0	0	0	0	28	0	0	15	0	95.181						?	?	?	?	?	?	83	4
ASV1114	19	19	201	0	0	0	22	3	10	95.181						Cercozoa	Vampyrellidae	?	?	?	?	83	4
ASV1293	0	0	0	122	77	0	0	0	0	95.181						Cercozoa	Vampyrellidae	?	?	?	?	83	4
ASV1331	18	27	111	0	0	0	4	11	16	95.181						Cercozoa	Vampyrellidae	?	?	?	?	83	4
ASV2162	0	0	0	41	36	0	0	0	0	95.181						Cercozoa	Vampyrellidae	?	?	?	?	83	4
ASV2340	61	0	4	0	0	0	0	0	0	95.181												83	4
ASV2383	44	0	19	0	0	0	0	0	0	95.181												83	4
ASV2807	8	0	10	0	0	0	24	0	0	95.181												83	4
ASV357	0	0	0	586	0	0	775	244	296	95.122						Apicomplexa	?	?	?	?	?	82	2
ASV2649	0	0	0	0	0	0	38	4	7	95.122												82	4
ASV1348	101	23	52	2	4	0	0	0	0	95.098						Cercozoa	Glissomonadida	?	?	?	uncultured Cercozoa	102	5
ASV2118	0	0	0	4	0	17	57	0	1	95.098						Cercozoa	?	?	?	?	?	102	5
ASV2377	0	0	0	4	16	43	0	0	0	95.098						Cercozoa	?	?	?	?	?	102	4
ASV2665	0	0	0	39	9	0	0	0	0	95.05						Cercozoa	?	?	?	?	?	101	4
ASV2670	5	4	0	38	1	0	0	0	0	95.05						Cercozoa	Glissomonadida	?	?	?	uncultured Cercozoa	101	5
ASV1357	0	0	0	94	53	31	0	0	0	95						Centrohelida	?	?	?	?	uncultured eukaryote	100	4
ASV753	170	42	255	62	20	34	0	1	0	94.949						?	?	?	?	?	?	99	5
ASV2030	5	0	0	23	42	15	0	0	0	94.898						Cercozoa	Thecofilosea	Cryomonadida	Rhizaspididae	Rhogostoma	metagenome	98	5
ASV2112	5	40	17	0	0	0	2	4	12	94.898						Ciliophora	Intramacronucleata	Spirotrichea	Oligotrichia	?	?	98	5
ASV1547	31	12	63	0	4	28	0	0	0	94.898												98	5
ASV1917	15	0	0	81	0	0	0	0	0	94.783						Phragmoplastophyta	?	?	?	?	?	115	6
ASV2412	0	0	0	6	4	37	0	6	8	94.643						Cercozoa	Novel Clade 10	?	?	?	?	112	5
ASV827	32	460	0	0	0	0	0	0	0	94.565						Apicomplexa	Conoidasida	Gregarinasina	Eugregarinorida	?	?	92	3
ASV2357	0	0	0	2	62	0	0	0	0	94.505						Gastrotricha	?	?	?	?	?	91	5
ASV624	86	26	68	0	0	0	127	209	282	94.444						Cercozoa	Vampyrellidae	?	?	?	?	90	5
ASV983	4	11	175	107	54	0	0	0	0	94.382						Cercozoa	Vampyrellidae	?	?	?	?	89	3
ASV1649	0	3	4	55	21	28	15	0	0	94.382						Cercozoa	?	?	?	?	?	89	3
ASV2384	0	9	54	0	0	0	0	0	0	94.382												89	3
ASV2730	0	0	13	17	6	0	0	0	9	94.382												89	3
ASV707	0	0	336	0	75	0	229	2	0	94.318						Apicomplexa	?	?	?	?	?	88	3
ASV712	0	0	375	0	78	0	181	0	0	94.318						Apicomplexa	?	?	?	?	?	88	3
ASV990	0	0	250	0	0	0	0	59	34	94.318						Apicomplexa	?	?	?	?	?	88	3
ASV1096	0	0	193	0	1	0	0	43	45	94.318						Apicomplexa	Conoidasida	?	?	?	?	88	3
ASV324	224	362	283	334	565	277	162	17	22	94.318						Cercozoa	?	?	?	?	?	88	5
ASV2271	0	7	0	0	0	0	52	10	0	94.318						Cercozoa	Vampyrellidae	?	?	?	?	88	5
ASV158	739	418	2014	22	44	50	1794	683	950	94.253						Cercozoa	Vampyrellidae	?	?	?	?	87	5
ASV732	129	37	51	0	0	0	91	153	151	94.253						Cercozoa	Vampyrellidae	?	?	?	?	87	5
ASV1721	22	5	3	0	0	0	19	27	40	94.253						Cercozoa	Vampyrellidae	?	?	?	?	87	5
ASV2575	9	28	8	0	7	0	0	0	0	94.186						?	?	?	?	?	?	86	5
ASV985	34	0	48	0	0	0	264	2	1	94.186						Ascomycota	Saccharomycetes	Saccharomycetales	Dipodascaceae	Magnusiomyces	uncultured eukaryote	86	5
ASV1910	0	0	0	27	67	2	0	0	0	94.118												102	4
ASV2414	0	0	0	55	6	0	0	0	0	94.059						Cercozoa	?	?	?	?	?	101	5
ASV592	22	271	15	81	85	0	12	131	273	93.976						?	?	?	?	?	?	83	5
ASV798	0	173	262	0	0	0	0	30	68	93.976						Cercozoa	Vampyrellidae	?	?	?	?	83	5
ASV1819	8	0	59	0	0	0	35	0	3	93.976						Cercozoa	Vampyrellidae	?	?	?	?	83	5
ASV1016	0	7	38	0	0	0	204	35	38	93.976						Cercozoa	Vampyrellidae	?	?	?	?	83	5
ASV2189	0	0	4	0	0	0	10	15	46	93.976												83	5
ASV2194	19	0	32	0	0	0	24	0	0	93.976												83	5
ASV2861	0	0	2	0	0	0	11	4	23	93.976												83	5
ASV1740	49	6	41	0	2	16	0	0	0	93.878												98	6
ASV652	0	0	0	639	2	0	91	0	1	93.75						Apicomplexa	Conoidasida	Gregarinasina	Eugregarinorida	?	?	80	3
ASV750	0	0	0	448	3	0	136	0	1	93.671						Apicomplexa	Conoidasida	Gregarinasina	Eugregarinorida	?	?	79	3
ASV713	29	604	0	0	0	0	0	0	0	93.478						Apicomplexa	Conoidasida	Gregarinasina	Eugregarinorida	?	?	92	4
ASV864	0	2	0	331	0	0	119	0	1	93.478						Apicomplexa	Conoidasida	Gregarinasina	Eugregarinorida	?	?	92	4
ASV774	55	500	0	0	0	0	0	0	0	93.478						Apicomplexa	Conoidasida	Gregarinasina	Eugregarinorida	?	?	92	4
ASV911	0	2	0	332	4	0	64	0	2	93.478						Apicomplexa	Conoidasida	Gregarinasina	Eugregarinorida	?	?	92	4
ASV834	0	0	0	0	27	0	455	0	0	93.333						Gastrotricha	?	?	?	?	?	90	6
ASV749	0	0	470	0	0	0	0	50	69	93.182						Apicomplexa	?	?	?	?	?	88	4
ASV18	11898	3059	7236	0	0	0	16732	19229	29572	93.103						Cercozoa	Vampyrellidae	?	?	?	?	87	6
ASV2778	1	0	16	27	0	0	0	0	0	93.069												101	6
ASV336	0	0	2	614	0	0	1005	181	295	93.056						Apicomplexa	?	?	?	?	?	72	5
ASV648	0	0	0	241	187	312	0	0	0	93.043						Cercozoa	Glissomonadida	?	?	?	?	115	6
ASV775	0	0	4	233	139	179	0	0	0	93.043						Cercozoa	Glissomonadida	?	?	?	?	115	6
ASV2491	0	0	1	0	0	30	25	0	0	93.033						Platyhelminthes	Catenulida	?	Stenostomidae	?	Rhynchoscolex simplex	244	16
ASV948	15	23	214	0	0	0	0	40	82	92.958						Cercozoa	Vampyrellidae	?	?	?	?	71	1
ASV2689	0	0	0	0	16	0	31	0	0	92.941												85	6
ASV1053	11	21	167	0	0	0	0	31	70	92.771						Cercozoa	Vampyrellidae	?	?	?	?	83	2
ASV2093	0	24	0	0	0	0	1	18	38	92.771						Cercozoa	Vampyrellidae	?	?	?	?	83	2
ASV1069	0	0	28	0	0	0	266	0	0	92.771												83	4
ASV2132	15	0	0	25	3	32	0	3	1	92.632						Ciliophora	Intramacronucleata	Conthreep	Oligohymenophorea	?	?	95	7
ASV2512	0	0	55	0	0	0	0	0	0	92.553						Cercozoa	Vampyrellidae	?	?	?	?	94	7
ASV1745	70	8	0	35	0	0	0	0	0	92.481						Ascomycota	?	?	?	?	?	133	10
ASV2533	0	0	0	9	12	34	0	0	0	92.419						Gastrotricha	?	?	?	?	?	277	18
ASV802	0	0	0	419	1	0	109	0	2	92.391						Apicomplexa	Conoidasida	Gregarinasina	Eugregarinorida	?	?	92	5
ASV2899	17	0	0	0	8	14	0	0	0	92.308												104	7
ASV660	0	0	0	259	182	275	0	0	0	92.157						Cercozoa	Glissomonadida	?	?	?	?	102	6
ASV2235	5	3	44	0	4	0	6	4	6	91.935						Cercozoa	Imbricatea	Spongomonadida	?	Spongomonas	uncultured Cercozoa	124	8
ASV201	37	0	3	2450	1483	664	4	0	0	91.882						Cryptomycota	Incertae Sedis	Incertae Sedis	Incertae Sedis	?	?	271	18
ASV1591	0	0	0	0	42	90	0	0	0	91.667						?	?	?	?	?	?	132	10
ASV239	0	0	0	641	2119	707	40	31	66	91.667						Ciliophora	Intramacronucleata	Conthreep	Phyllopharyngea	?	?	96	8
ASV47	7103	2045	3724	0	0	0	7909	12461	16057	91.566						Cercozoa	Vampyrellidae	?	?	?	?	83	3
ASV1126	53	59	18	0	0	0	23	61	53	91.566						Cercozoa	Vampyrellidae	?	?	?	?	83	7
ASV1188	0	0	28	0	0	0	214	0	0	91.566												83	5
ASV558	0	0	4	314	265	403	0	0	0	91.304						Cercozoa	Glissomonadida	?	?	?	?	115	8
ASV1413	0	0	0	0	164	0	0	0	0	91.089						?	?	?	?	?	?	101	6
ASV1602	0	0	0	0	131	0	0	0	0	91.089						?	?	?	?	?	?	101	6
ASV1072	0	0	0	58	88	145	2	0	0	90.909						?	?	?	?	?	?	132	11
ASV395	0	0	0	0	0	0	1639	0	0	90.805						Apicomplexa	Conoidasida	?	?	?	?	87	4
ASV174	842	373	352	0	0	0	904	1432	1817	90.361						Cercozoa	Vampyrellidae	?	?	?	?	83	8
ASV976	83	77	13	0	0	0	11	110	61	90.361						Cercozoa	Vampyrellidae	?	?	?	?	83	8
ASV2589	0	0	0	0	0	0	41	3	8	90.179						?	?	?	?	?	?	112	9
ASV1814	0	2	21	0	0	83	0	0	0	89.849						Arthropoda	Arachnida	Araneae	?	?	Dendrolycosa cruciata	463	42
ASV2090	52	4	25	0	0	0	0	0	0	89.72						?	?	?	?	?	?	107	10
ASV1587	72	14	47	0	0	0	0	0	0	89.72						Cercozoa	?	?	?	?	?	107	10
ASV2638	0	0	0	16	1	31	1	0	0	89.655						Rotifera	Monogononta	Ploimida	?	?	uncultured eukaryote	319	27
ASV2526	18	37	0	0	0	0	0	0	0	89.535						Microsporidia	?	?	?	?	?	86	9
ASV1352	0	5	0	18	126	32	0	0	0	89.503						Preaxostyla	?	?	?	?	?	181	17
ASV859	0	0	0	0	456	0	0	0	0	89.474						Gastrotricha	?	Chaetonotida	?	?	uncultured eukaryote	114	11
ASV882	0	0	0	158	7	275	0	0	0	89.474						Gastrotricha	?	?	?	?	?	114	11
ASV1601	0	0	0	0	51	80	0	0	0	89.394						?	?	?	?	?	?	132	13
ASV183	0	0	0	2941	1059	1136	0	0	0	89.103						?	Trebouxiophyceae	?	?	?	?	156	17
ASV645	11	0	14	273	394	57	3	0	0	89.103						Rotifera	Monogononta	Flosculariacea	?	?	Collotheca campanulata	468	39
ASV2255	0	0	7	2	0	61	0	0	0	88.936						Platyhelminthes	Catenulida	?	?	?	?	470	36
ASV1634	0	0	0	30	0	97	1	0	0	88.913						Platyhelminthes	Catenulida	?	Stenostomidae	?	Stenostomum simplex	469	42
ASV414	0	0	0	0	0	0	596	370	562	88.889												90	9
ASV695	0	0	0	0	0	0	224	198	238	88.889												90	9
ASV789	0	0	0	0	0	0	233	92	218	88.889												90	9
ASV1981	54	1	14	8	0	13	0	0	0	88.865						Platyhelminthes	Catenulida	?	Stenostomidae	?	Stenostomum leucops	467	44
ASV780	20	0	5	204	288	26	8	0	0	88.816						Rotifera	Monogononta	Flosculariacea	?	?	Collotheca campanulata	456	39
ASV550	769	0	133	0	0	0	105	0	0	88.793						Nematozoa	Enoplea	Triplonchida	?	?	?	464	44
ASV190	0	8	0	13	0	1893	3018	3	7	88.699						Platyhelminthes	Catenulida	?	Stenostomidae	?	Rhynchoscolex simplex	469	42
ASV463	7	0	11	1	2	1	1280	6	0	88.699						Rotifera	Monogononta	Flosculariacea	?	?	Collotheca campanulata	469	39
ASV1673	0	0	0	22	0	97	4	0	0	88.671						Platyhelminthes	Catenulida	?	Stenostomidae	?	Stenostomum simplex	459	42
ASV84	162	9	46	961	48	9905	7005	11	12	88.651						Platyhelminthes	Catenulida	?	Stenostomidae	?	Stenostomum sp.	467	45
ASV830	0	0	0	251	0	236	0	0	0	88.651						Platyhelminthes	Catenulida	?	Stenostomidae	?	Stenostomum sp.	467	45
ASV400	0	0	0	97	5	1485	0	0	0	88.646						Platyhelminthes	Catenulida	?	Stenostomidae	?	Stenostomum sp.	458	44
ASV1489	0	0	0	149	0	0	0	0	0	88.602						Rotifera	Monogononta	Ploimida	?	?	uncultured eukaryote	465	48
ASV1178	22	19	33	0	0	0	0	85	89	88.578						Rotifera	Monogononta	Ploimida	?	?	?	464	47
ASV172	1	1	3	6	0	1801	3966	0	4	88.571						Platyhelminthes	Catenulida	?	Stenostomidae	?	Rhynchoscolex simplex	455	41
ASV73	0	0	4	6075	10529	6259	114	0	0	88.559						Gastrotricha	?	?	?	?	?	472	42
ASV2248	0	0	2	0	0	69	0	0	0	88.559						Platyhelminthes	Catenulida	?	?	?	?	472	37
ASV245	0	0	0	177	4	3308	0	0	0	88.546						Platyhelminthes	Catenulida	?	Stenostomidae	?	Stenostomum sp.	454	44
ASV644	0	0	0	182	9	563	0	0	0	88.546						Platyhelminthes	Catenulida	?	?	?	?	454	46
ASV685	10	0	2	0	33	31	53	268	283	88.535						Rotifera	Monogononta	Flosculariacea	?	?	Collotheca campanulata	471	40
ASV1874	0	0	0	4	38	58	0	0	0	88.462						Gastrotricha	?	?	?	?	?	130	13
ASV885	0	0	0	196	0	240	0	0	0	88.437						Platyhelminthes	Catenulida	?	Stenostomidae	?	Stenostomum sp.	467	46
ASV1224	1	35	190	2	0	0	0	0	0	88.421						Annelida	Clitellata	Haplotaxida	?	?	?	475	42
ASV378	0	0	0	493	100	1053	3	61	52	88.412						Rotifera	Monogononta	Ploimida	?	?	uncultured eukaryote	466	47
ASV1969	58	1	20	4	1	7	0	0	0	88.409						Platyhelminthes	Catenulida	?	Stenostomidae	?	Stenostomum leucops	440	43
ASV516	39	291	787	0	0	0	0	0	0	88.406						Cryptomycota	?	?	?	?	?	138	16
ASV930	29	99	262	0	0	0	0	0	0	88.406						Cryptomycota	?	?	?	?	?	138	16
ASV647	0	0	2	0	0	0	96	338	306	88.352						Rotifera	Monogononta	Ploimida	?	?	?	455	43
ASV412	4	5	20	0	0	0	0	679	825	88.298						Rotifera	Monogononta	Ploimida	?	?	?	470	43
ASV722	6	0	0	0	59	37	0	240	280	88.273						Rotifera	Monogononta	Flosculariacea	?	?	Collotheca campanulata	469	41
ASV1947	0	0	0	0	0	93	0	0	0	88.248						Rotifera	Monogononta	Ploimida	?	?	?	468	47
ASV385	672	0	11	3	0	4	766	102	143	88.223						Rotifera	Monogononta	Ploimida	?	?	?	467	50
ASV2263	2	55	0	0	0	0	0	8	5	88.197						Rotifera	Monogononta	Ploimida	?	?	?	466	52
ASV436	959	0	12	5	3	0	276	80	95	88.197						Rotifera	Monogononta	Ploimida	?	?	?	466	47
ASV381	1	1	27	0	0	0	0	719	974	88.184						Rotifera	Monogononta	Ploimida	?	?	Dicranophorus forcipatus	457	42
ASV686	62	0	5	2	5	0	0	274	328	88.172						Rotifera	Monogononta	Ploimida	?	?	?	465	50
ASV2051	0	5	0	38	15	25	0	0	1	88.172						Rotifera	Monogononta	Ploimida	?	?	?	465	50
ASV467	330	5	0	277	36	383	47	85	122	88.158						Rotifera	Monogononta	Ploimida	?	?	?	456	45
ASV1267	17	33	23	0	0	0	0	77	59	88.158						Rotifera	Monogononta	Ploimida	?	?	?	456	46
ASV804	61	0	9	5	3	1	0	174	273	88.132						Rotifera	Monogononta	Ploimida	?	?	?	455	49
ASV2470	41	0	0	3	0	11	3	0	0	88.06						Platyhelminthes	Catenulida	?	Stenostomidae	?	Rhynchoscolex simplex	469	45
ASV799	492	0	41	0	0	0	0	0	0	88.053						Nematozoa	Enoplea	Triplonchida	?	?	?	452	46
ASV316	0	0	0	999	459	164	138	259	268	88.009						Rotifera	Monogononta	Ploimida	?	?	uncultured eukaryote	467	47
ASV1177	49	0	0	120	0	79	0	0	0	88.009						Rotifera	Monogononta	Ploimida	?	?	?	467	47
ASV1979	0	0	0	40	14	34	0	0	2	87.983						Nematozoa	Chromadorea	Chromadorida	?	?	?	466	50
ASV564	269	4	0	174	19	276	54	87	83	87.965						Rotifera	Monogononta	Ploimida	?	?	?	457	46
ASV110	280	0	204	1371	910	1435	3375	1430	1773	87.957						Rotifera	Monogononta	Ploimida	?	?	?	465	51
ASV2431	0	28	32	0	0	0	0	0	0	87.952												83	10
ASV1506	0	0	0	0	0	0	147	0	0	87.931						Nematozoa	Enoplea	Triplonchida	?	?	?	464	48
ASV225	2589	0	21	0	0	0	0	648	751	87.872						Rotifera	Monogononta	Ploimida	?	?	?	470	41
ASV723	0	12	35	295	1	252	2	10	14	87.832						Rotifera	Monogononta	Ploimida	?	?	?	452	52
ASV387	0	0	0	0	0	39	1651	0	0	87.821						Rotifera	Monogononta	Ploimida	?	?	uncultured eukaryote	468	50
ASV265	928	1191	1	0	0	0	165	334	475	87.794						Rotifera	Monogononta	Ploimida	?	?	?	467	48
ASV1563	0	0	0	136	0	0	0	0	0	87.794						Rotifera	Monogononta	Ploimida	?	?	?	467	52
ASV600	0	0	0	32	704	141	0	0	0	87.773						Rotifera	Monogononta	Ploimida	?	?	?	458	40
ASV182	2139	1174	4	0	0	0	241	665	966	87.768						Rotifera	Monogononta	Ploimida	?	?	Trichocerca rattus	466	50
ASV331	0	0	889	0	0	0	0	538	703	87.768						Rotifera	Monogononta	Ploimida	?	?	?	466	49
ASV340	0	0	0	836	401	148	111	269	289	87.768						Rotifera	Monogononta	Ploimida	?	?	uncultured eukaryote	466	48
ASV453	0	0	0	0	0	38	1305	0	0	87.719						Rotifera	Monogononta	Ploimida	?	?	uncultured eukaryote	456	49
ASV850	419	0	45	0	0	0	0	0	0	87.716						Nematozoa	Enoplea	Triplonchida	?	?	?	464	49
ASV489	0	0	0	134	449	556	0	34	32	87.716						Rotifera	Monogononta	Ploimida	?	?	?	464	54
ASV262	902	134	1088	264	276	409	0	7	22	87.712						Gastrotricha	?	?	?	?	?	472	44
ASV1957	0	0	2	19	45	6	0	13	7	87.712						Platyhelminthes	Catenulida	?	?	?	?	472	42
ASV900	0	0	0	176	190	18	0	15	18	87.686						Rotifera	Monogononta	Ploimida	?	?	?	471	44
ASV956	40	78	253	0	0	0	0	0	0	87.681						Cryptomycota	?	?	?	?	?	138	17
ASV797	7	0	5	0	0	0	151	181	189	87.665						Rotifera	Monogononta	Flosculariacea	?	?	Testudinella sp.	454	48
ASV866	296	5	9	0	0	3	0	65	74	87.638						Rotifera	Monogononta	Ploimida	?	?	?	453	51
ASV1737	0	0	0	33	0	77	4	0	0	87.633						Platyhelminthes	Catenulida	?	Stenostomidae	?	Stenostomum simplex	469	48
ASV2608	0	0	4	0	9	27	10	1	0	87.591						?	?	?	?	?	?	274	27
ASV636	0	0	0	42	585	140	0	1	0	87.583						Rotifera	Monogononta	Ploimida	?	?	?	451	51
ASV1984	0	0	0	0	0	0	44	9	37	87.582						Platyhelminthes	Rhabditophora	Rhabdocoela	?	?	?	306	36
ASV160	251	0	60	1014	660	1227	1273	949	1186	87.58						Rotifera	Monogononta	Ploimida	?	?	?	467	53
ASV757	4	0	9	0	0	0	191	172	202	87.58						Rotifera	Monogononta	Flosculariacea	?	?	Testudinella sp.	467	48
ASV737	0	0	0	179	7	421	0	0	0	87.554						Platyhelminthes	Catenulida	?	?	?	?	466	52
ASV716	304	0	0	0	0	106	0	114	102	87.554						Rotifera	Monogononta	Ploimida	?	?	Dicranophorus forcipatus	466	51
ASV61	308	0	5	22847	347	7632	346	322	281	87.527						Rotifera	Monogononta	Ploimida	?	?	?	465	52
ASV1448	13	0	0	75	9	23	13	14	12	87.527						Rotifera	Monogononta	Ploimida	?	?	?	465	49
ASV1798	0	4	1	42	20	40	0	0	0	87.527						Rotifera	Monogononta	Ploimida	?	?	?	465	53
ASV1399	1	0	11	44	81	13	0	9	8	87.473						Platyhelminthes	Catenulida	?	?	?	?	471	41
ASV382	1227	0	0	0	0	0	0	224	269	87.445						Rotifera	Monogononta	Ploimida	?	?	?	454	49
ASV236	25	10	0	1580	1735	336	0	0	0	87.366						Nematozoa	Enoplea	Enoplida	?	?	Rhabdolaimus aquaticus	467	50
ASV1536	0	0	0	35	63	42	0	0	0	87.366						Rotifera	Monogononta	Ploimida	?	?	?	467	53
ASV31	5018	4691	3427	16914	2965	13091	5453	5205	6885	87.339						Rotifera	Monogononta	Ploimida	?	?	uncultured eukaryote	466	50
ASV154	0	5627	1193	0	0	2	0	0	0	87.284						Rotifera	Monogononta	Ploimida	?	?	?	464	52
ASV168	1	5282	837	0	0	0	0	0	0	87.284						Rotifera	Monogononta	Ploimida	?	?	?	464	54
ASV1409	0	0	0	58	107	0	0	0	0	87.234						Platyhelminthes	Catenulida	?	?	?	?	470	44
ASV697	1	0	1	106	0	154	193	92	110	87.168						Rotifera	Monogononta	Ploimida	?	?	?	452	52
ASV227	17	15	0	1855	1759	297	0	0	0	87.152						Nematozoa	Enoplea	Enoplida	?	?	Rhabdolaimus aquaticus	467	51
ASV55	291	0	4	27144	422	10758	597	367	450	87.146						Rotifera	Monogononta	Ploimida	?	?	uncultured eukaryote	459	53
ASV1344	0	0	0	67	117	0	0	0	0	87.076						Platyhelminthes	Catenulida	?	?	?	?	472	45
ASV597	4	0	125	629	25	88	2	5	4	87.069						Rotifera	Monogononta	Ploimida	?	?	?	464	57
ASV1780	7	3	78	16	6	0	0	0	0	87.013						Arthropoda	Ellipura	Collembola	?	?	Sminthurides aquaticus	462	54
ASV2478	0	0	0	0	0	0	0	35	22	86.966						Rotifera	Monogononta	Ploimida	?	?	?	468	49
ASV304	8	16	0	983	1198	238	12	0	0	86.938						Nematozoa	Enoplea	Enoplida	?	?	Rhabdolaimus aquaticus	467	52
ASV2493	45	2	9	0	0	0	0	0	0	86.853						Arthropoda	Ellipura	Collembola	?	?	?	464	58
ASV1209	0	0	0	0	0	0	117	85	32	86.747												83	11
ASV1715	16	46	49	0	0	0	0	0	6	86.747												83	11
ASV1891	0	0	0	0	0	0	44	35	19	86.747												83	11
ASV248	17	20	0	1522	1338	424	29	0	0	86.724						Nematozoa	Enoplea	Enoplida	?	?	Rhabdolaimus aquaticus	467	53
ASV180	0	0	0	3852	274	1121	0	0	0	86.592						?	Chlorophyceae	Chlamydomonadales	?	Chloromonas	Chloromonas perforata	179	21
ASV63	136	4	147	438	1411	3093	0	11006	14615	86.2						Gastrotricha	?	?	?	?	?	471	51
ASV1731	13	2	0	0	0	47	30	5	18	86.047						?	?	?	?	?	?	86	10
ASV2680	5	15	10	0	0	0	0	7	10	85.978						Protalveolata	Perkinsidae	A31	?	?	?	271	32
ASV2787	0	0	0	0	0	0	0	11	32	85.882												85	12
ASV2037	0	0	0	22	63	0	0	0	0	85.87						Gastrotricha	?	?	?	?	?	460	50
ASV1925	7	77	1	0	0	0	0	7	3	85.867						Rotifera	Monogononta	Ploimida	?	?	?	467	56
ASV78	104	5	35	404	767	1841	0	8236	9646	85.835						Gastrotricha	?	?	?	?	?	473	53
ASV319	0	0	70	0	0	0	0	1063	1137	85.835						Gastrotricha	?	?	?	?	?	473	53
ASV1117	8	0	0	2	257	4	2	0	0	85.805						Gastrotricha	?	Chaetonotida	?	?	Aspidiophorus ophiodermus	472	52
ASV1314	54	0	32	73	0	34	0	0	0	85.805						Gastrotricha	?	?	?	?	?	472	52
ASV2424	0	6	0	0	46	8	0	0	0	85.775						Platyhelminthes	Catenulida	?	?	?	?	471	50
ASV2251	0	0	0	0	0	0	40	29	1	85.714						Microsporidia	?	?	?	?	?	84	10
ASV156	6756	0	31	0	0	0	0	0	0	85.652						Gastrotricha	?	?	?	?	?	460	52
ASV447	63	0	181	0	277	827	32	0	0	85.624						Gastrotricha	?	?	?	?	?	473	53
ASV200	4	0	13	608	2552	1493	0	0	0	85.532						Gastrotricha	?	?	?	?	?	470	53
ASV639	53	0	9	33	195	94	311	27	40	85.532						Gastrotricha	?	?	?	?	?	470	54
ASV1915	0	5	0	0	87	4	0	0	0	85.529						Platyhelminthes	Catenulida	?	?	?	?	463	50
ASV91	0	0	5	3507	9139	3927	1	0	0	85.443						Gastrotricha	?	?	?	?	?	474	54
ASV545	82	0	128	0	179	614	12	0	0	85.443						Gastrotricha	?	?	?	?	?	474	54
ASV188	24	0	27	960	2120	1823	0	0	1	85.412						Gastrotricha	?	?	?	?	?	473	52
ASV21	0	0	16	99	1624	914	77962	0	0	85.381						Gastrotricha	?	?	?	?	?	472	54
ASV28	0	0	3	13718	40379	16664	142	0	0	85.381						Gastrotricha	?	?	?	?	?	472	54
ASV65	9	5	17	6591	15839	7522	183	3	5	85.294						Gastrotricha	?	?	?	?	?	476	51
ASV116	8	0	0	0	1504	0	8848	0	0	85.263						Gastrotricha	?	?	?	?	?	475	54
ASV33	19	8	23	11863	32745	17276	380	3	6	85.169						Gastrotricha	?	?	?	?	?	472	55
ASV744	44	0	7	34	154	88	203	25	42	85.169						Gastrotricha	?	?	?	?	?	472	55
ASV48	390	19	783	1485	4655	7876	305	11528	21334	85.138						Gastrotricha	?	?	?	?	?	471	56
ASV1425	1	0	3	28	85	43	1	0	0	85.13						Preaxostyla	?	?	?	?	?	269	33
ASV264	0	2	11	0	0	0	0	1253	1830	85.106						Gastrotricha	?	?	?	?	?	470	56
ASV1233	5	1	0	29	146	42	2	0	0	85.075						Preaxostyla	?	?	?	?	?	268	33
ASV583	0	0	0	438	4	470	0	0	0	85.033						Gastrotricha	?	?	?	?	?	461	53
ASV254	9	0	9	556	1480	1174	0	0	0	84.967						Gastrotricha	?	?	?	?	?	459	55
ASV341	2037	0	16	0	0	1	0	0	0	84.958						Gastrotricha	?	?	?	?	?	472	55
ASV2742	0	0	0	25	0	18	0	2	0	84.899						Rotifera	Monogononta	Ploimida	?	?	uncultured eukaryote	298	37
ASV651	82	0	2	50	156	118	287	17	21	84.842						Gastrotricha	?	?	?	?	?	475	56
ASV259	36	0	0	60	2828	253	0	0	0	84.816						Gastrotricha	?	?	?	?	?	461	54
ASV1167	3	0	0	33	194	23	0	0	0	84.758						Preaxostyla	?	?	?	?	?	269	34
ASV1796	4	0	0	46	5	49	3	0	0	84.722						Rotifera	Monogononta	Ploimida	?	?	uncultured eukaryote	288	36
ASV255	0	1	14	0	0	0	0	1360	1848	84.683						Gastrotricha	?	?	?	?	?	457	56
ASV837	56	0	2	33	96	71	190	9	22	84.632						Gastrotricha	?	?	?	?	?	475	55
ASV905	21	0	7	31	106	55	138	23	30	84.632						Gastrotricha	?	?	?	?	?	475	57
ASV1334	2	0	3	7	20	50	1	30	73	84.615						Gastrotricha	?	?	?	?	?	416	50
ASV662	16	0	0	33	90	86	454	17	17	84.567						Gastrotricha	?	?	?	?	?	473	57
ASV72	3796	0	0	3639	9671	5914	0	0	0	84.534						Gastrotricha	?	?	?	?	?	472	59
ASV351	127	0	4	82	469	354	784	50	97	84.534						Gastrotricha	?	?	?	?	?	472	59
ASV758	25	0	1	20	88	66	327	15	34	84.534						Gastrotricha	?	?	?	?	?	472	59
ASV2487	0	0	0	29	1	24	0	2	1	84.52						Rotifera	Monogononta	Ploimida	?	?	uncultured eukaryote	323	38
ASV633	59	0	4	37	156	144	262	36	86	84.501						Gastrotricha	?	?	?	?	?	471	59
ASV2219	0	0	0	0	5	68	0	0	0	84.468						Cnidaria	Scyphozoa	Semaeostomeae	?	?	marine metagenome	470	58
ASV267	70	0	0	234	810	859	1032	18	56	84.464						Gastrotricha	?	?	?	?	?	457	54
ASV841	4	0	0	31	37	402	0	0	0	84.382						Gastrotricha	?	?	?	?	?	461	56
ASV765	17	0	2	10	76	63	369	6	23	84.355						Gastrotricha	?	?	?	?	?	473	58
ASV2417	0	0	0	27	33	0	0	0	0	84.351						Rotifera	Monogononta	Flosculariacea	?	?	Collotheca campanulata	262	33
ASV60	3718	0	0	4749	16526	8921	9	0	1	84.322						Gastrotricha	?	?	?	?	?	472	60
ASV1913	22	0	65	0	0	4	0	1	4	84.322						Gastrotricha	?	?	?	?	?	472	58
ASV906	8	0	0	26	44	333	0	0	0	84.234						Gastrotricha	?	Chaetonotida	?	?	Polymerurus nodicaudus	444	54
ASV557	977	0	9	0	0	3	0	0	0	84.13						Gastrotricha	?	?	?	?	?	460	57
ASV672	73	0	6	30	165	88	293	17	27	84.076						Gastrotricha	?	?	?	?	?	471	61
ASV103	0	0	9	3053	5521	3113	1	0	0	84						Gastrotricha	?	?	?	?	?	475	59
ASV2286	0	0	0	5	25	39	0	0	0	83.982						Gastrotricha	?	?	?	?	?	437	54
ASV94	0	0	3	0	0	0	8633	2802	3678	83.974						Platyhelminthes	Rhabditophora	Rhabdocoela	?	?	?	468	66
ASV6	12724	12	583	8750	31890	20476	63097	2340	3481	83.932						Gastrotricha	?	?	?	?	?	473	60
ASV1734	23	0	84	0	0	4	0	2	1	83.898						Gastrotricha	?	?	?	?	?	472	60
ASV68	0	0	20	0	0	0	17661	4335	6846	83.789						Platyhelminthes	Rhabditophora	Rhabdocoela	?	?	?	475	61
ASV178	0	0	0	13	4374	971	0	0	0	83.766						Gastrotricha	?	?	?	?	?	462	59
ASV2772	2	1	41	0	0	0	0	0	0	83.764						?	?	?	?	?	?	271	36
ASV1532	9	0	0	77	17	19	20	0	0	83.764						Centrohelida	?	?	?	?	?	271	41
ASV186	0	0	0	394	2542	2101	0	0	1	83.721						Gastrotricha	?	?	?	?	?	473	60
ASV1992	0	0	0	63	6	20	0	0	0	83.636						?	?	?	?	?	?	275	38
ASV854	0	0	0	0	0	0	311	52	96	83.592						Platyhelminthes	Rhabditophora	Rhabdocoela	?	?	?	451	65
ASV1232	0	0	2	0	0	0	0	109	115	83.5						Rotifera	Monogononta	Ploimida	?	?	?	200	32
ASV995	0	0	235	69	31	0	6	0	0	83.404						Chytridiomycota	Chytridiomycetes	Chytridiales	Chytridiaceae	Dendrochytridium	?	470	64
ASV199	16	26	830	0	0	0	0	1688	2163	83.369						Platyhelminthes	Rhabditophora	Rhabdocoela	?	?	Gieysztoria cf.	469	63
ASV690	0	0	472	108	54	0	15	4	21	83.333						Chytridiomycota	Chytridiomycetes	Chytridiales	Chytridiaceae	Dendrochytridium	?	468	64
ASV2223	31	35	7	0	0	0	0	0	0	83.333						Protalveolata	Perkinsidae	A31	?	?	?	276	37
ASV486	0	0	907	0	5	0	326	0	0	83.298						Nematozoa	Chromadorea	Monhysterida	?	?	?	473	54
ASV452	0	0	0	400	58	815	1	32	38	83.251						Rotifera	Monogononta	Ploimida	?	?	uncultured eukaryote	203	27
ASV475	0	6	927	0	8	0	318	0	0	83.087						Nematozoa	Chromadorea	Monhysterida	?	?	?	473	55
ASV528	0	4	733	0	4	0	337	0	0	83.08						Nematozoa	Chromadorea	Monhysterida	?	?	?	461	53
ASV224	19	23	606	0	0	0	0	1571	1799	83.051						Platyhelminthes	Rhabditophora	Rhabdocoela	?	?	Gieysztoria cf.	472	65
ASV614	0	11	42	0	80	0	0	326	376	82.979						Nematozoa	Chromadorea	Araeolaimida	?	?	?	470	64
ASV1354	7	0	0	7	9	3	145	3	6	82.933						Gastrotricha	?	?	?	?	?	416	58
ASV1262	86	31	20	9	10	0	10	14	32	82.909						Rigifilida	?	?	?	?	?	275	43
ASV2049	34	11	11	8	2	0	7	2	9	82.909						Rigifilida	?	?	?	?	?	275	43
ASV924	0	4	27	0	33	0	0	153	175	82.906						Nematozoa	Chromadorea	Araeolaimida	?	?	?	468	64
ASV228	46	0	34	894	1204	1711	0	0	1	82.875						Gastrotricha	?	?	?	?	?	473	65
ASV361	4	0	0	21	1250	606	0	0	0	82.863						Gastrotricha	?	?	?	?	?	461	63
ASV699	2	0	0	257	144	247	0	1	1	82.721						Rotifera	Bdelloidea	?	?	?	?	272	42
ASV704	0	11	12	0	61	0	0	263	300	82.692						Nematozoa	Chromadorea	Araeolaimida	?	?	?	468	65
ASV1811	86	0	0	0	0	0	2	13	5	82.684						Chytridiomycota	Chytridiomycetes	Chytridiales	?	?	?	462	70
ASV1801	44	16	9	3	5	0	7	10	13	82.671						Rigifilida	?	?	?	?	?	277	44
ASV1068	0	0	150	114	30	0	0	0	0	82.655						Chytridiomycota	Chytridiomycetes	Chytridiales	Chytridiaceae	Dendrochytridium	?	467	69
ASV121	44	92	2022	0	0	0	0	3096	4618	82.627						Platyhelminthes	Rhabditophora	Rhabdocoela	?	?	Gieysztoria cf.	472	67
ASV853	0	9	17	0	60	0	0	194	180	82.553						Nematozoa	Chromadorea	Araeolaimida	?	?	?	470	66
ASV366	0	20	1382	0	7	0	427	0	0	82.516						Nematozoa	Chromadorea	Monhysterida	?	?	?	469	65
ASV34	0	0	0	23193	15380	21943	0	1	0	82.482						Rotifera	Bdelloidea	Adinetida	?	?	?	274	43
ASV514	3	0	0	7	0	0	995	59	55	82.479						Phragmoplastophyta	Embryophyta	Calobryales	?	?	?	468	64
ASV1190	18	2	104	0	3	0	49	17	49	82.441						Chytridiomycota	Chytridiomycetes	?	?	?	?	467	68
ASV1559	3	5	0	29	4	0	9	31	55	82.378						Phragmoplastophyta	?	?	?	?	uncultured eukaryote	471	61
ASV2191	2	4	35	4	0	0	3	13	14	82.353						?	Choanoflagellida	?	?	?	?	476	60
ASV936	4	0	0	74	259	48	0	0	0	82.353						Preaxostyla	?	?	?	?	?	221	31
ASV40	0	0	0	14849	29559	11102	0	0	0	82.34						Nematozoa	Chromadorea	Rhabditida	?	?	Euteratocephalus palustris	470	64
ASV1203	0	0	0	29	98	111	0	0	0	82.337						Gastrotricha	?	?	?	?	?	368	52
ASV2897	0	6	0	18	10	0	4	0	1	82.227						Ascomycota	?	?	?	?	?	467	73
ASV390	4	0	0	9	0	0	1557	50	51	82.198						Phragmoplastophyta	Embryophyta	Salviniales	?	?	?	455	63
ASV1503	43	31	12	8	9	0	11	9	24	82.182						Rigifilida	?	?	?	?	?	275	45
ASV1579	4	0	0	16	48	50	16	0	0	82.108						Gastrotricha	?	?	?	?	?	408	56
ASV1744	0	0	0	2	15	96	0	0	0	82.105						Phragmoplastophyta	?	?	?	?	?	475	56
ASV1923	0	0	0	1	12	82	0	0	0	82.105						Phragmoplastophyta	?	?	?	?	?	475	56
ASV140	606	390	682	1282	1442	461	1587	609	977	82.051						Chytridiomycota	Chytridiomycetes	Chytridiales	?	?	?	468	68
ASV268	18	0	0	64	33	61	2655	104	127	82.051						Phragmoplastophyta	Embryophyta	Salviniales	?	?	?	468	66
ASV62	0	0	0	7447	18159	5256	0	0	0	82.03						Nematozoa	Chromadorea	Rhabditida	?	?	Euteratocephalus palustris	473	66
ASV689	0	0	2	198	170	298	0	4	3	81.985						Rotifera	Bdelloidea	Adinetida	?	?	?	272	44
ASV2031	0	35	22	0	3	0	0	9	16	81.974						Chytridiomycota	Chytridiomycetes	Chytridiales	?	?	?	466	68
ASV2437	0	2	2	0	0	0	24	10	21	81.953						Chytridiomycota	Chytridiomycetes	?	?	?	?	471	69
ASV42	0	0	0	13862	30114	8908	0	1	0	81.953						Nematozoa	Chromadorea	Rhabditida	?	?	Euteratocephalus palustris	471	66
ASV2292	0	5	7	0	56	0	0	0	0	81.884						Cnidaria	Myxozoa	Bivalvulida	?	?	?	138	21
ASV2578	0	7	14	4	0	0	1	17	9	81.799						?	Choanoflagellida	?	?	?	?	478	63
ASV53	0	0	0	13269	22495	6822	0	0	0	81.741						Nematozoa	Chromadorea	Rhabditida	?	?	Euteratocephalus palustris	471	67
ASV2297	0	0	0	16	6	46	0	0	0	81.679						Rotifera	Bdelloidea	Adinetida	?	?	?	131	19
ASV2620	1	4	26	4	0	3	12	0	0	81.667						Ascomycota	Dothideomycetes	Pleosporales	Didymosphaeriaceae	Didymosphaeria	Didymosphaeria variabile	300	41
ASV2047	0	0	0	83	1	0	0	0	0	81.655						Cercozoa	Incertae Sedis	?	?	?	?	278	38
ASV727	0	0	28	359	132	58	0	13	27	81.646						Phragmoplastophyta	?	?	?	?	?	474	60
ASV573	9	16	65	0	0	0	529	144	173	81.624						?	?	?	?	?	?	468	71
ASV2405	0	0	26	0	1	25	9	0	0	81.607						Phragmoplastophyta	?	?	?	?	?	473	62
ASV413	8	0	36	801	342	264	32	17	28	81.568						Phragmoplastophyta	?	?	?	?	?	472	62
ASV810	60	71	25	0	0	0	115	122	125	81.545						Chytridiomycota	Chytridiomycetes	?	?	?	?	466	73
ASV2773	0	0	44	0	0	0	0	0	0	81.505						?	?	?	?	?	?	465	75
ASV541	6	0	0	505	227	286	0	0	0	81.489						Phragmoplastophyta	?	?	?	?	?	470	66
ASV218	0	0	0	1483	524	1197	513	189	203	81.441						?	?	?	?	?	?	458	69
ASV760	24	16	94	0	0	0	219	112	107	81.435						?	Choanoflagellida	?	?	?	?	474	64
ASV544	0	0	26	530	286	136	2	11	27	81.435						Phragmoplastophyta	?	?	?	?	?	474	61
ASV1433	37	1	1	3	0	0	59	25	34	81.429						?	Choanoflagellida	?	?	?	?	490	56
ASV1242	0	0	0	62	159	0	0	0	0	81.416						Cnidaria	Myxozoa	Bivalvulida	?	?	?	113	17
ASV1641	4	67	30	0	2	0	1	3	20	81.41						Chytridiomycota	Chytridiomycetes	Chytridiales	?	?	?	468	71
ASV1674	16	2	37	0	5	0	19	14	29	81.41						Dinoflagellata	Dinophyceae	?	?	?	?	468	73
ASV655	0	0	0	290	402	25	0	1	4	81.41						Phragmoplastophyta	?	?	?	?	?	468	72
ASV805	284	0	0	0	0	75	0	87	80	81.377						Rotifera	Monogononta	Ploimida	?	?	Dicranophorus forcipatus	247	41
ASV2765	0	17	11	0	0	0	4	7	5	81.37						LKM15	?	?	?	?	?	467	75
ASV124	204	91	1061	3388	1314	2105	283	456	700	81.37						Phragmoplastophyta	?	?	?	?	?	467	69
ASV339	81	0	70	843	334	188	99	205	237	81.37						Phragmoplastophyta	?	?	?	?	?	467	72
ASV992	0	21	321	0	0	0	0	0	0	81.277						Phragmoplastophyta	?	?	?	?	?	470	68
ASV2336	0	0	2	21	42	0	0	0	0	81.237						Neocallimastigomycota	Neocallimastigomycetes	Neocallimastigales	Neocallimastigaceae	?	uncultured fungus	469	70
ASV144	8	0	18	5634	489	1564	18	1	3	81.237						Phragmoplastophyta	?	?	?	?	?	469	69
ASV1832	70	18	16	0	0	0	0	0	0	81.237						Protalveolata	Perkinsidae	A31	?	?	?	469	68
ASV411	142	0	92	514	119	109	88	203	267	81.195						Phragmoplastophyta	?	Desmidiales	?	Cosmarium	Cosmarium granatum	452	70
ASV1253	24	15	113	1	0	59	0	0	3	81.156						Ascomycota	Arthoniomycetes	?	?	?	Phaeococcomycetaceae sp.	467	75
ASV1924	0	0	0	8	1	6	0	28	52	81.156						Dinoflagellata	Dinophyceae	?	?	?	?	467	76
ASV1175	65	0	45	0	0	0	24	52	63	81.156						Phragmoplastophyta	?	?	?	?	?	467	72
ASV1816	0	46	20	0	0	0	6	14	19	81.116						LKM15	?	?	?	?	?	466	74
ASV958	0	0	300	0	0	0	9	34	23	81.064						Phragmoplastophyta	?	?	?	?	?	470	68
ASV83	18	1	150	9020	5493	4081	150	57	111	81.023						Phragmoplastophyta	?	?	?	?	?	469	70
ASV99	1	0	0	10503	783	2474	0	0	0	81.023						Phragmoplastophyta	?	?	?	?	?	469	70
ASV1398	107	39	21	0	0	0	0	0	0	81.023						Protalveolata	Perkinsidae	A31	?	?	?	469	69
ASV1607	28	4	2	8	0	0	35	20	34	81.02						?	Choanoflagellida	?	?	?	?	490	58
ASV2082	7	0	0	17	11	47	0	0	0	81.013						Protalveolata	Perkinsidae	A31	?	?	?	474	68
ASV109	100	12	233	4593	3413	1908	110	210	273	80.973						Phragmoplastophyta	?	?	?	?	?	473	63
ASV2272	6	4	34	0	0	0	21	0	4	80.969						Ascomycota	Dothideomycetes	Pleosporales	Didymosphaeriaceae	Didymosphaeria	Didymosphaeria variabile	289	41
ASV1914	0	0	0	9	87	0	0	0	0	80.942						LKM15	?	?	?	?	?	467	78
ASV2558	6	0	0	11	8	28	0	0	0	80.932						?	?	?	?	?	?	472	68
ASV729	0	0	0	263	328	21	0	0	3	80.901						Phragmoplastophyta	?	?	?	?	?	466	74
ASV657	9	0	0	0	0	0	185	218	309	80.892						?	?	?	?	?	?	471	70
ASV2613	0	0	0	49	1	1	0	0	0	80.866						Apicomplexa	Conoidasida	Coccidia	Eimeriorina	Eimeria	Eimeria sp. ex Mastomys natalensis	439	63
ASV1158	70	53	74	7	8	0	22	18	5	80.851						Chytridiomycota	Chytridiomycetes	Chytridiales	Chytriomycetaceae	Chytriomyces	Chytriomyces sp. WB 235A	470	72
ASV1185	28	0	0	47	60	0	11	26	72	80.842						Rotifera	Bdelloidea	Adinetida	?	?	?	475	70
ASV2137	15	3	10	0	3	0	3	14	30	80.815						Chytridiomycota	Monoblepharidomycetes	Monoblepharidales	Harpochytriaceae	Harpochytrium	?	417	72
ASV2185	75	0	0	0	0	0	0	0	0	80.802						Ciliophora	Intramacronucleata	Conthreep	Colpodea	Hausmanniella	Hausmanniella discoidea	474	59
ASV1507	15	19	50	2	7	11	41	0	2	80.802						Protalveolata	Perkinsidae	?	?	?	?	474	69
ASV1916	12	6	29	0	1	13	31	3	1	80.802						Protalveolata	Perkinsidae	?	?	?	?	474	69
ASV553	9	0	0	484	205	298	0	0	0	80.786						Phragmoplastophyta	?	?	?	?	?	458	67
ASV2080	21	12	12	8	9	0	15	5	0	80.769						Protalveolata	Perkinsidae	A31	?	?	?	468	72
ASV1951	0	0	0	23	39	31	0	0	0	80.757						Gastrotricha	?	Chaetonotida	?	?	Aspidiophorus ophiodermus	317	45
ASV2826	3	0	3	0	13	0	0	3	19	80.72						?	?	?	?	?	?	472	63
ASV1279	20	21	82	0	8	17	53	2	3	80.72						Protalveolata	Perkinsidae	?	?	?	?	472	69
ASV2699	0	0	0	0	0	46	0	0	0	80.687						Ascomycota	Dothideomycetes	?	?	?	?	466	69
ASV2304	0	0	0	0	6	23	10	7	21	80.679						?	?	?	?	?	?	471	71
ASV223	0	0	18	1986	354	1684	0	1	4	80.659						Phragmoplastophyta	?	?	?	?	?	455	70
ASV96	0	0	0	5102	6851	2641	0	0	0	80.597						Phragmoplastophyta	?	?	?	?	?	469	69
ASV1583	84	32	0	0	0	0	17	0	0	80.597						Protalveolata	Perkinsidae	A31	?	?	?	469	74
ASV2709	0	0	5	0	6	5	1	7	22	80.597						Protalveolata	Perkinsidae	A31	?	?	?	469	71
ASV664	13	0	0	0	0	0	147	231	318	80.556						?	?	?	?	?	?	468	71
ASV1359	34	19	76	5	3	37	1	0	2	80.556						Ascomycota	Arthoniomycetes	?	?	?	Phaeococcomycetaceae sp.	468	77
ASV2174	47	26	3	0	0	0	0	0	0	80.556						Protalveolata	Perkinsidae	A31	?	?	?	468	73
ASV2858	7	3	0	0	0	0	4	11	15	80.508						?	?	?	?	?	?	472	68
ASV836	226	205	27	20	0	0	0	1	1	80.472						?	?	?	?	?	?	466	79
[truncated: 282 more rows]
