# Supplementary material
Source: Research Square preprint supplement (doi:10.21203/rs.3.rs-9238693/v1)
Supplement: Supplementary file 2 [file 67a9a6c9adf1dce6d4e80107.xlsx]

## Sheet: GRACE_dipnet results
Kingdom	Phylum	Class	Order	Family	Genus	DC	DS	RL	Taxa	Taxa ID	DC_log	DS_log	RL_log
Metazoa	Annelida	Oligochaeta				0	2	3	Oligochaeta	75641	0	0.477121	0.60206
Metazoa	Arthropoda	Arachnida				20	11	0	Arachnida	6854	1.32222	1.07918	0
Metazoa	Arthropoda	Branchiopoda	Cladocera			14	41	3	Cladocera	6665	1.17609	1.62325	0.60206
Metazoa	Arthropoda	Hexanauplia	Cyclopoida			47	55	1	Cyclopoida	84308	1.68124	1.74819	0.30103
Metazoa	Arthropoda	Hexanauplia	Calanoida			315	250	0	Calanoida	6833	2.49969	2.39967	0
Metazoa	Arthropoda	Malacostraca	Isopoda	Janiridae	Heterias	0	0	613	Heterias	525535	0	0	2.78817
Metazoa	Arthropoda	Malacostraca	Decapoda	Parastacidae	Cherax	14	10	1	Cherax	6722	1.17609	1.04139	0.30103
Metazoa	Arthropoda	Malacostraca	Decapoda	Atyidae	Caridina	0	2	38	Caridina	96236	0	0.477121	1.59106
Metazoa	Arthropoda	Collembola	Entomobryidae			1	0	1	Entomobryidae	48704	0.30103	0	0.30103
Metazoa	Arthropoda	Collembola	Sminthuridae			3	2	2	Sminthuridae	39131	0.60206	0.477121	0.477121
Metazoa	Arthropoda	Insecta	Odonata	Lestidae	Austrolestes minjerriba	73	2	0	Austrolestes minjerriba	1407147	1.86923	0.477121	0
Metazoa	Arthropoda	Insecta	Odonata	Lestidae	Indolestes	0	4	0	Indolestes	411012	0	0.69897	0
Metazoa	Arthropoda	Insecta	Odonata	Aeshnidae	Hemianax papuensis	11	1	0	Anax	39259	1.07918	0.30103	0
Metazoa	Arthropoda	Insecta	Odonata	Lestidae	Zyxomma	0	1	0	Zyxomma	447958	0	0.30103	0
Metazoa	Arthropoda	Insecta	Odonata	Libellulidae	Agrionoptera insignis allogenes?	1	4	4	Agrionoptera insignis	333427	0.30103	0.69897	0.69897
Metazoa	Arthropoda	Insecta	Hemiptera	Veliidae	Microvelia	15	1	1	Microvelia	95679	1.20412	0.30103	0.30103
Metazoa	Arthropoda	Insecta	Hemiptera	Notonectidae	Enithares	17	8	0	Enithares	575840	1.25527	0.954243	0
Metazoa	Arthropoda	Insecta	Hemiptera	Corixidae	Sigara	7	0	0	Sigara	446485	0.90309	0	0
Metazoa	Arthropoda	Insecta	Coleoptera	Dytiscidae	Sternopriscus weiri?_A	8	29	25	Sternopriscus	309224	0.954243	1.47712	1.41497
Metazoa	Arthropoda	Insecta	Coleoptera	Hydraenidae	Hydraena	2	0	0	Hydraena	290659	0.477121	0	0
Metazoa	Arthropoda	Insecta	Coleoptera	Chrysomelidae		0	0	1	Chrysomelidae	27439	0	0	0.30103
Metazoa	Arthropoda	Insecta	Trichoptera	Ecnomidae	Ecnomus	12	3	1	Ecnomus	177959	1.11394	0.60206	0.30103
Metazoa	Arthropoda	Insecta	Trichoptera	Hydroptilidae	Acritoptila_or_Hellyethira	2	22	0	Hydroptilidae	57995	0.477121	1.36173	0
Metazoa	Arthropoda	Insecta	Trichoptera	Leptoceridae	Notoperata	1	1	0	Notoperata	699984	0.30103	0.30103	0
Metazoa	Arthropoda	Insecta	Diptera	Chaoboridae		0	1	0	Chaoboridae	41811	0	0.30103	0
Metazoa	Arthropoda	Insecta	Diptera	Culicidae		5	0	0	Culicidae	7157	0.778151	0	0
Metazoa	Arthropoda	Insecta	Diptera	Chironomidae	Ceratopogoninae	0	13	0	Ceratopogoninae	43801	0	1.14613	0
Metazoa	Arthropoda	Insecta	Diptera	Chironomidae	Paramerina	233	150	40	Paramerina	891943	2.36922	2.17898	1.61278
Metazoa	Arthropoda	Insecta	Diptera	Chironomidae	Tanytarsus	25	27	404	Tanytarsus	288802	1.41497	1.44716	2.60746
Metazoa	Arthropoda	Insecta	Diptera	Chironomidae	Dicrotendipes	147	107	18	Dicrotendipes	302185	2.17026	2.03342	1.27875

## Sheet: Fauna summary
Samples Jan- April 2023		(Note that samples have been collected from all sites, but not all have been sorted yet)
Abundance Dip net 10 second sweeps = 3 pools, 3 sweeps per pool					Swamp	DuckCk	RedLagoon	Dilli Swamp
A:adult, L:larvae		Cassie data			Site	Site 7	Site 2	Site 9
Phylum	Subphyllum	Class	Subclass/Order/Suborde	Familiy	Taxa/ Code	Total	Total	Total
Annelida		Oligochaeta	Oligochaeta		Oligochaeta	0	2	3
				Naididae	Naididae sp 1	0	0	0
					Pristina nr longiseta	0	0	0
Arthropoda	Crustacea	Branchiopoda	Cladocera		Cladocera	14	41	3
		Copepoda	Cyclopoida		Cyclopoida	47	55	1
			Calanoida		Calanoida	315	250	0
		Malacostraca	Isopoda	Janiridae	Heterias sp.1	0	0	613		In samples from clear stream	Asellota, Janiroidea, Janiridae, and the genus is Heterias Richardson, 1904. It is a small freshwater genus, with one species in Chile and three in Australia—two species from Tasmania and one from Victoria.
		Malacostraca	Decapoda	Parastacidae	Cherax robustus	1	1	0
				Parastacidae	Cherax robustus Juvenile	13	9	1
				Atyidae	Caridina indistincta?	0	2	38
Arthropoda	Hexapoda	Collembola	Entomobryomorpha	Entomobryidae	Entomobryidae	1	0	1
			Symphypleona	Sminthuridae	Sminthuridae	3	2	2
Arthropoda	Hexapoda	Insecta	Odonata	Lestidae	Indolestes sp.?	0	4	0
					Austrolestes minjerriba	73	2	0
				Coenagrionidae	Ceriagrion aeruginosum?	0	0	0
					Coenagrionidae sp.1	0	0	0
				Aeshnidae	Hemianax papuensis	3	0	0
					Anax sp1. hemianax papuensis?	8	2	0
				Libellulidae	Agrionoptera insignis allogenes?	1	4	4
					Zyxomma elgneri	0	1	0
					Libellulidae sp.3	0	0	0
Arthropoda	Hexapoda	Insecta	Hemiptera	Corixidae	Sigara sp.	7	0	0
				Notonectidae	Enithares sp.	17	8	0
				Veliidae	Microvelia sp.	15	1	1
				Gerridae	Gerridae sp.	0	0	0
				Saldidae	Saldidae sp.	0	0	0
Arthropoda	Hexapoda	Insecta	Coleoptera	Dytiscidae	Sternopriscus weiri?_A	1	20	9
					Sternopriscus weiri?_L	7	9	14
					Sternopriscus sp.2_A	0	0	0		2023 K’GARI FRASER ISLAND CADDIS SPECIES LIST - identified by David Cartwright
					Antiporus sp._A	0	0	0		ECNOMIDAE
					Antiporus sp._L	0	0	0		Daternomina bifida Cartwright
					Hydrovatus_L	0	0	0		Queensland. 2 males (CT-943), 2 females?, K’gari, Fraser Island, Dilli bridge nr village, 25.5997°S 153.0904°E, 27 Apr 2023, R. St Clair (MVM/QM?)
				Hydraenidae	Hydraena_A	2	0	0		NB. These male specimens differ slightly from the holotype.
				Hydrophilidae	Enochrus_A	0	0	0
				Noteridae	Neohydrocoptus_or _Hydrocanthus_L	0	0	0		Daternomina genoaensis Cartwright
					Hydrocanthus waterhousei Adult
				Scirtidae	Scirtidae sp.1	0	0	0		5 males (CT-942), 5 females?, K’gari, Fraser Island, Boardwalk, 25.5993°S 153.0928°, 27 Apr 2023, R. St Clair (MVM/QM?).
				Scirtidae	Scirtidae sp.2	0	0	0		NB. These male specimens differ slightly from the holotype.
				Chrysomelidae	Chrysomelidae sp.	0	0	1
Arthropoda	Hexapoda	Insecta	Trichoptera	Ecnomidae	Ecnomus sp. * see above	12	3	1		Ecnomina thinotes Neboiss
				Hydroptilidae	Acritoptila_or_Hellyethira	2	22	0		1 male, 5 females?, K’gari, Fraser Island, Dilli bridge nr village, 25.5993°S 153.0928°, 27 Apr 2023, R. StClair (QM?);
					Notoperata sp.AV2	1	1	0		1 male, 4 females?, K’gari, Fraser Island, Boardwalk, 25.5997°S 153.0904°E, 27 Apr 2023, R. St Clair (QM?).
					Oecelis sp.AV13	0	3	0
					Triplectides sp.2 ??	0	0	0		Ros St Clair
					Triplectides ciuskus	0	0	0		Lake Boomanjin - Triplectides ciuskus, they're a bit boring on K'gari. They might eat wood and leaves falling from trees around the edges but further in there are fewer options for them. They would at least eat out the Lepironia stems they live in.
Arthropoda	Hexapoda	Insecta	Diptera	Chironomidae	Tanypodinae - Paramarina sp 1	233	145	39		Only Central Station had what is possibly a new species of Triplectides, all others were T.ciuskus
					Tanytarsini - Tanytarsus sp 1	25	27	404
					Chironomini - Dicrotendipes sp 1	147	107	18
				Ceratopogonidae	Ceratopogoninae sp.1	0	5	1
					Ceratopogoninae sp.2	0	13	0
					Atrichopogon sp.	0	0	0
				Culicidae	Culicinae	5	0	0
					Anophelinae sp.2	0	0	0
				Chaoboridae	Chaoboridae sp.1	0	1	0
Arthropoda	Chelicerata	Arachnida	Acari		Acari_sp.1	3	2	0
					Acari_sp.2	2	0	0
					Acari_sp.3	2	0	0
					Acari_sp.4	3	4	0
					Acari_sp.5	2	0	0
					Acari_sp.6	7	0	0
					Acari_sp.7	1	0	0
					Acari_sp.8	0	0	0
					Acari_sp.9	0	2	0
					Acari_sp.10	0	2	0
					Acari_sp.11	0	0	0
					Acari_sp.12	0	1	0
					Acari_sp.13	0	0	0
					Acari_sp.14	0	0	0
		These specimens may be the same as the ones above			Acari_Cassie_sp.1	0	0	0
					Acari_Cassie_sp.2	0	0	0
					Acari_Cassie_sp.3	0	0	0
					Acari_Cassie_sp.4	0	0	0
					Acari_Cassie_sp.5	0	0	0
					Richness	31	31	17
					Total abundance	973	751	1154		2878
							Tadpoles
Total taxa	72
Total fauna	7282					DuckCk	RedLagoon	Dilli Swamp

## Sheet: Fauna 2023
Fauna					Nannophya australis
Abundance Dip net 10 second sweeps = 3 pools, 3 sweeps per pool					Swamp	DuckCk	DuckCk	DuckCk	DuckCk	DuckCk	DuckCk	DuckCk	DuckCk	DuckCk	Bogimbah	Bogimbah	Bogimbah	Bogimbah	Bogimbah	Bogimbah	Bogimbah	Bogimbah	Bogimbah	RedLagoon	RedLagoon	RedLagoon	RedLagoon	RedLagoon	RedLagoon	RedLagoon	RedLagoon	RedLagoon	MoonPoint	MoonPoint	MoonPoint	MoonPoint	MoonPoint	MoonPoint	MoonPoint	MoonPoint	MoonPoint	Ungowa Rd	Ungowa Rd	Ungowa Rd	Ungowa Rd	Ungowa Rd	Ungowa Rd	Ungowa Rd	Ungowa Rd
A:adult, L:larvae		Cassie data			Site	Site7	Site7	Site7	Site7	Site7	Site7	Site7	Site7	Site7	Site4	Site4	Site4	Site4	Site4	Site4	Site4	Site4	Site4	Site2	Site2	Site2	Site2	Site2	Site2	Site2	Site2	Site2	Site6	Site6	Site6	Site6	Site6	Site6	Site6	Site6	Site6	Site8	Site8	Site8	Site8	Site8	Site8	Site8	Site8
pools with clear water					Pool	P1	P1	P1	P2	P2	P2	P3	P3	P3	P1	P1	P1	P2	P2	P2	P3	P3	P3	P1	P1	P1	P2	P2	P2	P3	P3	P3	P1	P1	P1	P2	P2	P2	P4	P4	P4	P1	P1	P1	P2	P2	P2	P3	P3
					Sample	A	B	C	A	B	C	A	B	C	A	B	C	A	B	C	A	B	C	A	B	C	A	B	C	A	B	C	A	B	C	A	B	C	A	B	C	A	B	C	A	B	C	A	B
Phylum	Subphyllum	Class	Subclass/Order/Suborde	Familiy	Taxa/ Code	S7_P1A	S7_P1B	S7_P1C	S7_P2A	S7_P2B	S7_P2C	S7_P3A	S7_P3B	S7_P3C	S4_P1A	S4_P1B	S4_P1C	S4_P2A	S4_P2B	S4_P2C	S4_P3A	S4_P3B	S4_P3C	S2_P1A	S2_P1B	S2_P1C	S2_P2A	S2_P2B	S2_P2C	S2_P4A	S2_P4B	S2_P4C	S6_P1A	S6_P1B	S6_P1C	S6_P2A	S6_P2B	S6_P2C	S6_P4A	S6_P4B	S6_P4C	S8_P1A	S8_P1B	S8_P1C	S8_P2A	S8_P2B	S8_P2C	S8_P3A	S8_P3B
Annelida		Oligochaeta	Oligochaeta		Oligochaeta	0	0	0	0	0	0	0	0	0	0	0	0	0	0	0	0	0	0	0	0	0	0	1	0	0	1	0	0	0	0	0	0	0	0	0	0	1	0	0	0	0	0	0	1
Annelida		Oligochaeta	Oligochaeta	Naididae	Naididae sp 1
Annelida		Oligochaeta	Oligochaeta	Naididae	Pristina nr longiseta
Arthropoda	Crustacea	Branchiopoda	Cladocera		Cladocera	2	6	2	0	0	2	2	0	0	48	4	11	1	2	9	7	0	0	6	2	6	13	4	1	2	4	3	0	0	0	0	0	0	0	0	0	0	3	7	0	1	2	0	2
Arthropoda	Crustacea	Copepoda	Cyclopoida		Cyclopoida	5	16	0	3	3	18	0	2	0	58	6	9	4	2	18	7	0	4	16	0	13	7	2	5	3	2	7	12	8	3	23	13	31	1	5	4	53	32	21	19	15	19	49	71
Arthropoda	Crustacea	Copepoda	Calanoida		Calanoida	69	134	73	0	3	25	1	5	5	60	9	15	7	9	170	427	0	133	0	1	88	29	1	4	84	20	23	2	1	0	0	2	0	0	0	0	0	0	0	0	0	0	0	0
Arthropoda	Crustacea	Malacostraca	Isopoda	Janiridae	Heterias sp.1	0	0	0	0	0	0	0	0	0	0	0	0	0	0	0	0	0	0	0	0	0	0	0	0	0	0	0	0	0	0	0	0	0	0	0	0	0	0	0	0	5	1	16	15
Arthropoda	Crustacea	Malacostraca	Decapoda	Parastacidae	Cherax robustus	0	0	0	1	0	0	0	0	0	0	0	0	0	0	0	0	0	0	0	0	0	0	0	0	0	0	1	0	0	0	1	0	0	0	0	0	0	0	0	3	0	0	0	0
Arthropoda	Crustacea	Malacostraca	Decapoda	Parastacidae	Cherax robustus Juvenile	0	0	0	11	0	1	0	0	1	0	0	2	0	0	1	0	0	0	3	0	0	1	2	1	1	1	0	2	1	1	1	0	1	0	0	0	0	0	0	0	0	0	0	2
Arthropoda	Crustacea	Malacostraca	Decapoda	Atyidae	Caridina indistincta?	0	0	0	0	0	0	0	0	0	0	0	0	0	0	0	0	0	0	0	1	1	0	0	0	0	0	0	0	0	0	0	0	0	0	0	0	0	0	0	0	0	0	0	0
Arthropoda	Hexapoda	Collembola	Entomobryomorpha	Entomobryidae	Entomobryidae	0	0	0	0	0	0	1	0	0	0	0	0	0	0	0	0	0	0	0	0	0	0	0	0	0	0	0	0	0	0	0	1	0	0	0	0	0	0	0	0	0	0	0	0
Arthropoda	Hexapoda	Collembola	Symphypleona	Sminthuridae	Sminthuridae	0	0	0	0	1	2	0	0	0	0	1	0	2	2	1	1	1	1	2	0	0	0	0	0	0	0	0	0	1	0	0	0	0	1	0	0	0	0	0	0	0	0	0	0
Arthropoda	Hexapoda	Insecta	Odonata	Lestidae	Indolestes sp.?	0	0	0	0	0	0	0	0	0	0	0	0	0	0	0	0	0	0	0	1	0	0	0	0	1	1	1	1	1	0	0	0	0	0	0	0	0	0	0	0	0	0	0	0
Arthropoda	Hexapoda	Insecta	Odonata	Lestidae	Austrolestes minjerriba	12	6	10	11	2	9	1	13	9	0	0	0	0	0	0	1	0	1	0	0	0	0	0	0	0	2	0	0	0	0	0	0	0	0	0	0	3	4	11	0	5	3	1	0
Arthropoda	Hexapoda	Insecta	Odonata	Coenagrionidae	Ceriagrion aeruginosum?	0	0	0	0	0	0	0	0	0	0	0	0	0	0	0	0	0	0	0	0	0	0	0	0	0	0	0	0	0	0	0	0	0	0	0	0	0	0	0	1	0	0	0	0
Arthropoda	Hexapoda	Insecta	Odonata	Coenagrionidae	Coenagrionidae sp.1	0	0	0	0	0	0	0	0	0	0	0	0	0	0	0	0	0	0	0	0	0	0	0	0	0	0	0	0	0	0	0	0	0	0	0	0	0	0	0	0	0	0	0	0
Arthropoda	Hexapoda	Insecta	Odonata	Aeshnidae	Hemianax papuensis	2	0	0	1	0	0	0	0	0	0	0	0	0	0	0	0	0	0	0	0	0	0	0	0	0	0	0	0	0	0	0	0	0	0	0	0	0	0	0	0	0	1	1	1
Arthropoda	Hexapoda	Insecta	Odonata	Aeshnidae	Anax sp1. hemianax papuensis?	1	2	0	0	0	3	1	0	1	1	0	0	0	0	0	0	0	1	0	1	0	0	0	0	1	0	0	0	0	0	0	0	0	0	0	0	1	0	0	0	0	0	0	0
Arthropoda	Hexapoda	Insecta	Odonata	Libellulidae	Agrionoptera insignis allogenes?	0	0	0	0	0	1	0	0	0	0	0	0	4	0	0	0	2	0	0	3	0	0	0	0	1	0	0	0	0	0	0	0	0	0	0	0	0	0	0	0	0	0	0	0
Arthropoda	Hexapoda	Insecta	Odonata	Libellulidae	Zyxomma elgneri	0	0	0	0	0	0	0	0	0	0	0	0	0	0	0	0	0	1	1	0	0	0	0	0	0	0	0	0	0	0	0	0	0	0	0	0	0	0	0	0	0	0	0	0
Arthropoda	Hexapoda	Insecta	Odonata	Libellulidae	Nannophya australis	0	0	0	0	0	0	0	0	0	0	0	0	0	0	0	0	0	0	0	0	0	0	0	0	0	0	0	0	0	0	0	0	0	0	0	0	0	0	0	0	0	0	0	0
Arthropoda	Hexapoda	Insecta	Hemiptera	Corixidae	Sigara sp.	4	1	1	1	0	0	0	0	0	0	0	1	0	0	0	0	2	0	0	0	0	0	0	0	0	0	0	0	0	0	0	0	0	0	1	0	1	0	0	0	0	0	0	2
Arthropoda	Hexapoda	Insecta	Hemiptera	Notonectidae	Enithares sp.	7	3	1	0	1	0	1	1	3	1	0	5	0	0	0	0	0	2	0	0	2	4	1	0	0	1	0	1	0	1	0	0	0	1	0	0	1	0	3	0	0	1	0	1
Arthropoda	Hexapoda	Insecta	Hemiptera	Veliidae	Microvelia sp.	6	0	0	1	0	2	5	0	1	7	0	3	2	1	5	3	5	9	0	1	0	0	0	0	0	0	0	0	1	0	0	0	0	0	0	1	0	1	1	0	0	1	1	0
Arthropoda	Hexapoda	Insecta	Hemiptera	Gerridae	Gerridae sp.	0	0	0	0	0	0	0	0	0	0	0	5	3	1	2	0	0	1	0	0	0	0	0	0	0	0	0	0	0	0	0	0	0	0	0	0	0	0	0	0	0	0	0	0
Arthropoda	Hexapoda	Insecta	Hemiptera	Saldidae	Saldidae sp.	0	0	0	0	0	0	0	0	0	0	0	0	0	0	0	0	0	0	0	0	0	0	0	0	0	0	0	0	0	0	0	0	0	0	0	0	1	0	0	0	0	0	0	0
Arthropoda	Hexapoda	Insecta	Coleoptera	Dytiscidae	Sternopriscus weiri?_A	0	0	0	1	0	0	0	0	0	11	1	4	2	3	0	3	1	6	11	3	1	0	1	0	3	0	1	0	0	0	1	0	0	0	0	0	0	0	0	1	1	0	0	0
Arthropoda	Hexapoda	Insecta	Coleoptera	Dytiscidae	Sternopriscus weiri?_L	1	0	0	1	0	4	0	1	0	10	1	9	9	8	11	8	19	22	4	4	0	0	0	0	1	0	0	1	0	0	1	3	1	0	0	0	1	0	3	1	3	1	1	0
Arthropoda	Hexapoda	Insecta	Coleoptera	Dytiscidae	Sternopriscus sp.2_A	0	0	0	0	0	0	0	0	0	0	0	0	0	0	0	0	0	0	0	0	0	0	0	0	0	0	0	0	0	0	0	0	0	0	0	0	0	0	0	0	0	0	0	0
Arthropoda	Hexapoda	Insecta	Coleoptera	Dytiscidae	Antiporus sp._A	0	0	0	0	0	0	0	0	0	0	0	0	0	0	0	0	0	0	0	0	0	0	0	0	0	0	0	0	0	0	0	0	0	0	0	0	1	0	0	0	0	0	0	0
Arthropoda	Hexapoda	Insecta	Coleoptera	Dytiscidae	Antiporus sp._L	0	0	0	0	0	0	0	0	0	0	0	0	0	0	0	0	0	0	0	0	0	0	0	0	0	0	0	0	0	0	0	0	0	0	0	0	0	0	0	0	0	0	0	0
Arthropoda	Hexapoda	Insecta	Coleoptera	Dytiscidae	Hydrovatus_L	0	0	0	0	0	0	0	0	0	0	0	0	0	0	0	0	0	0	0	0	0	0	0	0	0	0	0	0	0	0	0	0	0	0	0	0	0	0	0	0	0	0	0	2
Arthropoda	Hexapoda	Insecta	Coleoptera	Hydraenidae	Hydraena_A	0	1	0	0	0	0	1	0	0	0	0	0	0	0	0	0	0	0	0	0	0	0	0	0	0	0	0	0	0	0	0	0	0	0	0	0	0	0	0	0	0	0	0	0
Arthropoda	Hexapoda	Insecta	Coleoptera	Hydrophilidae	Enochrus_A	0	0	0	0	0	0	0	0	0	1	0	0	0	0	0	0	0	0	0	0	0	0	0	0	0	0	0	0	0	0	0	0	0	0	0	0	1	1	1	0	1	0	2	1
Arthropoda	Hexapoda	Insecta	Coleoptera	Noteridae	Neohydrocoptus_or _Hydrocanthus_L	0	0	0	0	0	0	0	0	0	0	0	0	0	0	0	0	0	0	0	0	0	0	0	0	0	0	0	0	0	0	0	0	0	0	0	0	0	0	0	0	0	0	0	0
Arthropoda	Hexapoda	Insecta	Coleoptera	Scirtidae	Scirtidae sp.1	0	0	0	0	0	0	0	0	0	0	0	0	0	0	0	0	0	0	0	0	0	0	0	0	0	0	0	0	0	0	0	0	0	2	2	3	0	0	0	0	0	0	0	0
Arthropoda	Hexapoda	Insecta	Coleoptera	Scirtidae	Scirtidae sp.2	0	0	0	0	0	0	0	0	0	0	0	0	0	0	0	0	0	0	0	0	0	0	0	0	0	0	0	0	0	0	0	0	0	1	1	0	0	0	0	0	0	0	0	0
Arthropoda	Hexapoda	Insecta	Coleoptera	Chrysomelidae	Chrisomelidae sp.	0	0	0	0	0	0	0	0	0	0	0	0	0	0	0	0	0	0	0	0	0	0	0	0	0	0	0	0	0	0	0	0	0	0	0	0	0	0	0	0	0	0	0	0
Arthropoda	Hexapoda	Insecta	Trichoptera	Ecnomidae	Ecnomus sp.	0	0	0	5	1	0	1	4	1	0	0	0	0	0	0	0	0	0	0	0	2	0	0	0	0	0	1	0	0	0	0	0	0	0	0	0	0	0	0	0	0	0	0	0
Arthropoda	Hexapoda	Insecta	Trichoptera	Hydroptilidae	Acritoptila_or_Hellyethira	0	0	0	0	0	2	0	0	0	2	0	0	3	3	11	0	1	0	10	3	3	0	1	0	0	3	2	1	0	1	0	0	0	0	0	0	0	0	0	0	0	0	0	0
Arthropoda	Hexapoda	Insecta	Trichoptera	Leptoceridae	Notoperata sp.AV2	0	0	0	0	0	0	1	0	0	0	0	0	0	0	0	0	0	0	0	0	0	0	0	0	0	1	0	0	0	0	0	0	0	0	0	0	0	0	0	0	0	0	0	0
Arthropoda	Hexapoda	Insecta	Trichoptera	Leptoceridae	Oecelis sp.AV13	0	0	0	0	0	0	0	0	0	0	0	0	2	1	13	13	5	7	1	1	1	0	0	0	0	0	0	0	0	0	1	0	0	1	0	0	0	0	0	0	0	0	0	0
Arthropoda	Hexapoda	Insecta	Trichoptera	Leptoceridae	Triplectides sp.2 ?? Checked by Ros?	0	0	0	0	0	0	0	0	0	0	0	0	0	0	0	0	0	0	0	0	0	0	0	0	0	0	0	0	0	0	0	0	0	0	0	0	0	0	0	1	0	0	0	0
Arthropoda	Hexapoda	Insecta	Trichoptera	Leptoceridae	Triplectides ciuskus	0	0	0	0	0	0	0	0	0	0	0	0	0	0	0	0	0	0	0	0	0	0	0	0	0	0	0	0	0	0	0	0	0	0	0	0	0	0	0	0	0	0	0	0
Arthropoda	Hexapoda	Insecta	Diptera	Chironomidae	Tanypodinae - Paramarina sp 1	47	29	30	15	62	23	8	5	14	85	12	29	21	4	21	13	42	27	10	22	34	18	8	5	26	6	16	13	7	7	17	39	27	0	1	0	0	4	3	2	1	2	0	0
Arthropoda	Hexapoda	Insecta	Diptera	Chironomidae	Tanytarsini - Tanytarsus sp 1	6	5	4	7	1	0	1	1	0	96	25	73	42	17	29	67	10	51	1	3	1	4	9	5	2	1	1	3	10	2	40	32	23	0	0	0	0	0	0	0	2	0	0	0
Arthropoda	Hexapoda	Insecta	Diptera	Chironomidae	Chironomini - Dicrotendipes sp 1	10	28	24	13	27	11	9	16	9	22	10	18	12	9	22	10	0	10	4	6	8	25	24	22	3	11	4	1	3	1	0	4	1	0	0	0	3	14	7	9	55	10	11	27
Arthropoda	Hexapoda	Insecta	Diptera	Ceratopogonidae	Ceratopogoninae sp.1	0	0	0	0	0	0	0	0	0	0	0	0	0	0	0	0	0	0	0	3	1	1	0	0	0	0	0	0	0	0	0	0	0	2	0	0	0	0	0	0	0	0	0	0
Arthropoda	Hexapoda	Insecta	Diptera	Ceratopogonidae	Ceratopogoninae sp.2	0	0	0	0	0	0	0	0	0	1	0	0	2	0	1	0	0	1	8	0	0	0	1	0	0	4	0	0	0	1	1	0	0	1	2	3	0	0	0	0	0	0	0	0
Arthropoda	Hexapoda	Insecta	Diptera	Ceratopogonidae	Atrichopogon sp.	0	0	0	0	0	0	0	0	0	0	0	0	0	0	0	0	0	0	0	0	0	0	0	0	0	0	0	0	0	0	0	0	0	1	0	0	0	0	0	0	0	0	0	0
Arthropoda	Hexapoda	Insecta	Diptera	Culicidae	Culicinae	0	1	0	1	0	0	1	0	2	4	4	1	0	0	0	0	0	0	0	0	0	0	0	0	0	0	0	0	0	0	0	0	0	0	0	0	0	0	0	0	0	0	0	1
Arthropoda	Hexapoda	Insecta	Diptera	Culicidae	Anophelinae sp.2	0	0	0	0	0	0	0	0	0	0	0	0	0	0	0	0	0	0	0	0	0	0	0	0	0	0	0	0	0	0	0	0	0	0	0	0	1	1	2	0	1	0	0	1
Arthropoda	Hexapoda	Insecta	Diptera	Chaoboridae	Chaoboridae sp.1	0	0	0	0	0	0	0	0	0	0	0	0	0	0	0	0	0	0	0	0	0	0	0	0	0	0	1	0	0	0	0	0	0	0	0	0	0	0	1	0	0	0	0	0
Arthropoda	Chelicerata	Arachnida	Acari		Acari_sp.1	1	1	0	0	1	0	0	0	0	0	0	0	0	0	0	0	0	1	0	0	0	0	0	0	2	0	0	0	0	0	0	0	0	0	0	0	0	0	0	0	0	0	0	0
Arthropoda	Chelicerata	Arachnida	Acari		Acari_sp.2	1	0	0	0	0	1	0	0	0	0	0	0	0	0	0	0	0	0	0	0	0	0	0	0	0	0	0	0	0	0	0	0	0	0	0	0	0	0	0	0	0	0	0	0
Arthropoda	Chelicerata	Arachnida	Acari		Acari_sp.3	0	0	0	1	0	1	0	0	0	0	0	0	0	0	0	0	0	0	0	0	0	0	0	0	0	0	0	0	0	1	0	1	0	0	0	0	0	0	0	0	0	0	0	0
Arthropoda	Chelicerata	Arachnida	Acari		Acari_sp.4	0	1	0	1	0	1	0	0	0	0	0	0	0	0	0	0	0	0	0	2	0	0	0	0	1	1	0	0	0	0	0	0	0	0	0	0	0	0	0	0	0	0	2	1
Arthropoda	Chelicerata	Arachnida	Acari		Acari_sp.5	0	1	0	0	0	0	1	0	0	0	0	0	0	0	0	0	0	0	0	0	0	0	0	0	0	0	0	0	0	0	0	0	0	0	0	0	0	0	0	0	0	0	0	0
Arthropoda	Chelicerata	Arachnida	Acari		Acari_sp.6	0	1	3	0	2	0	1	0	0	3	0	0	0	0	1	0	0	0	0	0	0	0	0	0	0	0	0	0	0	0	0	0	0	0	0	0	0	0	0	0	0	0	0	0
Arthropoda	Chelicerata	Arachnida	Acari		Acari_sp.7	0	0	1	0	0	0	0	0	0	0	0	0	0	0	0	0	0	0	0	0	0	0	0	0	0	0	0	0	0	0	0	0	0	0	0	0	0	0	0	0	0	0	0	0
Arthropoda	Chelicerata	Arachnida	Acari		Acari_sp.8	0	0	0	0	0	0	0	0	0	10	5	4	0	0	3	1	0	2	0	0	0	0	0	0	0	0	0	0	0	0	0	0	0	0	0	0	0	0	0	0	0	0	0	0
Arthropoda	Chelicerata	Arachnida	Acari		Acari_sp.9	0	0	0	0	0	0	0	0	0	2	0	0	0	0	0	0	0	0	1	0	0	0	1	0	0	0	0	0	0	1	0	1	0	0	0	0	1	0	0	0	0	0	0	0
Arthropoda	Chelicerata	Arachnida	Acari		Acari_sp.10	0	0	0	0	0	0	0	0	0	0	0	0	0	1	1	0	0	0	0	0	1	0	0	0	1	0	0	0	0	0	0	0	0	0	0	0	0	0	0	0	0	0	0	0
Arthropoda	Chelicerata	Arachnida	Acari		Acari_sp.11	0	0	0	0	0	0	0	0	0	0	0	0	0	0	0	0	0	11	0	0	0	0	0	0	0	0	0	0	0	0	0	0	0	0	0	0	0	0	0	0	0	0	0	0
Arthropoda	Chelicerata	Arachnida	Acari		Acari_sp.12	0	0	0	0	0	0	0	0	0	0	0	0	0	0	0	0	0	0	0	1	0	0	0	0	0	0	0	0	1	0	0	0	0	0	0	0	0	0	0	0	0	0	0	0
Arthropoda	Chelicerata	Arachnida	Acari		Acari_sp.13	0	0	0	0	0	0	0	0	0	0	0	0	0	0	0	0	0	0	0	0	0	0	0	0	0	0	0	0	0	0	1	0	0	0	0	0	0	0	0	0	0	0	0	0
Arthropoda	Chelicerata	Arachnida	Acari		Acari_sp.14	0	0	0	0	0	0	0	0	0	0	0	0	0	0	0	0	0	0	0	0	0	0	0	0	0	0	0	0	0	0	0	0	1	0	0	0	0	0	0	0	0	0	0	0
Arthropoda	Chelicerata	Arachnida	Acari		Acari_Cassie_sp.1
Arthropoda	Chelicerata	Arachnida	Acari		Acari_Cassie_sp.2
Arthropoda	Chelicerata	Arachnida	Acari		Acari_Cassie_sp.3
Arthropoda	Chelicerata	Arachnida	Acari		Acari_Cassie_sp.4
Arthropoda	Chelicerata	Arachnida	Acari		Acari_Cassie_sp.5
					Richness	15	16	10	16	11	16	16	9	10	18	11	15	15	14	17	13	10	19	14	17	14	9	13	7	15	15	12	10	10	10	10	9	7	9	6	4	13	8	11	8	11	10	9	14
					Comments	2 Aranae	1 Aranae		1 Aranae		1 Aranae	2 Aranae			1 Aranae	1 Aranae				1 Aranae		frog		Tadpole, Eel	Taadpole		Tadpole, 1 Aranae	Tadpole	Tadpole							Tadpole	Tadpole	Tadpole, 1 Aranae	5 Aranae	2 Aranae	Tadpole			Tadpole				1 Aranae
[truncated: 20 more columns]

## Sheet:  Fauna Nov 2022
							Sandy Peat Site 1	Next to Site 1 (sandy peat too)
	Abundance D-Net	Check identification. A:adult, L:larvae		Swamp	RedLagoon	Dilli 1	Burnt Peat 1	Burnt Peat2 By Bridge	DuckCk	MoonPoint	Freshwater Swamp
				Burnt/Unb	UN	BU	BU	BU	UN	BU	UN
				Date	nov-22	nov-22	nov-22	nov-22	jan-23	jan-23	jan-24
				Site	Site 2	Site9	Site1	---	Site 7	Site 6	Site 3
				PersonalCode	1	2	3	4	5	6	7
	Annelida	Oligochaeta		Oligochaeta					1
1	Crustacea	Cladocera		Sididae	6		2	2	2
2				Daphniidae			1	2	16		9
3				Chidoridae	1
4		Copepoda		Ciclopoidea	54		3	7	3	3
5				Calanoidea	2		1		34
6		Isopoda	Asellota	Asellotasp	2	53	1	1
7		Decapoda	Parastacidae	Cherax robustus
8			Parastacidae	Cherax robustus_JUVENILE?					1
9			Atyidae	Caridina celebensis		2
10			Atyidae	Atyidaesp							8
11			Palaemonidae	Palaemonidae sp			1
12	Collembola	Collembola		Entomobryidae
13				Sminthuridae			1	4			4
14	Insecta	Odonata	Coenagrionidae	Ceriagrion aeruginosum						1	1
15			Lestidae	Austrolestes minjerriba					7
16				Austrolestes analis/aridus					6
17			Aeshnidae	Hemianax papuensis
18			Aeshnidae	Anax papuensis/gibelosus					4
19			Libellulidae	Agrionoptera insignis allogenes					1
20	Insecta	Hemiptera	Corixidae	Sigara	3				1
21			Notonectidae	Enithares	4				6		1
22			Veliidae	Microvelia	1		1	3	4
23			Nepidae	Ranatra			1
24			Hydrometridae	Hydrometra				2
25	Insecta	Coleoptera	Dytiscidae	Sternopriscus weiri_A	1				2
26				Sternopriscus weiri_L	23			1	4
27				Antiporus_A	3				1	1
28				Antiporus_L	4					1
29			Hydraenidae	Hydraena_A			1
30			Hydrophilidae	Enochrus_A						1
31			Scirtidae_L	Scirtidaesp_L	2		1
32	Insecta	Trichoptera	Ecnomidae	Ecnomia			4		1
33			Leptoceridae	Lepto			1	2
34	Insecta	Diptera	Chironomidae	Tanypodinae - Paramarina sp 1	8	3	6		2	2	2
35				Tanytarsini - Tanytarsus sp 1					1
36				Chironomini - Dicrotendipes sp 1	24		1		1
37	Insecta	Diptera	Ceratopogonidae	Ceratopogonidae	2				1	1
38			Culicidae	Culicinae	2				2
39	Arachnida	Acari		Acari	1	1	8	5	7		1

## Sheet: Sheet1
Taxa	DC	DS	RL
Oligochaeta	0	0.477121	0.60206
Arachnida	1.32222	1.07918	0
Cladocera	1.17609	1.62325	0.60206
Cyclopoida	1.68124	1.74819	0.30103
Calanoida	2.49969	2.39967	0
Heterias	0	0	2.78817
Cherax	1.17609	1.04139	0.30103
Caridina	0	0.477121	1.59106
Entomobryidae	0.30103	0	0.30103
Sminthuridae	0.60206	0.477121	0.477121
Austrolestes minjerriba	1.86923	0.477121	0
Indolestes	0	0.69897	0
Anax	1.07918	0.30103	0
Zyxomma	0	0.30103	0
Agrionoptera insignis	0.30103	0.69897	0.69897
Microvelia	1.20412	0.30103	0.30103
Enithares	1.25527	0.954243	0
Sigara	0.90309	0	0
Sternopriscus	0.954243	1.47712	1.41497
Hydraena	0.477121	0	0
Chrysomelidae	0	0	0.30103
Ecnomus	1.11394	0.60206	0.30103
Hydroptilidae	0.477121	1.36173	0
Notoperata	0.30103	0.30103	0
Chaoboridae	0	0.30103	0
Culicidae	0.778151	0	0
Ceratopogoninae	0	1.14613	0
Paramerina	2.36922	2.17898	1.61278
Tanytarsus	1.41497	1.44716	2.60746
Dicrotendipes	2.17026	2.03342	1.27875

## Sheet: Sheet2
Taxa	Taxa ID	1DC	1DS	1RL	2DC	2DS	2RL
Bivalvulida	35583	0	0	0	0.747679	1.50218	1.85249
Pseudomugil	160494	0	0	0	2.98741	3.36018	2.83362
Nannoperca	135769	0	0	0	0.969495	0	0
Hypseleotris	86238	0	0	0	0.23299	0.948779	0
Mogurnda	78194	0	0	0	1.23972	0.733799	2.63768
Adinetida	104779	0	0	0	1.62364	4.98035	2.30538
Ploimida	84394	0	0	0	4.41965	4.7625	4.51874
Flosculariacea	2517309	0	0	0	1.35924	2.89182	3.34917
Oligochatea (Haplotaxida)	6382	0	0.477121	0.60206	2.74181	3.08666	0.663742
Chaetonotida	41320	0	0	0	4.06377	4.87329	4.84588
Rhabdocoela	27901	0	0	0	2.52952	0	4.28123
Catenulida	39236	0	0	0	2.00454	3.47504	2.42742
Rhabditida	6236	0	0	0	2.05594	4.73709	0.90081
Enoplida	57287	0	0	0	1.2038	3.55546	0.537595
Araeolaimida	114861	0	0	0	1.17843	0.789739	1.99484
Tylenchida	33283	0	0	0	0	0	0.886639
Monhysterida	70219	0	0	0	1.6912	0.46007	1.04953
Chromadorida	70242	0	0	0	0	1.42656	0.100343
Limnozetes	229839	0	0	0	2.2977	0.471658	1.04663
Araneae	6893	1.32222	1.07918	0	0.74177	0.740036	0
Podonidae (cladocera)	141398	1.17609	1.62325	0.60206	0.46007	1.41472	0.477121
Bosmina	27402	1.17609	1.62325	0.60206	2.13043	0.15904	3.44709
Scapholeberis	77652	1.17609	1.62325	0.60206	1.76681	0.732886	0.551071
Macrotrichidae	77757	1.17609	1.62325	0.60206	2.20148	0.551071	3.51948
Alonopsis (cladocerea)	423247	1.17609	1.62325	0.60206	0	1.1401	0
Heterias	525535	0	0	2.78817	2.04688	1.53003	4.04176
Caridina	96236	0	0.477121	1.59106	0	0	0
Cherax	6722	1.17609	1.04139	0.30103	0.615033	0	1.30894
Cyclopicina (cyclopodia)	2030957	1.68124	1.74819	0.30103	4.52954	0.497121	3.87389
Mesocyclops	245081	1.68124	1.74819	0.30103	4.32727	3.67464	3.7278
Ectocyclops	281260	1.68124	1.74819	0.30103	2.17095	3.89166	1.00925
Macrocyclops (cyclopodia)	281257	1.68124	1.74819	0.30103	4.12124	3.86081	3.83052
Tortanus (calanoidua)	163478	2.49969	2.39967	0	4.37753	0.39203	3.72755
Pontellina	239962	2.49969	2.39967	0	1.70817	1.4792	0.800467
Eudiaptomus	251516	2.49969	2.39967	0	4.50665	0.401373	3.94911
Skistodiaptomus	236536	2.49969	2.39967	0	4.53394	0.482386	3.9889
Hemidiaptomus (calanoida)	935982	2.49969	2.39967	0	4.09139	0.418424	3.60532
Sminthuridae (collembola)	39131	0.60206	0.477121	0.477121	1.4515	0.660757	0
Entomobryidae (collembola)	48704	0.30103	0	0.30103	1.4515	0.660757	0
Ischnura	79456	0	0	0	3.31928	0	0
Indolestes	411012	0	0.69897	0	3.28484	2.4601	0
Austrolestes minjerriba	1407147	1.86923	0.477121	0	0	0	0
Anax	39259	1.07918	0.30103	0	1.07144	1.65955	1.37678
Allorrhizucha	333428	0	0	0	2.08366	1.54897	1.70611
Agrionoptera insignis	333427	0.30103	0.69897	0.69897	0	0	0
Zyxomma	447958	0	0.30103	0	0	0	0
Gerridae	36161	0	0	0	0	1.12854	0.200687
Microvelia	95679	1.20412	0.30103	0.30103	0	0	0
Enithares	575840	1.25527	0.954243	0	0	0	0
Sigara	446485	0.90309	0	0	0	2.03044	0
Ecnomus	177959	1.11394	0.60206	0.30103	0	0	0
Notoperata	699984	0.30103	0.30103	0	0	0	0
Hydroptilidae	57995	0.477121	1.36173	0	0	0.8537	0
Sternopriscus	309224	0.954243	1.47712	1.41497	0	0	0
Prionocyphon	538624	0	0	0	0.83505	0	0
Chrysomelidae (chrysomeloidia)	27439	0	0	0.30103	3.72282	3.43354	3.10967
Hydrophilidae	41102	0	0	0	1.90947	0	2.51287
Hydraena	290659	0.477121	0	0	0	0	0
Culicidae	7157	0.778151	0	0	0	0	0
Chaoboridae	41811	0	0.30103	0	0	0	0
Ceratopogoninae	43801	0	1.14613	0	0	0	0
Dicrotendipes	302185	2.17026	2.03342	1.27875	0	0	0
Tanytarsus	288802	1.41497	1.44716	2.60746	2.04938	1.40892	0
Paramerina	891943	2.36922	2.17898	1.61278	0	0	0
Psectrotanypus	903467	0	0	0	0.74177	0.942456	0
Apsectrotanypus	891879	0	0	0	1.09474	1.16019	0
